# Supplementary material
Source: PubMed Central journal article supplement (PMC5985211)
Supplement: NIHMS943414-supplement-supplement_1.pdf [file NIHMS943414-supplement-supplement_1.pdf]

## Supplemental Materials and Methods

**Whole exome sequencing.** Genomic DNA was extracted from whole blood from 567 early onset (age 0-18) IBD samples; 543 (95.8%) of these samples passed DNA QC. Libraries were prepared according to manufacturer instructions using 1 µg of input DNA per sample; whole exome capture was performed with the SureSelect Human All Exon 50-Mb Kit (Agilent Technologies). Libraries were validated with the KAPA Library Quantification Kit (KAPA Biosystems) and were then sequenced on the Illumina HiSeq platform according to standard protocols. Library preparation and sequencing was performed at Broad Institute's Genomics Platform, Cambridge, USA.

**Filtering and validation of variants.** Primers used for validation were designed using EmPrime or Primer3. M13 forward and reverse tags (Forward tag: TGTAACGACGGCCAGT; Reverse tag: CAGGAAACAGCTATGACC) were added to the primer sequence for easier Sanger downstream analysis. The PCR amplicons were purified using Promega, Wizard SV gel and PCR Clean-up System (Promega, Madison, WI) and sent to Genewiz, (South Plainfield, NJ) for sequencing. The Sanger sequencing results were analyzed using the online 4Peaks DNA sequence trace viewer software. The primers used for the validation are shown in Supplemental Table 2. Not all variants required Sanger validation since they were validated by either frequency, by cluster, or by 1000 genomes.

**Circulating Neutrophil Purification and RNA Preparation.** Neutrophils were purified using the MACxpress Neutrophil Isolation Kit according to the manufacturer's protocol (Miltenyi Biotec). After purification the neutrophils were centrifuged and re-suspended in RNAlater (Qiagen) and stored at -80°C until further processing. Neutrophil RNA was extracted using TRIzol LS reagent (Life Technologies) according to the manufacturer's protocol.

**RNA Sequencing and Analysis.** Following removal of barcodes and primers, raw sequences were aligned to the Hg19 human genome, with reference annotations provided by UCSC.

Alignment was performed under the following parameters: 1) minimum identity of 90%; 2) maximum gaps of 5%; 3) minimum aligned read length of 25; 4) one match to output per read; and 5) reads with >5 matches were ignored. Reads were aligned using a proprietary Burrow Wheeler Transform-based method, COBWeb. Using the Expectation-Maximization algorithm, reads per transcript per million (RPKM) were computed from aligned reads. RPKM were thresholded at 1, normalized using the DESeq algorithm, and baselined to the median of all samples (N=40448 transcripts). Transcripts with reasonable expression, >3 reads in 100% of samples in at least one of the three conditions (control, normal ROS Crohns, low ROS Crohns) were included in differential analyses (N=13355 transcripts).

**Ontological Analysis.** In ontological analyses of genes derived from comparing low and normal ROS CD neutrophils to controls, up/down genes included those shared between the low/normal ROS CD vs controls comparisons and those that were specific to low or normal ROS CD (see Venn diagram). In order to provide more granular focus on the transcriptomic impact of low or normal ROS production on glycolysis in the CD background, we performed candidate gene identification and prioritization through Toppgene. Using 'glycolysis' as the query term, we used GATACA ([gataca.cchmc.org](http://gataca.cchmc.org)) and ToppGene to build a glycolysis-related gene set. Using 90 glycolysis genes as the training set, we identified low/normal ROS-related genes with significant functional overlap ( $p < 0.05$ ) with glycolytic functions, processes, and pathways.

Supplemental Table 1. Characteristics of 543 IBD Participants with Exome Sequencing Data.

|                             |                    |           |
|-----------------------------|--------------------|-----------|
| <b>Age at diagnosis</b>     | Range              | 0-18      |
|                             | Median             | 8         |
|                             | Mean               | 7.5       |
| <b>Gender</b>               | Female             | 226 (42%) |
|                             | Male               | 317 (58%) |
| <b>Diagnosis</b>            | CD                 | 416 (77%) |
|                             | UC                 | 89 (16%)  |
|                             | IBD-other          | 38 (7%)   |
| <b>Self-identified race</b> | African-American   | 86 (16%)  |
|                             | Caucasian          | 376 (69%) |
|                             | South/East Asian   | 15 (3%)   |
|                             | Other/Not recorded | 66 (12%)  |

Supplemental Table 2. Primers used for Sanger Sequencing of NADPH Oxidase Gene Variants.

Supplemental Table 3. Clinical and Demographic Characteristics of the Participants with Neutrophil Function Testing

|                          | <b>Age at Diagnosis</b> | <b>Age at Testing</b> | <b>Male</b> | <b>White</b> | <b>AA</b> | <b>L1</b> | <b>L2</b> | <b>L3</b> |
|--------------------------|-------------------------|-----------------------|-------------|--------------|-----------|-----------|-----------|-----------|
| <b>Control</b><br>(n=26) | NA                      | 14(6-19)              | 13(50)      | 21(81)       | 4(15)     | NA        | NA        | NA        |
| <b>CD</b><br>(n=129)     | 11(1-20)                | 15(4-23)              | 79(61)      | 115(89)      | 11(9)     | 13(10)    | 18(14)    | 98(76)    |

AA: African-American; L1: ileal location; L2: colon-only location, L3: ileo-colonic location; CD: Crohn Disease; NA: not applicable; one control & three CD subjects were Asian; age is shown as mean(range) in years; remaining variables are shown as n(%)

Supplemental Table 4. Missense Mutations in Core NADPH Oxidase Genes in European, African, and East/South Asian Ancestry.

The minor allele frequency for validated missense mutations in core NADPH oxidase genes identified in 543 early onset IBD patients is shown for the dbSNP and ExAC databases for the indicated ancestries. Novel mutations for a database are indicated by “-“ for the MAF.

Supplemental Table 5. Neutrophil Activation Markers and Functions in Patients Stratified by FMLP Induced ROS Production

|                     | <b>CD<br/>ROS Lo</b> | <b>CD<br/>ROS HI</b> |
|---------------------|----------------------|----------------------|
| <b>FPR1</b>         | 27(24,31)            | 28(25,32)            |
| <b>CD64 Index</b>   | 1.5(1.1,2)           | 1.2(1,1.4)           |
| <b>CD11B</b>        | 1(0.9,1.1)*          | 1.2(1.1,1.3)         |
| <b>Phagocytosis</b> | 6.6(6.1,7.1)         | 7.3(6.6,8)           |
| <b>Killing</b>      | 85(82,88)            | 85(83,88)            |

ROS Lo was defined as FMLP induced MFI < 360; data are shown as mean (95thCI) MFI for FPR1, CD64 Index, and CD11B; as number of *Staph Aureus* engulfed per cell for phagocytosis; and as percentage of *Staph Aureus* engulfed per cell for killing; \*p<0.05 vs CD ROS HI

Supplemental Table 6. Disease Activity and Treatment Exposures at the Time of Neutrophil Function Measurements

|                                   | <b>Disease Duration</b> | <b>Moderate-Severe Activity</b> | <b>Antibiotic</b> | <b>Cortico-steroid</b> | <b>5ASA</b> | <b>IMM</b> | <b>Anti-TNF</b> |
|-----------------------------------|-------------------------|---------------------------------|-------------------|------------------------|-------------|------------|-----------------|
| <b>CD</b><br>Low ROS<br>(n=61)    | 60(0-156)               | 4(7)                            | 3(5)              | 5(8)                   | 10(16)      | 19(31)     | 37(61)          |
| <b>CD</b><br>Normal ROS<br>(n=68) | 55(0-138)               | 6(9)                            | 8(12)             | 7(10)                  | 11(16)      | 27(40)     | 41(60)          |

Low ROS was defined as FMLP induced MFI < 360; data are shown as mean (range) in months for disease duration or n(%) for other factors; The mean (95thCI) time between neutrophil function measurements and time of surgery was 27(14,40) months. Disease activity was defined by Physician Global Assessment (PGA); 5ASA: mesalamine; IMM: immune modulator, 6-mercaptopurine or methotrexate. Differences between groups were tested by chi2 test.



Supplemental Table 7. Clinical and Demographic Characteristics of  
CD Patients Stratified by Core *NADPH* Oxidase Gene Mutation Carriage

Supplemental Table 8. Core Neutrophil NADPH Oxidase Gene Expression in Normal and Low ROS CD Neutrophils.

| <b>Gene Symbol</b> | <b>Gene ID</b> | <b>CD ROS NI (raw)</b> | <b>CD ROS Lo (raw)</b> | <b>Fold-Change</b> | <b>p-value</b> | <b>Regulation</b> |
|--------------------|----------------|------------------------|------------------------|--------------------|----------------|-------------------|
| <b><i>CYBA</i></b> | 1535           | 459.6597               | 443.3696               | 1.002125           | 0.984565       | up                |
| <b><i>CYBB</i></b> | 1536           | 2075.979               | 2225.3076              | 1.113678           | 0.641644       | up                |
| <b><i>FPR1</i></b> | 2357           | 4200.4673              | 4128.7485              | 1.021205           | 0.912778       | up                |
| <b><i>NCF1</i></b> | 653361         | 943.92926              | 898.38                 | -1.01132           | 0.954754       | down              |
| <b><i>NCF2</i></b> | 4688           | 8668.249               | 9555.354               | 1.14527            | 0.496052       | up                |
| <b><i>NCF4</i></b> | 4689           | 1044.3026              | 1149.8049              | 1.143907           | 0.418135       | up                |
| <b><i>RAC1</i></b> | 5879           | 1451.679               | 1787.6343              | 1.279384           | 0.048853       | up                |
| <b><i>RAC2</i></b> | 5880           | 5833.94                | 5662.6714              | 1.008444           | 0.936435       | up                |

ROS Lo was defined as FMLP induced MFI < 360

Supplemental Table 9. Differentially Expressed Genes in Normal and Low ROS CD Neutrophils and Control Neutrophils.

Differentially expressed genes for each pair-wise comparison are indicated in bold font, with genes also contained within the glycolysis gene training set underlined.

Supplemental Table 10. Glycolysis Trained Gene Sets for Differentially Expressed Genes in Normal and Low ROS CD Neutrophils and Control Neutrophils.

Supplemental Table 11. Biologic Pathways Enriched in Differentially Expressed Genes in Normal and Low ROS CD Neutrophils and Control Neutrophils.

Supplemental Table 12. Core Genes Distinguishing Low ROS CD Neutrophils.

Fold-change differences for each pairwise comparison are shown.

Supplemental Table 13. Potentially Damaging Mutations in Core Genes which Distinguish Low ROS CD Neutrophils.

The minor allele frequency for potentially damaging missense mutations in 50 genes whose expression distinguishes low ROS CD neutrophils identified in 543 early onset IBD patients is shown for the dbSNP and ExAC databases for the indicated ancestries. Novel mutations for a database are indicated by “-“ for the MAF.

Supplemental Figure 1. Neutrophil ROS Production in CD and CGD patients and Healthy Controls.

Neutrophil ROS production was determined in the CCHMC Clinical Immunology Lab and is shown as the median (IQR) for healthy controls (n=11), CD patients (n=17), autosomal recessive (AR) CGD patients (n=5) and X-linked CGD patients (n=6). Differences between groups were tested by ANOVA with Tukey's multiple comparison test. a:p=0.005 versus control; b:p<0.0001 versus AR-CGD and X-linked CGD; c:p<0.0001 versus control and CD.

Supplemental Figure 2. Flow Cytometry Measurement of Neutrophil Cell Surface Proteins.

Representative data are shown for flow cytometry measurement of A) FPR1, B) CD11b, and C) the neutrophil CD64 index.

Supplemental Figure 3. Analytic Pipeline for Gene Expression Data.

Two analytic pipelines were followed to identify transcriptomic and functional signatures of low ROS CD neutrophils in comparison to normal ROS CD neutrophils and control neutrophils. Beginning with all highly expressed transcripts (N=13355), Welch's t-tests were used to identify differentially expressed genes ( $p < 0.05$  and  $fc > 1.5$ ). The first pipeline compared normal ROS CD neutrophils vs controls, and low ROS CD neutrophils vs controls. The second pipeline compared low ROS CD neutrophils vs normal ROS CD neutrophils. These gene lists were submitted for ontological analysis; further, genes from these lists were ranked by functional importance using a glycolysis training set. Top ranked genes were submitted for further ontological analysis.

Supplemental Figure 4. Venn diagram Showing Shared and Unique Genes Differentially Expressed in CD Neutrophils with Low and Normal ROS Production.

In the first analytic pipeline, differentially regulated genes between normal ROS CD neutrophils vs control neutrophils (N=618) and low ROS CD neutrophils vs control neutrophils (N=834) were overlapped using a Venn diagram. We identified 272 consistently downregulated and 105 consistently upregulated genes in low and normal ROS CD compared to controls. Further, we identified 186 down and 271 upregulated genes specific to low ROS CD neutrophils, and 195 down and 46 upregulated genes specific to normal ROS CD neutrophils.

Supplemental Figure 5. Metabolic and Immune Functions Differentially Expressed in CD Neutrophils with Normal and Low ROS Production Compared to Control Neutrophils.

A) Upregulated genes between normal ROS CD neutrophils vs control neutrophils (N=151) and between low ROS CD neutrophils and control neutrophils (N=376) were submitted to ToppCluster for ontological analysis. Highly significant and informative ontologies were selected to identify common mechanisms disrupted in CD neutrophils, and to identify disrupted mechanisms specific to low- and normal-ROS CD neutrophils. B) The same process was repeated for the 467 and 458 genes downregulated in normal and low ROS CD neutrophils, respectively, when compared to control neutrophils.

Supplemental Figure 6. Heat Map of Genes Differentially Expressed between CD Neutrophils with Normal or Low ROS Production and Control Neutrophils.

Candidate gene prioritization through functional enrichment analysis, using genes differentially regulated between normal (A) or low (B) ROS CD neutrophils and controls as the test set and a glycolysis gene list as the training set, ranked the test genes in order of importance in the context of glycolytic functions. Test genes with significant enrichment are included in the heatmap, where blue, black, and yellow correspond to expression below, at, and above the median, respectively.

Supplemental Figure 7. Metabolic and Immune Functions Differentially Expressed between CD Neutrophils with Low versus Normal ROS Production.

In the second analytic pipeline, low ROS CD neutrophils were compared directly to normal ROS to identify 411 differentially regulated genes. Up and downregulated genes were submitted to Topcluster to identify mechanisms and pathways enriched in the gene sets, where highly significant and informative ontologies were included for visualization.

Supplemental Figure 1

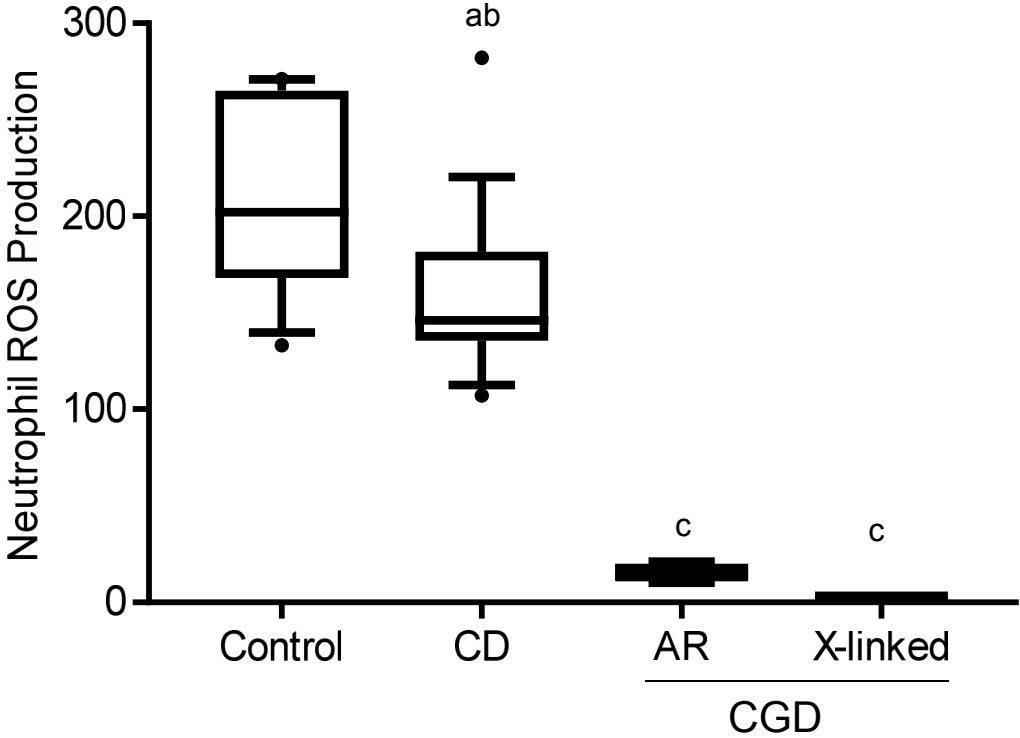

# Supplemental Figure 2

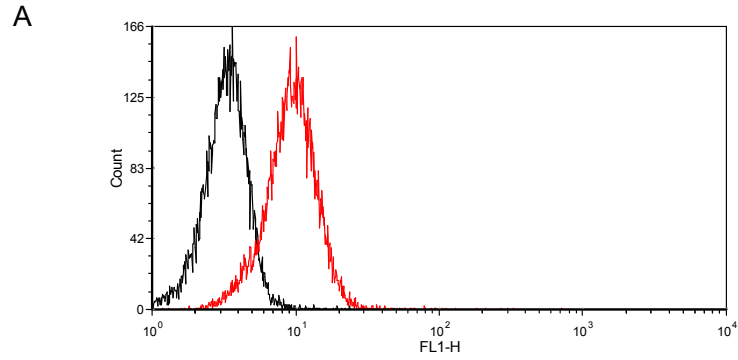

Black isotype, red FPR1

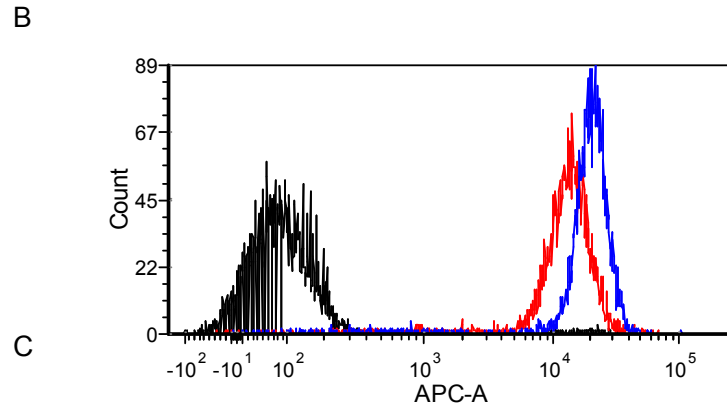

Black isotype,  
Red low ROS CD CD11b  
Blue high ROS CD CD11b

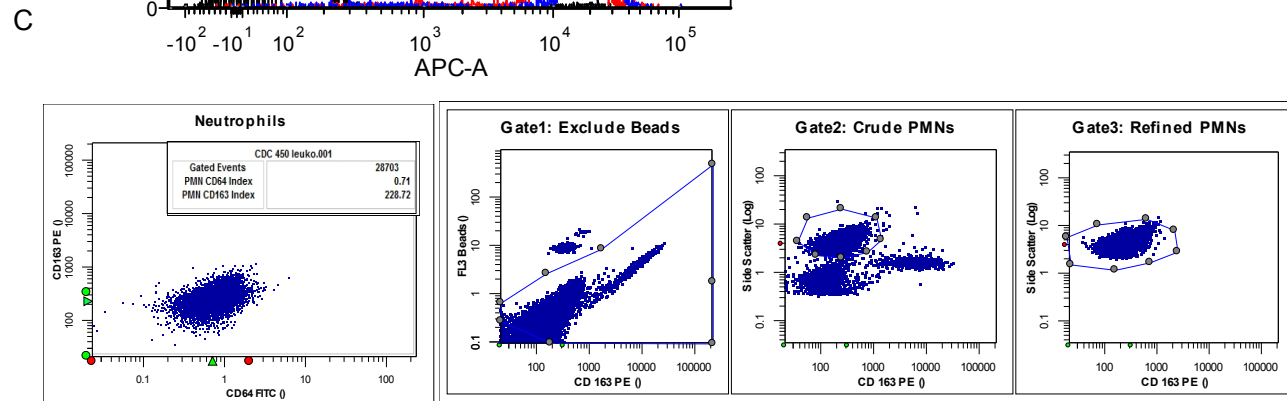

CD64 Index



# Supplemental Figure 3

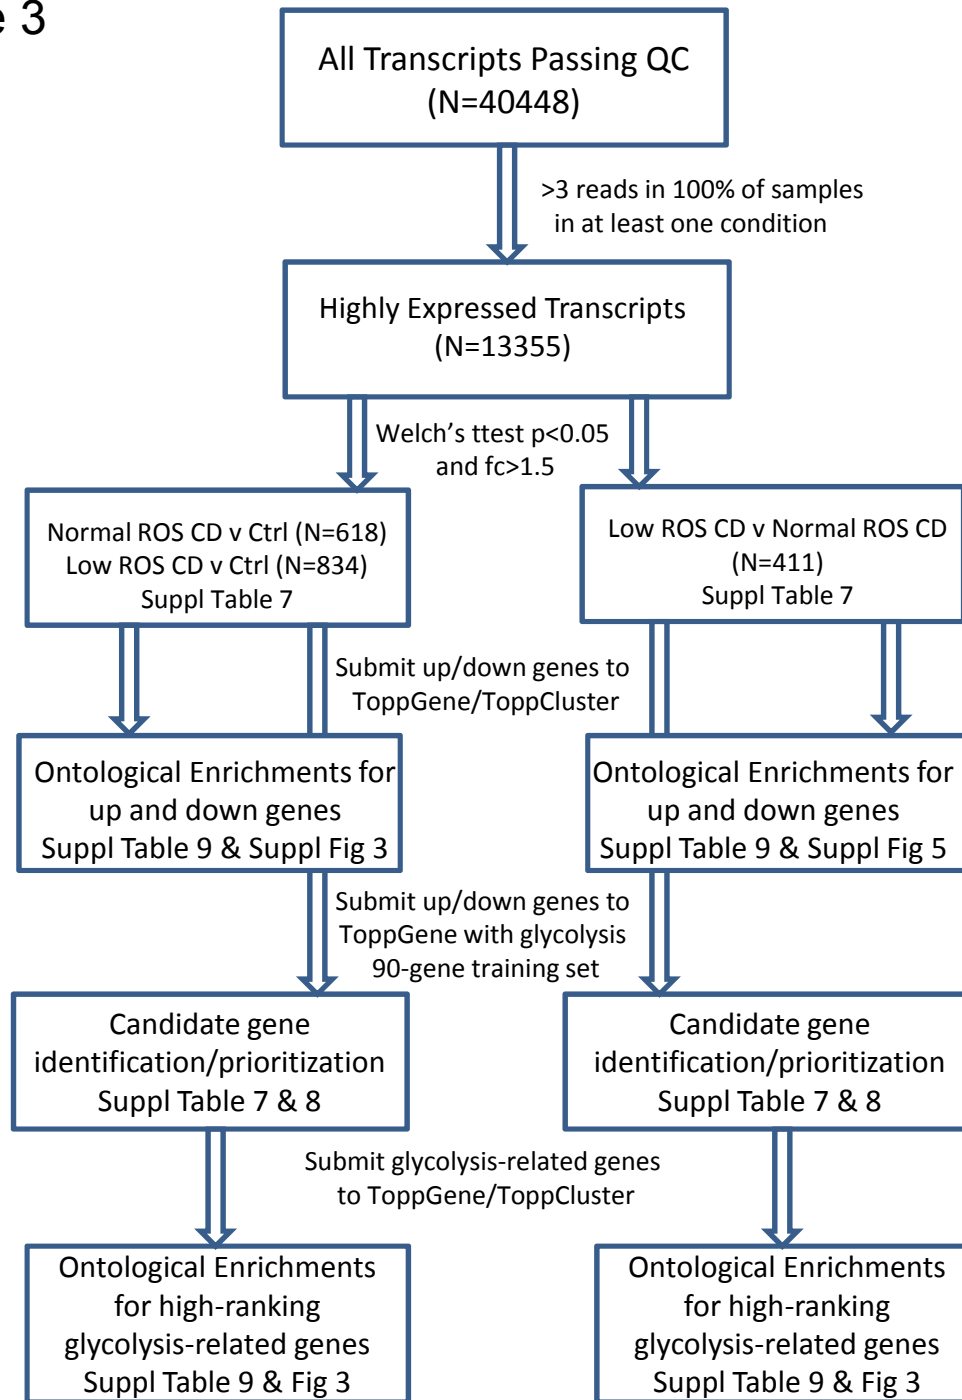

Supplemental Figure 4

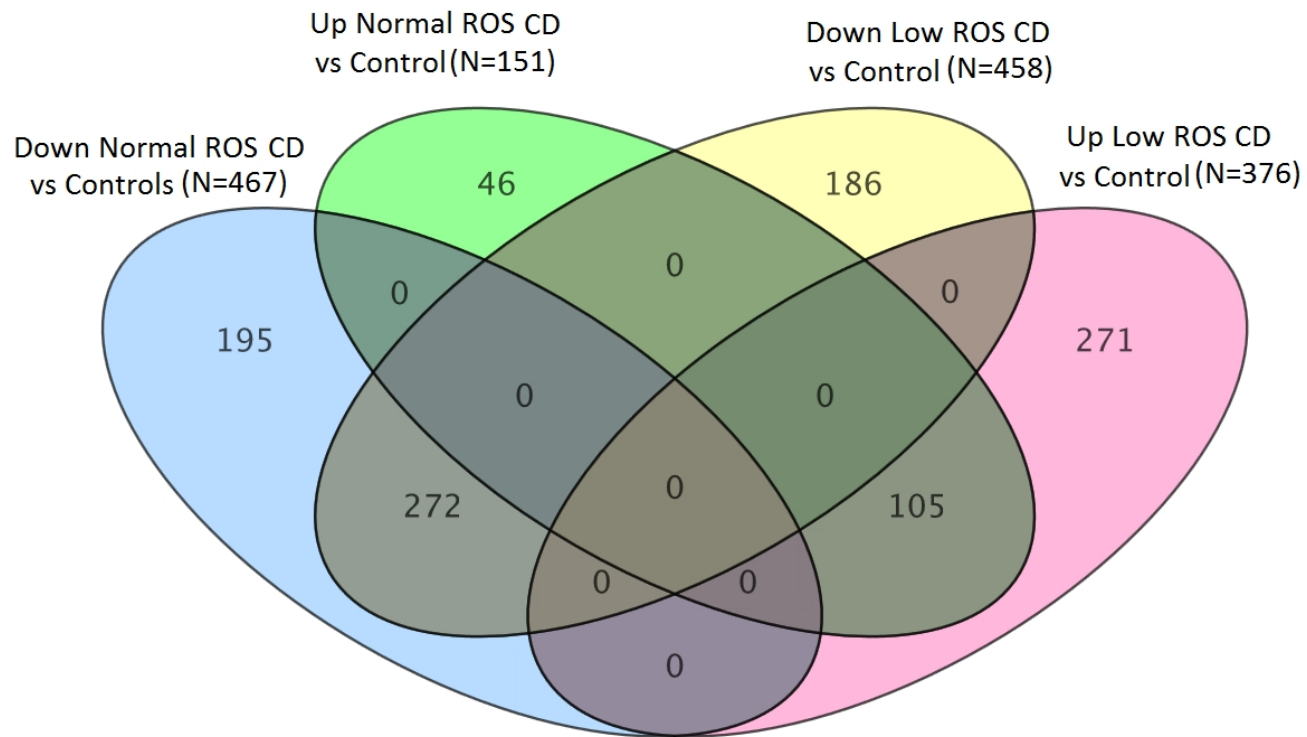

# Supplemental Figure 5A

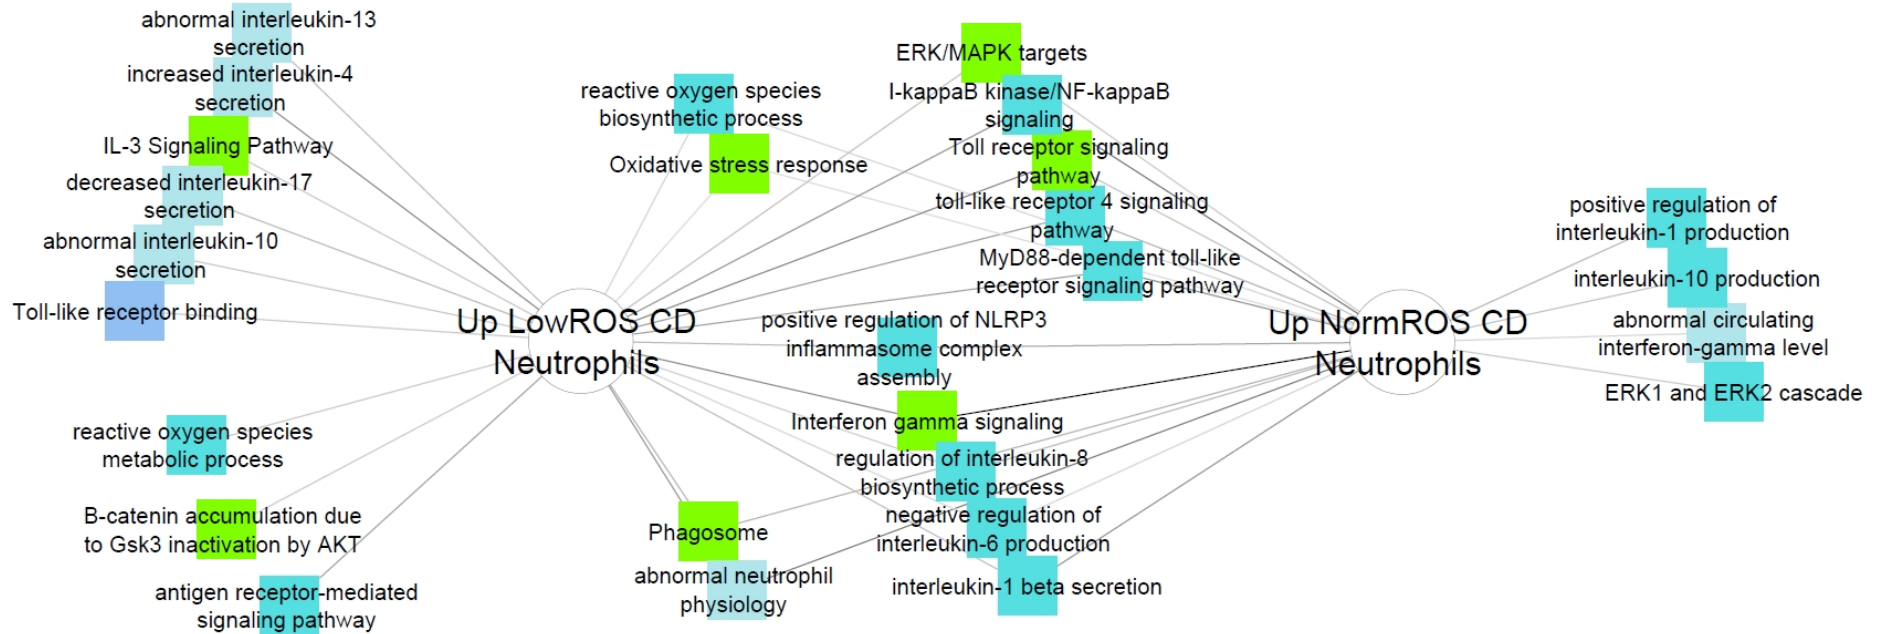

# Supplemental Figure 5B

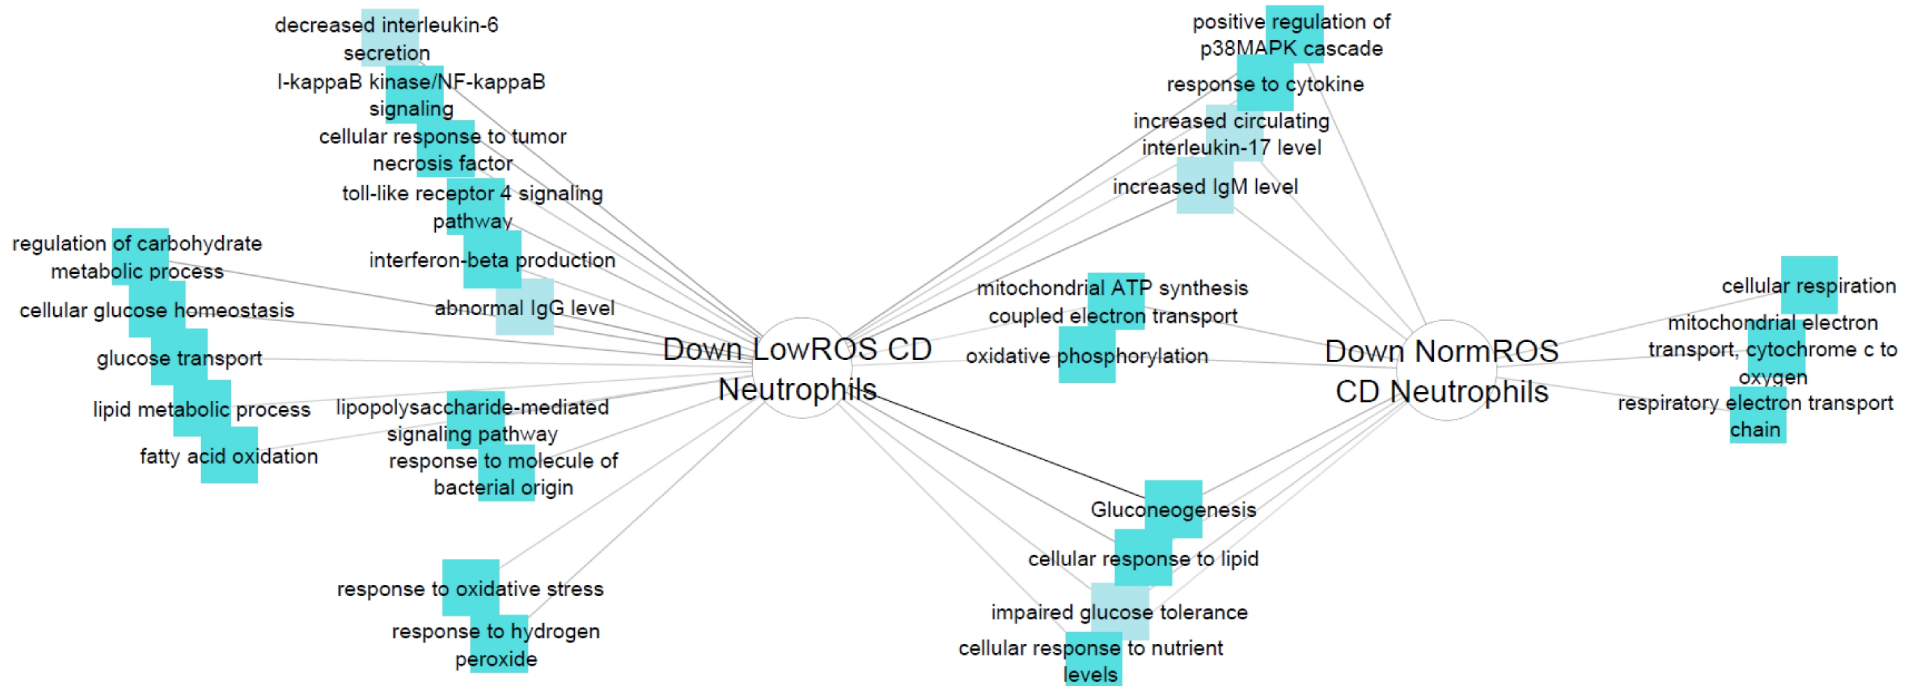

# Supplemental Figure 6A

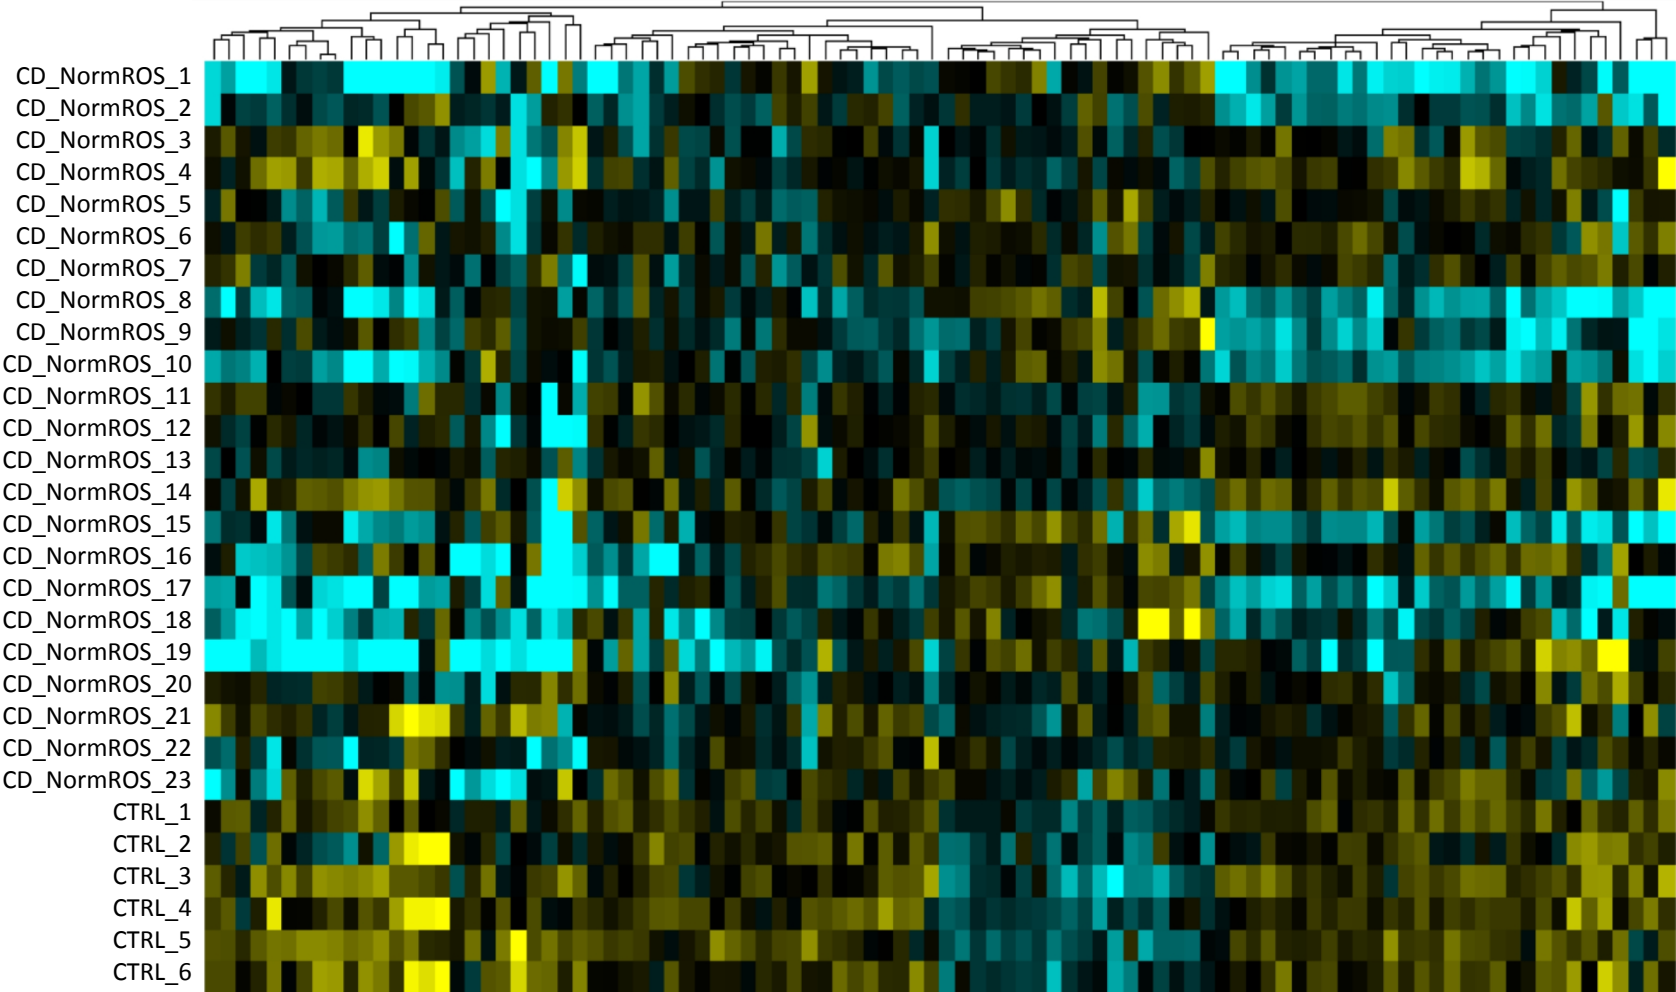

CDKN1A (p=0.015, FC=-2.93)  
 ESRRA3 (p=0.006, FC=-2.88)  
 SIRT6 (p=0.045, FC=-2.66)  
 BMP2 (p=0.033, FC=2.05)  
 CRYL1 (p=0.002, FC=3.42)  
 MYD (p=0.001, FC=3.17)  
 EMT1 (p=0.015, FC=2.63)  
 BMP6 (p=0.04, FC=1.74)  
 ACAT2 (p=0.006, FC=2.16)  
 HMGCS1 (p=0.015, FC=-1.59)  
 NFKBIA (p=0.002, FC=2.16)  
 NUP155 (p=0.027, FC=-1.72)  
 NRIP1 (p=0.001, FC=-1.88)  
 ODC1 (p=0.035, FC=-1.81)  
 POLE3 (p=0.011, FC=-1.86)  
 HAOL1 (p=0.01, FC=-1.8)  
 DOCRH (p=0.001, FC=-2.96)  
 POLR3C (p=0.001, FC=-1.94)  
 RPLA (p=0.018, FC=-2.16)  
 CRT2 (p=0.002, FC=-2.11)  
 MEZD (p=0.003, FC=1.61)  
 KIF18B (p=0.003, FC=1.91)  
 NRP3 (p=0.003, FC=1.82)  
 GUSB (p=0.003, FC=2.09)  
 COX4I1 (p=0.001, FC=2.12)  
 NDUFA7 (p=0.006, FC=1.6)  
 SETD1A (p=0.009, FC=-1.98)  
 ABCF1 (p=0.028, FC=-1.69)  
 PRPS11 (p=0.047, FC=1.72)  
 NT5CC3A (p=0.035, FC=1.73)  
 TRR4 (p=0.04, FC=1.53)  
 MAP2K6 (p=0.046, FC=2.01)  
 CACNA1A (p=0.005, FC=2.46)  
 TUBA1C (p=0.023, FC=2.03)  
 SH2B2 (p=0.044, FC=2.4)  
 NOS3 (p=0.001, FC=1.65)  
 SLC34A2 (p=0.013, FC=2.1)  
 PLAGL2 (p=0.003, FC=2.24)  
 TNFRSF1A (p=0.003, FC=1.57)  
 HIFSE (p=0.012, FC=1.68)  
 CD29 (p=0.032, FC=1.63)  
 SLC22A4 (p=0.003, FC=1.64)  
 MEF2K (p=0.001, FC=1.54)  
 TUBA7 (p=0.001, FC=2.07)  
 BSGNT4 (p=0.019, FC=2.27)  
 CXCR4 (p=0.028, FC=1.84)  
 MED30 (p=0.013, FC=1.81)  
 PLK2 (p=0.023, FC=-1.54)  
 NDUFA5 (p=0.034, FC=-1.54)  
 CHKA (p=0.031, FC=-1.65)  
 BCAT2 (p=0.045, FC=-1.53)  
 GADD45A (p=0.011, FC=-1.59)  
 DUT (p=0.003, FC=-2.32)  
 SUL1A4 (p=0.041, FC=-1.59)  
 PIP5K1B (p=0.006, FC=-1.53)  
 ALOX12 (p=0.016, FC=-1.57)  
 SLC15G1 (p=0.007, FC=-1.54)  
 COX5B (p=0.005, FC=-1.18)  
 ACAD8 (p=0.035, FC=-1.15)  
 A2M1 (p=0.028, FC=-1.51)  
 KONO1 (p=0.019, FC=-1.72)  
 NUPF3 (p=0.004, FC=-2.08)  
 SIRT7 (p=0.003, FC=1.82)  
 BDN (p=0.003, FC=1.82)  
 BMP1B (p=0.01, FC=1.54)  
 CMPK1B (p=0.001, FC=1.64)  
 JAG1 (p=0.008, FC=1.77)  
 PRKAR1B (p=0.011, FC=2.5)  
 CARM1 (p=0.016, FC=-2.48)  
 PIOD3 (p=0.004, FC=-3.2)  
 CDK3 (p=0.005, FC=2.41)  
 PDE6H (p=0.012, FC=-4.37)  
 GALT (p=0.041, FC=-2.21)  
 NT5C (p=0.026, FC=-1.95)  
 COX7A2L (p=0.015, FC=-2.11)  
 AKT1S1 (p=0.044, FC=-1.73)  
 SLC19A2 (p=0.031, FC=-3.62)  
 PER1 (p=0.017, FC=-3.73)  
 TLE1 (p=0.001, FC=6.25)  
 COL1A1 (p=0.002, FC=3.34)  
 PABPC4 (p=0.001, FC=2.69)  
 SLC5A6 (p=0.001, FC=4)  
 NR4A1 (p=0.034, FC=-2.12)  
 COMMD3-BM1 (p=0.027, FC=-2.68)  
 BMT1 (p=0.023, FC=-2.67)  
 NFOR (p=0.032, FC=2)  
 NDUFS8 (p=0.008, FC=2.55)  
 AFG3L (p=0.018, FC=2.31)  
 TESK1 (p=0.045, FC=1.67)  
 GPY1 (p=0.004, FC=-2.59)  
 PLCD1 (p=0.001, FC=-2.92)



# Supplemental Figure 7

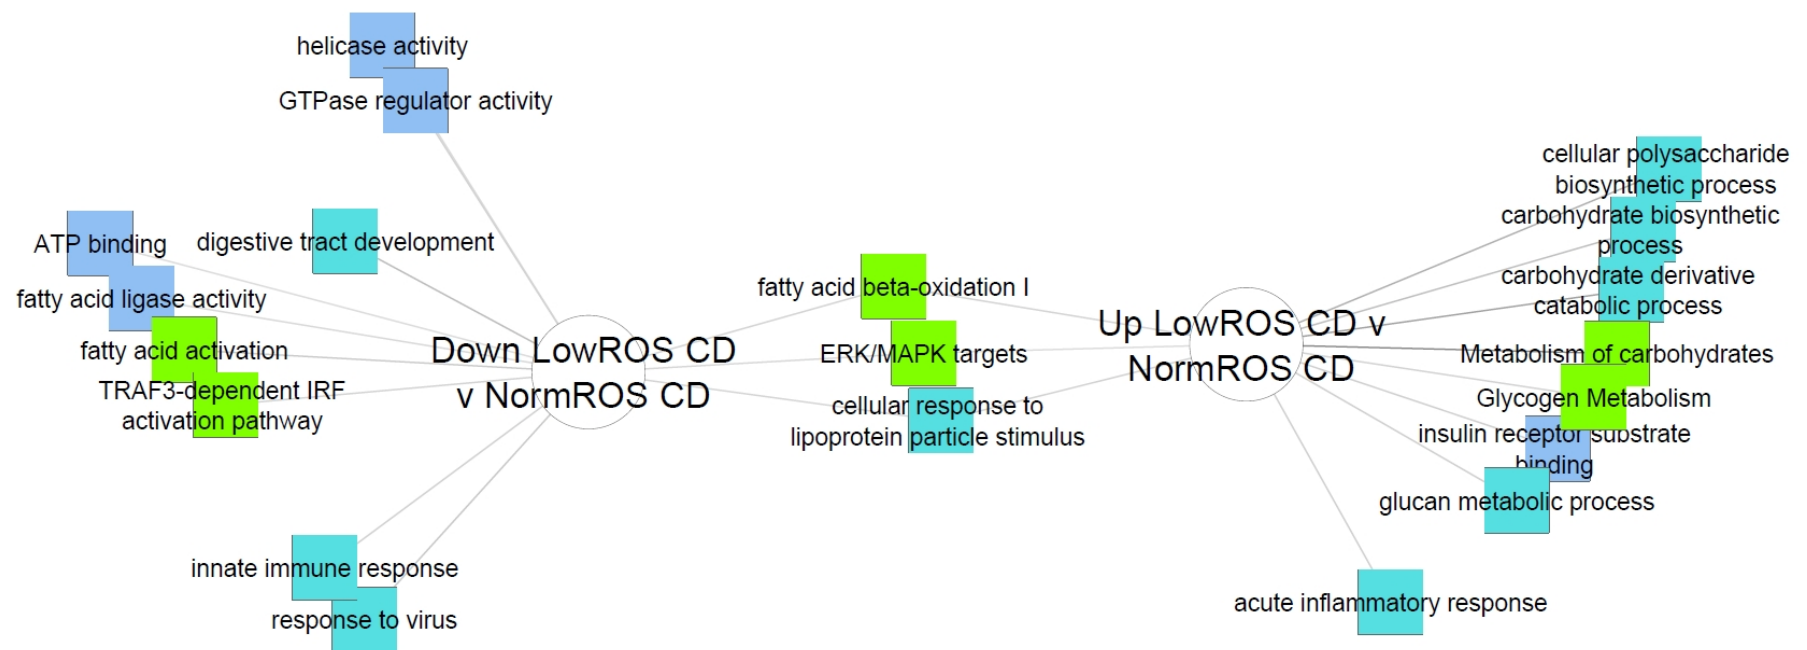

| Gene | chrom | pos       | ref alt | rsID        | Sequencing Forward Primer (5'-3')          | Sequencing Reverse Primer (5'-3')         |
|------|-------|-----------|---------|-------------|--------------------------------------------|-------------------------------------------|
| CYBA | chr16 | 88643450  | C T     | Novel       | TGAAAAACGACGGCCAGTTCGCTGCATTTATTGCAGGTG    | CAGGAAACAGCTATGACCAGTGTCCACCACGGGATCTTC   |
| CYBA | chr16 | 88646184  | C T     | rs779140893 | TGAAAAACGACGGCCAGTGCAGTCATAAACCAACGCAGGT   | CAGGAAACAGCTATGACCAGAACACCCAGGACCGAAACA   |
| CYBA | chr16 | 88646828  | A G     | rs4673      | TGAAAAACGACGGCCAGTGAAAAACACTGAGGTAAGTGGGGG | CAGGAAACAGCTATGACCAGTGCCAGACCTGTTGGAACC   |
| CYBA | chr16 | 88647125  | T G     | rs11547387  | TGAAAAACGACGGCCAGTGAAAAACACTGAGGTAAGTGGGGG | CAGGAAACAGCTATGACCAGTGCCAGACCTGTTGGAACC   |
| NCF1 | chr7  | 74777318  | C T     | rs782800778 | TGAAAAACGACGGCCAGTAATCCAGGACAACCGCAAAGA    | CAGGAAACAGCTATGACCAAACACCTAAAAGGCCGAGC    |
| NCF1 | chr7  | 74779274  | G A     | rs139225348 | TGAAAAACGACGGCCAGTTCGGGCTTGACCTCATGTT      | CAGGAAACAGCTATGACCTGAAGAAGTCGAGGAGGTGGG   |
| NCF1 | chr7  | 74779295  | C T     | Novel       | TGAAAAACGACGGCCAGTTCGGGCTTGACCTCATGTTCT    | CAGGAAACAGCTATGACCTGAAGAAGTCGAGGAGGTGGG   |
| NCF1 | chr7  | 74779319  | T G     | rs144018361 | TGAAAAACGACGGCCAGTTCGGGCTTGACCTCATGTT      | CAGGAAACAGCTATGACCTGAAGAAGTCGAGGAGGTGGG   |
| NCF1 | chr7  | 74779322  | A G     | rs10614     | TGAAAAACGACGGCCAGTTCGGGCTTGACCTCATGTTCT    | CAGGAAACAGCTATGACCTGAAGAAGTCGAGGAGGTGGG   |
| NCF1 | chr7  | 74780830  | C A     | Novel       | TGAAAAACGACGGCCAGTTCCTCCTCAGGACAAAAAAGCC   | CAGGAAACAGCTATGACCTTCATTGAGCCGAAACACTC    |
| NCF2 | chr1  | 183560204 | G A     | rs55761650  | TGAAAAACGACGGCCAGTACAGGAAAGTCTGAGTGCTCAAC  | CAGGAAACAGCTATGACCTTCAGGGTGACCAAGGCTTTC   |
| NCF2 | chr1  | 183563531 | T A     | rs147744729 | TGAAAAACGACGGCCAGTCTCATTGCACTACCACTGTGT    | CAGGAAACAGCTATGACCTGTGCCAAATCACGAAACTGC   |
| NCF2 | chr1  | 183566954 | A G     | rs35937854  | TGAAAAACGACGGCCAGTCTCCAAGTTAGCACATCTGGGC   | CAGGAAACAGCTATGACCTCATGTTCAACGGGCAGGTAT   |
| NCF2 | chr1  | 183590217 | C T     | rs147415774 | TGAAAAACGACGGCCAGTGACTAGGACAGCCTTCACAAAGG  | CAGGAAACAGCTATGACCAGGGTTATGAGTCAGTTGCCAAA |
| NCF4 | chr22 | 36865055  | C A     | rs112306225 | TGAAAAACGACGGCCAGTTCCTCCTTAGGTTTTCTGCATCG  | CAGGAAACAGCTATGACCTAGAGTGCTTGGGGTGAAGC    |



| Gene | chrom | pos       | ref alt | rsID                            | AA change | Alt allele effect | cadd | dbSNP MAF | hg19 pos (for Exac) | ExAC freq   | ExAC European MAF | ExAC African MAF | ExAC East/South Asian MAF |
|------|-------|-----------|---------|---------------------------------|-----------|-------------------|------|-----------|---------------------|-------------|-------------------|------------------|---------------------------|
| CYBA | chr16 | 88643450  | C T     | Novel                           | R164H     | nonsynonymous     | 35   | -         | 88709858            | -           | -                 | -                | -                         |
| CYBA | chr16 | 88646184  | C T     | rs779140893                     | A101T     | nonsynonymous     | 24.9 | 0.000009  | 88712592            | -           | -                 | -                | -                         |
| CYBA | chr16 | 88646816  | C T     | rs149344911                     | V76M      | nonsynonymous     | 24   | 0.000795  | 88713224            | 0.00075381  | 1.37412E-05       | 0.006755453      | 0.000557014               |
| CYBA | chr16 | 88646828  | A G     | rs4673                          | Y72H      | nonsynonymous     | 11.7 | 0.689776  | 88713236            | 0.690830215 | 0.684183071       | 0.54867684       | 0.729532978               |
| CYBA | chr16 | 88647125  | T G     | rs11547387                      | K60T      | nonsynonymous     | 3.32 | 0.003791  | 88713533            | 0.003870922 | 0.00516692        | 0.001614292      | 0.000460675               |
| CYBB | chrX  | 37798966  | G A     | rs139670417                     | R229H     | nonsynonymous     | 26.7 | 0.000788  | 37658219            | 0.000667671 | 0.000180837       | 0.004772902      | 0                         |
| CYBB | chrX  | 37804069  | G C     | rs141756032                     | G364R     | nonsynonymous     | 23   | 0.003901  | 37663322            | 0.004000732 | 0.006105822       | 0.000587475      | 0.001194815               |
| NCF1 | chr7  | 74777318  | C T     | rs782800778                     | R42W      | nonsynonymous     | 31   | 0.000062  | 74191664            | 6.16034E-05 | 7.17731E-05       | 0.000108085      | 4.33163E-05               |
| NCF1 | chr7  | 74779274  | G A     | rs139225348                     | G83R      | nonsynonymous     | 20.2 | 0.008833  | 74193620            | 0.009059    | 0.01331           | 0.002852         | 0.0016795                 |
| NCF1 | chr7  | 74779295  | C T     | Novel                           | R90C      | nonsynonymous     | 31   | -         | 74193641            | -           | -                 | -                | -                         |
| NCF1 | chr7  | 74779319  | T G     | rs144018361                     | C98G      | nonsynonymous     | 22.9 | 0.000712  | 74193665            | 0.0007298   | 0.001215          | 0.0002341        | 0                         |
| NCF1 | chr7  | 74779322  | A G     | rs17856077, rs17295741, rs10614 | S99G      | nonsynonymous     | -    | -         | 74193668            | 0.4984      | 0.47845           | 0.3351           | 0.5174                    |
| NCF1 | chr7  | 74780830  | C A     | Novel                           | A149E     | nonsynonymous     | -    | -         | 74195176            | -           | -                 | -                | -                         |
| NCF1 | chr7  | 74783529  | G A     | rs145360423                     | W193*     | stopGain          | 36   | 0.000646  | 74197872            | 0.0006464   | 0.001093          | 0.0001114        | 0                         |
| NCF2 | chr1  | 183560204 | G A     | rs55761650                      | P454S     | nonsynonymous     | 0.75 | 0.004066  | 183529339           | 0.004118345 | 0.005930309       | 0.000768787      | 0.000993404               |
| NCF2 | chr1  | 183563229 | T A     | rs35012521                      | N419I     | nonsynonymous     | 28.4 | 0.005324  | 183532364           | 0.005370675 | 0.00550814        | 0.001249279      | 0.00723198                |
| NCF2 | chr1  | 183563301 | C T     | rs145229115                     | R395Q     | nonsynonymous     | 23.4 | 0.001036  | 183532436           | 0.001062568 | 0.00155415        | 0.000480492      | 0                         |
| NCF2 | chr1  | 183563302 | G A     | rs13306575                      | R395W     | nonsynonymous     | 34   | 0.015222  | 183532437           | 0.015108826 | 0.000136329       | 0.001729771      | 0.016180329               |
| NCF2 | chr1  | 183563455 | C T     | rs147908264                     | R386Q     | nonsynonymous     | 13.4 | 0.002271  | 183532590           | 0.002298832 | 0.000818331       | 0.000192345      | 0.008465146               |
| NCF2 | chr1  | 183563531 | T A     | rs147744729                     | T361S     | nonsynonymous     | 26.6 | 0.001892  | 183532666           | 0.001871177 | 0.002114655       | 0.000770861      | 0.001550326               |
| NCF2 | chr1  | 183566954 | A G     | rs35937854                      | V297A     | nonsynonymous     | 22.9 | 0.004115  | 183536089           | 0.003724211 | 0.000122743       | 0.040753556      | 0                         |
| NCF2 | chr1  | 183574503 | G A     | rs376994104                     | A162V     | nonsynonymous     | 35   | 0.000025  | 183543638           | 2.47093E-05 | 2.7265E-05        | 9.60984E-05      | 0                         |
| NCF2 | chr1  | 183590217 | C T     | rs147415774                     | R38Q      | nonsynonymous     | 34   | 0.001408  | 183559352           | 0.001449657 | 0.00226306        | 0.000384468      | 0                         |
| NCF4 | chr22 | 36865055  | C A     | rs112306225                     | T85N      | nonsynonymous     | 7.59 | 0.002867  | 37261097            | 0.002869607 | 0.002720004       | 0.009452348      | 3.98565E-05               |
| NCF4 | chr22 | 36870523  | C T     | rs150976323                     | R151C     | nonsynonymous     | 35   | 0.000056  | 37266565            | 4.9843E-05  | 0                 | 0.000489141      | 3.99616E-05               |
| NCF4 | chr22 | 36875672  | C T     | rs146911421                     | T216M     | nonsynonymous     | 33   | 0.000647  | 37271714            | 0.000649253 | 0.000965144       | 0.000197824      | 7.98021E-05               |

| Mutation                             | ROS           | Age (years)   | Male   | White  | African-American | L1    | L2    | L3     | p     | Duration      | B2    | B3    | Sx    |
|--------------------------------------|---------------|---------------|--------|--------|------------------|-------|-------|--------|-------|---------------|-------|-------|-------|
|                                      | median(IQR)   | median(range) | n(%)   | n(%)   | n(%)             | n(%)  | n(%)  | n(%)   | n(%)  | median(range) | n(%)  | n(%)  | n(%)  |
| <b>No mutation (n=20)</b>            | 571(301,1005) | 9(1-17)       | 13(65) | 17(85) | 3(15)            | 1(5)  | 4(20) | 15(75) | 9(45) | 83(36-130)    | 4(20) | 2(10) | 6(30) |
| <b>CYBA Y72H Hom (n=16)</b>          | 350(198,545)  | 9(2-15)       | 7(50)  | 12(86) | 2(14)            | 1(7)  | 2(14) | 11(79) | 6(43) | 74(35-137)    | 3(21) | 1(7)  | 4(29) |
| <b>NADPH oxidase mutation (n=10)</b> | 329(211,377)  | 9(7-12)       | 8(80)  | 9(90)  | 1(10)            | 1(10) | 3(30) | 6(60)  | 8(80) | 95(55-156)    | 6(60) | 2(20) | 7(70) |
| CYBA Y72H Hom CYBA V76M NCF2 R38Q    | 189           | 9             | 1      | 0      | 1                | 0     | 1     | 0      | 1     | 133           | 1     | 1     | 1     |
| CYBA Y72H Hom NCF2 T361S             | 353           | 12            | 1      | 1      | 0                | 0     | 0     | 1      | 0     | 85            | 0     | 0     | 0     |
| CYBA Y72H Hom NCF2 T361S             | 346           | 8             | 1      | 1      | 0                | 0     | 1     | 0      | 0     | 62            | 0     | 0     | 0     |
| CYBA A101T NCF1 S99G Hom NCF1 G83R   | 349           | 10            | 0      | 1      | 0                | 0     | 1     | 0      | 1     | 104           | 1     | 0     | 1     |
| CYBA K60T                            | 790           | 11            | 1      | 1      | 0                | 0     | 0     | 1      | 1     | 55            | 0     | 0     | 0     |
| NCF1S99G Hom                         | 238           | 7             | 1      | 1      | 0                | 0     | 0     | 1      | 1     | 125           | 1     | 0     | 1     |
| NCF1S99G Hom                         | 312           | 7             | 0      | 1      | 0                | 0     | 0     | 1      | 1     | 81            | 1     | 0     | 1     |
| NCF2 N419I                           | 218           | 9             | 1      | 1      | 0                | 0     | 0     | 1      | 1     | 110           | 1     | 1     | 1     |
| NCF2 P454S                           | 174           | 9             | 1      | 1      | 0                | 0     | 0     | 1      | 1     | 156           | 0     | 0     | 1     |
| NCF4 T85N                            | 448           | 10            | 1      | 1      | 0                | 1     | 0     | 0      | 1     | 71            | 1     | 0     | 1     |

Hom: homozygous carriage  
Remainder are heterozygous

ROS: fMLP induced neutrophil ROS production

L1: ileal location

L2: colon-only location

L3: ileo-colonic location

p: perianal disease

B2: stricturing behavior

B3: internal penetrating behavior

Sx: surgery

| Gene Symbol | LowROS CD v NormROS CD |                      | NormROS CD v CTRL   |                      | LowROS CD v CTRL    |                      |
|-------------|------------------------|----------------------|---------------------|----------------------|---------------------|----------------------|
|             | P-value                | FC                   | P-value             | FC                   | P-value             | FC                   |
| A1CF        | 0.729                  | -1.075               | <b>0.047</b>        | <b>1.636</b>         | 0.127               | 1.522                |
| A2M         | <b><u>0.044</u></b>    | <b><u>2.377</u></b>  | 0.884               | -1.132               | 0.389               | 2.099                |
| AAAS        | <b>0.031</b>           | <b>1.898</b>         | 0.547               | -1.326               | 0.407               | 1.432                |
| AAR2        | 0.452                  | 1.297                | <b>0.004</b>        | <b>-3.029</b>        | <b>0.011</b>        | <b>-2.336</b>        |
| ABCB6       | 0.891                  | -1.027               | <b>0.017</b>        | <b>-1.669</b>        | <b>0.006</b>        | <b>-1.714</b>        |
| ABCC5       | <b><u>0.037</u></b>    | <b><u>1.593</u></b>  | 0.929               | -1.020               | <b><u>0.029</u></b> | <b><u>1.563</u></b>  |
| ABCF1       | 0.991                  | -1.003               | <b><u>0.026</u></b> | <b><u>-1.694</u></b> | <b><u>0.020</u></b> | <b><u>-1.699</u></b> |
| ABCF3       | 0.443                  | 1.153                | <b>0.007</b>        | <b>-1.621</b>        | <b>0.034</b>        | -1.406               |
| ABHD10      | <b>0.041</b>           | <b>1.846</b>         | 0.270               | -1.642               | 0.757               | 1.124                |
| ABHD12      | 0.561                  | -1.226               | <b>0.029</b>        | <b>-3.325</b>        | <b>0.015</b>        | <b>-4.075</b>        |
| ABHD17B     | 0.088                  | -1.227               | 0.161               | -1.252               | <b>0.025</b>        | <b>-1.536</b>        |
| ABI3        | <b>0.011</b>           | <b>2.086</b>         | 0.536               | -1.318               | 0.301               | 1.582                |
| ABT1        | <b>0.037</b>           | 1.409                | <b>0.029</b>        | <b>-2.069</b>        | 0.184               | -1.469               |
| ABTB2       | 0.692                  | 1.103                | 0.087               | 1.825                | <b>0.038</b>        | <b>2.013</b>         |
| ACAD8       | <b><u>0.012</u></b>    | <b><u>1.559</u></b>  | <b><u>0.035</u></b> | <b><u>-1.747</u></b> | 0.599               | -1.121               |
| ACAT2       | 0.242                  | -1.425               | <b><u>0.006</u></b> | <b><u>-2.159</u></b> | <b><u>0.000</u></b> | <b><u>-3.076</u></b> |
| ACD         | <b>0.039</b>           | <b>2.182</b>         | 0.098               | -2.054               | 0.882               | 1.062                |
| ACOX1       | 0.210                  | 1.341                | 0.193               | 1.344                | <b><u>0.023</u></b> | <b><u>1.801</u></b>  |
| ACPP        | <b>0.031</b>           | <b>1.555</b>         | 0.908               | 1.023                | <b>0.029</b>        | <b>1.590</b>         |
| ACSL3       | <b><u>0.015</u></b>    | <b><u>-1.590</u></b> | 0.847               | -1.076               | 0.186               | -1.711               |
| ACSM3       | 0.227                  | -1.429               | 0.200               | -1.488               | <b>0.038</b>        | <b>-2.127</b>        |
| ACSS2       | <b><u>0.018</u></b>    | <b><u>1.616</u></b>  | 0.869               | -1.035               | <b><u>0.031</u></b> | <b><u>1.562</u></b>  |
| ACTG1P4     | 0.587                  | -1.148               | <b>0.000</b>        | <b>3.276</b>         | <b>0.001</b>        | <b>2.854</b>         |
| ACTR3B      | <b>0.004</b>           | <b>2.059</b>         | 0.755               | -1.173               | 0.271               | 1.756                |
| ACTR3C      | <b>0.048</b>           | <b>1.650</b>         | 0.641               | 1.128                | <b>0.016</b>        | <b>1.862</b>         |
| ACYP1       | <b>0.012</b>           | <b>2.593</b>         | 0.279               | -1.636               | 0.365               | 1.584                |
| ADAM10      | 0.113                  | 1.260                | 0.308               | 1.192                | <b><u>0.035</u></b> | <b><u>1.502</u></b>  |
| ADCY10      | 0.458                  | 1.227                | 0.074               | 1.922                | <b><u>0.024</u></b> | <b><u>2.357</u></b>  |
| ADNP2       | 0.145                  | -1.321               | 0.173               | -1.333               | <b>0.009</b>        | <b>-1.762</b>        |
| ADPRHL2     | 0.949                  | -1.021               | <b>0.024</b>        | <b>-1.786</b>        | <b>0.025</b>        | <b>-1.824</b>        |
| AEN         | 0.755                  | -1.139               | <b>0.008</b>        | <b>-3.246</b>        | <b>0.001</b>        | <b>-3.699</b>        |
| AFF1        | 0.530                  | -1.114               | <b>0.009</b>        | <b>1.755</b>         | <b>0.022</b>        | <b>1.576</b>         |
| AFG3L2      | 0.593                  | 1.211                | <b><u>0.038</u></b> | <b><u>-2.314</u></b> | 0.099               | -1.911               |
| AGL         | <b><u>0.019</u></b>    | <b><u>1.535</u></b>  | 0.980               | -1.008               | 0.233               | 1.522                |
| AGPAT6      | 0.154                  | -1.491               | 0.149               | -1.541               | <b>0.013</b>        | <b>-2.298</b>        |
| AK8         | <b>0.043</b>           | <b>-1.501</b>        | 0.565               | -1.295               | 0.164               | -1.943               |
| AKAP10      | 0.134                  | 1.346                | 0.315               | 1.172                | <b>0.016</b>        | <b>1.578</b>         |

|                |                     |                     |                     |                      |              |               |
|----------------|---------------------|---------------------|---------------------|----------------------|--------------|---------------|
| AKAP14         | 0.881               | -1.048              | <b>0.005</b>        | <b>-2.810</b>        | <b>0.005</b> | <b>-2.946</b> |
| AKT1S1         | <b><u>0.018</u></b> | <b><u>1.805</u></b> | <b><u>0.044</u></b> | <b><u>-1.727</u></b> | 0.803        | 1.045         |
| ALG1L2         | <b>0.022</b>        | <b>1.725</b>        | 0.650               | -1.118               | 0.069        | 1.542         |
| ALG6           | 0.055               | 1.391               | 0.639               | 1.091                | <b>0.047</b> | <b>1.518</b>  |
| ALKBH2         | <b>0.010</b>        | <b>-2.613</b>       | 0.936               | 1.044                | 0.109        | -2.503        |
| ALKBH5         | 0.546               | 1.111               | <b>0.006</b>        | <b>-1.577</b>        | <b>0.016</b> | -1.420        |
| ALOX12         | 0.548               | 1.112               | <b><u>0.016</u></b> | <b><u>-1.565</u></b> | 0.066        | -1.408        |
| AMICA1         | 0.204               | 1.461               | 0.240               | 1.444                | <b>0.029</b> | <b>2.110</b>  |
| AMMECR1L       | <b>0.027</b>        | <b>1.562</b>        | 0.824               | -1.081               | 0.271        | 1.445         |
| ANAPC5         | 0.130               | 1.411               | <b>0.030</b>        | <b>-1.843</b>        | 0.243        | -1.306        |
| ANGPTL2        | <b>0.046</b>        | <b>1.871</b>        | 0.663               | -1.318               | 0.556        | 1.420         |
| ANGPTL7        | 0.460               | 1.245               | <b>0.028</b>        | <b>-1.823</b>        | 0.169        | -1.464        |
| ANKK1          | <b>0.039</b>        | <b>-1.577</b>       | 0.156               | 1.893                | 0.660        | 1.200         |
| ANKRD55        | 0.214               | 1.514               | 0.369               | 1.443                | <b>0.043</b> | <b>2.185</b>  |
| ANKRD61        | 0.238               | 1.510               | <b>0.000</b>        | <b>-3.537</b>        | <b>0.008</b> | <b>-2.343</b> |
| ANKRD65        | 0.623               | 1.063               | <b>0.034</b>        | 1.488                | <b>0.020</b> | <b>1.581</b>  |
| ANP32B         | 0.866               | 1.027               | <b>0.013</b>        | <b>-1.838</b>        | <b>0.015</b> | <b>-1.789</b> |
| ANP32C         | 0.273               | 1.290               | <b>0.035</b>        | <b>1.778</b>         | <b>0.007</b> | <b>2.294</b>  |
| ANXA4          | <b>0.014</b>        | <b>1.520</b>        | 0.457               | -1.280               | 0.602        | 1.188         |
| ANXA9          | <b>0.017</b>        | <b>2.312</b>        | 0.964               | 1.026                | 0.141        | 2.373         |
| AP1AR          | <b>0.034</b>        | <b>-1.663</b>       | <b>0.020</b>        | <b>1.991</b>         | 0.458        | 1.197         |
| AP2M1          | <b>0.024</b>        | 1.396               | <b><u>0.028</u></b> | <b><u>-1.506</u></b> | 0.599        | -1.079        |
| AP4M1          | 0.223               | -1.134              | <b>0.006</b>        | <b>-1.582</b>        | <b>0.001</b> | <b>-1.794</b> |
| AP5S1          | 0.672               | 1.067               | <b>0.003</b>        | <b>-1.605</b>        | <b>0.005</b> | <b>-1.504</b> |
| APBA3          | <b>0.037</b>        | <b>1.924</b>        | 0.469               | -1.428               | 0.526        | 1.347         |
| API5           | <b>0.050</b>        | <b>1.553</b>        | 0.480               | -1.252               | 0.463        | 1.241         |
| APOL1          | 0.624               | -1.076              | <b>0.004</b>        | <b>1.823</b>         | <b>0.007</b> | <b>1.694</b>  |
| APOL2          | 0.877               | -1.034              | <b>0.007</b>        | <b>1.927</b>         | <b>0.010</b> | <b>1.864</b>  |
| APOL6          | 0.379               | -1.240              | <b>0.006</b>        | <b>2.176</b>         | <b>0.023</b> | <b>1.754</b>  |
| APOM           | 0.083               | -1.367              | 0.151               | -1.320               | <b>0.013</b> | <b>-1.805</b> |
| APTX           | 0.277               | 1.312               | <b>0.028</b>        | <b>-1.728</b>        | 0.053        | -1.317        |
| AQP9           | 0.726               | -1.055              | <b>0.033</b>        | <b>1.555</b>         | 0.079        | 1.475         |
| AREG           | 0.062               | -1.854              | 0.144               | -2.763               | <b>0.035</b> | <b>-5.122</b> |
| ARHGAP26-AS1   | 0.951               | 1.014               | <b>0.000</b>        | <b>1.752</b>         | <b>0.011</b> | <b>1.776</b>  |
| ARL13A         | <b>0.012</b>        | <b>2.404</b>        | 0.774               | 1.124                | <b>0.043</b> | <b>2.701</b>  |
| ARMCX5-GPRASP2 | <b>0.038</b>        | <b>1.911</b>        | 0.550               | -1.270               | 0.349        | 1.505         |
| ARPC5          | 0.187               | 1.323               | 0.221               | 1.364                | <b>0.031</b> | <b>1.805</b>  |
| ARPC5L         | 0.469               | -1.197              | <b>0.033</b>        | <b>-1.670</b>        | <b>0.010</b> | <b>-1.998</b> |
| ARRDC2         | 0.315               | -1.295              | <b>0.013</b>        | <b>-2.240</b>        | <b>0.002</b> | <b>-2.902</b> |

|           |              |              |              |               |              |               |
|-----------|--------------|--------------|--------------|---------------|--------------|---------------|
| ARSF      | 0.109        | -1.342       | 0.075        | -1.465        | <b>0.005</b> | <b>-1.966</b> |
| ASAP1-IT1 | 0.103        | 1.304        | 0.140        | 1.495         | <b>0.026</b> | <b>1.949</b>  |
| ASB1      | <b>0.034</b> | <b>1.756</b> | 0.852        | -1.074        | 0.204        | 1.635         |
| ASF1B     | <b>0.028</b> | <b>1.974</b> | 0.566        | 1.384         | 0.098        | 2.732         |
| ASNSD1    | 0.128        | 1.262        | <b>0.038</b> | <b>-1.651</b> | 0.205        | -1.309        |
| ASPH      | <u>0.020</u> | <u>1.562</u> | 0.996        | 1.002         | 0.309        | 1.565         |
| ATF1      | 0.511        | 1.125        | <b>0.046</b> | <b>1.669</b>  | <b>0.022</b> | <b>1.877</b>  |
| ATF4P4    | 0.282        | -1.313       | 0.201        | -1.360        | <b>0.044</b> | <b>-1.786</b> |
| ATF6      | 0.166        | 1.264        | 0.219        | 1.278         | <b>0.037</b> | <b>1.615</b>  |
| ATG16L1   | 0.872        | -1.034       | <b>0.023</b> | <b>-1.508</b> | <b>0.013</b> | <b>-1.559</b> |
| ATG2A     | 0.387        | -1.314       | <b>0.026</b> | <b>-1.686</b> | <b>0.013</b> | <b>-2.216</b> |
| ATG9A     | 0.665        | -1.070       | <b>0.015</b> | <b>-1.516</b> | <b>0.007</b> | <b>-1.622</b> |
| ATL2      | 0.777        | -1.050       | <b>0.003</b> | <b>-1.627</b> | <b>0.001</b> | <b>-1.709</b> |
| ATP10D    | 0.539        | 1.243        | 0.068        | 1.878         | <b>0.008</b> | <b>2.334</b>  |
| ATP2C2    | <b>0.008</b> | <b>2.209</b> | <b>0.024</b> | <b>-2.755</b> | 0.569        | -1.247        |
| ATP8A2P3  | 0.718        | 1.204        | <b>0.026</b> | <b>-2.456</b> | 0.070        | -2.040        |
| ATPIF1    | <b>0.011</b> | <b>1.532</b> | 0.446        | -1.180        | 0.219        | 1.298         |
| ATXN2L    | 0.497        | -1.116       | 0.067        | -1.410        | <b>0.027</b> | <b>-1.573</b> |
| ATXN7L3B  | 0.455        | 1.132        | <b>0.025</b> | <b>-1.626</b> | 0.075        | -1.436        |
| AUP1      | 0.239        | 1.281        | <b>0.049</b> | <b>-1.766</b> | 0.176        | -1.379        |
| AVL9      | 0.138        | 1.292        | 0.143        | 1.283         | <b>0.005</b> | <b>1.657</b>  |
| AZI1      | 0.687        | -1.140       | <b>0.011</b> | <b>-2.332</b> | <b>0.007</b> | <b>-2.660</b> |
| B3GNT4    | 0.841        | 1.069        | <u>0.019</u> | <u>-2.266</u> | <u>0.042</u> | <u>-2.121</u> |
| B4GALT1   | 0.185        | -1.281       | <b>0.041</b> | -1.380        | <b>0.004</b> | <b>-1.769</b> |
| BAD       | 0.726        | 1.105        | <u>0.003</u> | <u>-1.823</u> | <u>0.042</u> | <u>-1.650</u> |
| BAGE2     | 0.983        | -1.003       | <b>0.044</b> | <b>1.748</b>  | <b>0.047</b> | <b>1.743</b>  |
| BAMBI     | 0.562        | 1.235        | <b>0.000</b> | <b>-8.125</b> | <b>0.000</b> | <b>-6.579</b> |
| BARD1     | <b>0.046</b> | <b>2.079</b> | 0.265        | -1.992        | 0.940        | 1.044         |
| BBS1      | 0.381        | 1.303        | 0.090        | 2.766         | <b>0.040</b> | <b>3.605</b>  |
| BBS12     | <b>0.050</b> | <b>2.137</b> | 0.222        | -1.952        | 0.873        | 1.095         |
| BCAT2     | 0.538        | -1.125       | <u>0.045</u> | <u>-1.527</u> | <u>0.028</u> | <u>-1.719</u> |
| BCCIP     | 0.984        | 1.006        | <b>0.014</b> | <b>-2.195</b> | <b>0.007</b> | <b>-2.182</b> |
| BCL11A    | <b>0.044</b> | <b>1.680</b> | 0.851        | -1.102        | 0.424        | 1.525         |
| BCL2L13   | 0.722        | -1.047       | <b>0.041</b> | <b>1.603</b>  | 0.062        | 1.531         |
| BCL9L     | 0.192        | -1.493       | 0.064        | -2.221        | <b>0.010</b> | <b>-3.316</b> |
| BCS1L     | <b>0.013</b> | <b>2.124</b> | <b>0.014</b> | <b>-2.650</b> | 0.503        | -1.248        |
| BEX1      | 0.578        | 1.267        | <b>0.001</b> | <b>-5.609</b> | <b>0.005</b> | <b>-4.426</b> |
| BIRC3     | 0.152        | -1.558       | <b>0.016</b> | <b>-1.852</b> | <b>0.001</b> | <b>-2.887</b> |
| BLCAP     | 0.448        | 1.143        | <b>0.010</b> | <b>-1.689</b> | 0.064        | -1.478        |

|           |                     |                     |                     |                      |                     |                      |
|-----------|---------------------|---------------------|---------------------|----------------------|---------------------|----------------------|
| BLM       | 0.080               | -1.558              | 0.083               | -2.014               | <b>0.012</b>        | <b>-3.137</b>        |
| BLOC1S1   | <b>0.024</b>        | <b>1.997</b>        | 0.323               | 1.685                | <b>0.036</b>        | <b>3.363</b>         |
| BLOC1S4   | 0.282               | 1.476               | <b>0.049</b>        | <b>-2.073</b>        | 0.318               | -1.404               |
| BLVRA     | 0.449               | -1.204              | <b>0.041</b>        | <b>-1.677</b>        | <b>0.014</b>        | <b>-2.020</b>        |
| BMF       | 0.912               | -1.028              | <b>0.022</b>        | <b>-1.920</b>        | <b>0.009</b>        | <b>-1.974</b>        |
| BMI1      | 0.145               | 1.496               | <u><b>0.024</b></u> | <u><b>-2.674</b></u> | 0.132               | -1.788               |
| BMP2      | 0.424               | -1.405              | <u><b>0.033</b></u> | <u><b>-2.053</b></u> | <u><b>0.011</b></u> | <u><b>-2.885</b></u> |
| BMP2K     | 0.319               | 1.203               | 0.118               | 1.442                | <b>0.032</b>        | <b>1.735</b>         |
| BMP6      | 0.551               | 1.158               | <u><b>0.040</b></u> | <u><b>-1.741</b></u> | 0.100               | -1.503               |
| BOD1      | 0.504               | 1.264               | <b>0.001</b>        | <b>-2.961</b>        | <b>0.003</b>        | <b>-2.343</b>        |
| BRD9      | 0.080               | 1.517               | <b>0.039</b>        | <b>-2.279</b>        | 0.224               | -1.502               |
| BRF2      | <b>0.025</b>        | <b>1.918</b>        | <b>0.035</b>        | <b>-1.912</b>        | 0.988               | 1.003                |
| BRI3BP    | <b>0.007</b>        | <b>2.144</b>        | 0.802               | -1.150               | 0.278               | 1.865                |
| BRMS1     | 0.282               | -1.142              | 0.051               | -1.656               | <b>0.020</b>        | <b>-1.891</b>        |
| BRPF1     | 0.173               | 1.402               | <b>0.041</b>        | <b>-1.770</b>        | 0.142               | -1.263               |
| BSDC1     | 0.343               | 1.110               | <b>0.003</b>        | <b>-1.632</b>        | <b>0.013</b>        | -1.471               |
| BTN3A3    | 0.272               | 1.394               | 0.169               | 1.612                | <b>0.011</b>        | <b>2.248</b>         |
| BTRC      | <u><b>0.010</b></u> | <u><b>2.080</b></u> | 0.771               | -1.195               | 0.364               | 1.740                |
| C10orf105 | 0.529               | -1.144              | <b>0.040</b>        | -1.315               | <b>0.040</b>        | <b>-1.504</b>        |
| C10orf131 | <b>0.013</b>        | <b>2.081</b>        | 0.737               | 1.113                | <b>0.005</b>        | <b>2.315</b>         |
| C10orf55  | 0.541               | -1.423              | <b>0.002</b>        | <b>-4.661</b>        | <b>0.002</b>        | <b>-6.630</b>        |
| C12orf61  | 0.171               | -1.630              | <b>0.001</b>        | <b>-3.853</b>        | <b>0.000</b>        | <b>-6.279</b>        |
| C14orf1   | 0.144               | 1.483               | <b>0.022</b>        | <b>-2.165</b>        | 0.160               | -1.460               |
| C16orf74  | <b>0.031</b>        | <b>1.567</b>        | 0.599               | -1.285               | 0.689               | 1.220                |
| C16orf93  | <b>0.024</b>        | <b>1.762</b>        | 0.348               | 1.678                | 0.068               | 2.957                |
| C17orf102 | 0.591               | 1.146               | <b>0.003</b>        | <b>3.800</b>         | <b>0.002</b>        | <b>4.356</b>         |
| C17orf96  | <b>0.018</b>        | <b>-2.690</b>       | 0.520               | 1.548                | 0.410               | -1.738               |
| C19orf25  | <b>0.043</b>        | <b>1.859</b>        | 0.273               | 1.398                | <b>0.010</b>        | <b>2.598</b>         |
| C19orf47  | <b>0.007</b>        | <b>1.580</b>        | 0.457               | -1.342               | 0.666               | 1.178                |
| C19orf48  | 0.793               | 1.057               | <b>0.037</b>        | <b>-1.879</b>        | <b>0.040</b>        | <b>-1.777</b>        |
| C1orf111  | <b>0.034</b>        | <b>1.818</b>        | 0.523               | -1.367               | 0.589               | 1.330                |
| C1orf141  | 0.113               | -1.341              | 0.427               | -1.164               | <b>0.046</b>        | <b>-1.561</b>        |
| C1orf50   | <b>0.023</b>        | <b>2.231</b>        | 0.308               | -1.587               | 0.448               | 1.405                |
| C1orf56   | 0.310               | -1.160              | <b>0.005</b>        | <b>-1.652</b>        | <b>0.001</b>        | <b>-1.916</b>        |
| C1orf74   | 0.840               | -1.075              | <b>0.002</b>        | <b>-2.765</b>        | <b>0.003</b>        | <b>-2.973</b>        |
| C1QL3     | <b>0.025</b>        | <b>2.300</b>        | 0.739               | -1.198               | 0.260               | 1.919                |
| C20orf196 | <b>0.049</b>        | <b>1.980</b>        | 0.385               | -1.521               | 0.592               | 1.302                |
| C21orf67  | <b>0.010</b>        | <b>2.141</b>        | 0.314               | -1.974               | 0.902               | 1.085                |
| C21orf91  | 0.659               | -1.088              | <b>0.020</b>        | <b>1.563</b>         | 0.089               | 1.437                |

|          |              |               |              |               |              |               |
|----------|--------------|---------------|--------------|---------------|--------------|---------------|
| C22orf26 | <b>0.033</b> | <b>2.072</b>  | 0.203        | -1.815        | 0.777        | 1.141         |
| C22orf34 | 0.626        | -1.099        | <b>0.049</b> | <b>2.201</b>  | 0.075        | 2.003         |
| C2orf47  | 0.769        | -1.078        | <b>0.003</b> | <b>-2.246</b> | <b>0.004</b> | <b>-2.422</b> |
| C2orf69  | 0.294        | 1.139         | <b>0.004</b> | <b>-1.519</b> | <b>0.038</b> | -1.334        |
| C4A      | 0.366        | 1.248         | 0.136        | 1.481         | <b>0.020</b> | <b>1.848</b>  |
| C5orf56  | 0.516        | -1.109        | <b>0.026</b> | <b>1.552</b>  | 0.075        | 1.399         |
| C6orf203 | 0.211        | 1.643         | <b>0.043</b> | <b>-2.372</b> | 0.400        | -1.444        |
| C7orf10  | <b>0.043</b> | <b>2.014</b>  | 0.581        | -1.353        | 0.486        | 1.489         |
| C7orf26  | <b>0.007</b> | <b>1.541</b>  | 0.095        | -1.465        | 0.794        | 1.051         |
| C8orf76  | 0.623        | 1.107         | <b>0.049</b> | <b>-1.505</b> | 0.085        | -1.359        |
| C9orf50  | <b>0.031</b> | <b>-1.629</b> | 0.688        | 1.182         | 0.422        | -1.378        |
| CAAP1    | 0.116        | -1.785        | <b>0.016</b> | <b>-2.159</b> | <b>0.001</b> | <b>-3.853</b> |
| CAB39    | 0.274        | 1.208         | 0.121        | 1.246         | <b>0.019</b> | <b>1.505</b>  |
| CACNA1A  | 0.618        | -1.131        | <b>0.005</b> | <b>2.458</b>  | <b>0.009</b> | <b>2.174</b>  |
| CACNA1E  | 0.466        | 1.160         | 0.083        | 1.632         | <b>0.038</b> | <b>1.893</b>  |
| CAHM     | <b>0.012</b> | <b>2.018</b>  | 0.906        | 1.046         | 0.054        | 2.110         |
| CARHSP1  | 0.134        | 1.298         | <b>0.030</b> | <b>-1.717</b> | 0.198        | -1.323        |
| CARM1    | 0.723        | 1.151         | <b>0.016</b> | <b>-2.480</b> | <b>0.022</b> | <b>-2.155</b> |
| CASP4    | 0.639        | 1.112         | <b>0.011</b> | <b>2.001</b>  | <b>0.005</b> | <b>2.225</b>  |
| CAT      | 0.227        | 1.384         | 0.136        | 1.475         | <b>0.012</b> | <b>2.042</b>  |
| CBR4     | 0.156        | 1.187         | 0.108        | 1.349         | <b>0.021</b> | <b>1.602</b>  |
| CBWD2    | 0.840        | 1.041         | 0.052        | 1.507         | <b>0.046</b> | <b>1.569</b>  |
| CBWD3    | 0.361        | 1.227         | 0.137        | 1.428         | <b>0.034</b> | <b>1.751</b>  |
| CBWD4P   | 0.248        | 1.423         | 0.239        | 1.399         | <b>0.017</b> | <b>1.991</b>  |
| CBWD5    | 0.525        | 1.140         | <b>0.017</b> | <b>1.666</b>  | <b>0.007</b> | <b>1.899</b>  |
| CBWD7    | 0.439        | 1.176         | <b>0.024</b> | <b>1.648</b>  | <b>0.006</b> | <b>1.937</b>  |
| CBX4     | 0.203        | -1.284        | 0.169        | -1.359        | <b>0.027</b> | <b>-1.744</b> |
| CCBL2    | 0.088        | 1.260         | 0.064        | 1.392         | <b>0.005</b> | <b>1.753</b>  |
| CCDC112  | <b>0.033</b> | <b>1.520</b>  | 0.323        | -1.389        | 0.769        | 1.094         |
| CCDC117  | 0.580        | -1.106        | <b>0.002</b> | <b>-1.576</b> | <b>0.000</b> | <b>-1.743</b> |
| CCDC134  | 0.879        | -1.075        | <b>0.001</b> | <b>-3.098</b> | <b>0.009</b> | <b>-3.331</b> |
| CCDC138  | 0.495        | 1.194         | <b>0.005</b> | <b>-2.280</b> | <b>0.024</b> | <b>-1.910</b> |
| CCDC157  | <b>0.031</b> | <b>2.086</b>  | 0.335        | -1.666        | 0.680        | 1.252         |
| CCDC170  | 0.239        | 1.302         | <b>0.011</b> | <b>-1.642</b> | 0.300        | -1.262        |
| CCDC180  | 0.122        | 1.586         | <b>0.025</b> | <b>-2.010</b> | 0.382        | -1.267        |
| CCDC28A  | 0.287        | -1.191        | 0.082        | -1.347        | <b>0.018</b> | <b>-1.605</b> |
| CCDC59   | 0.633        | -1.103        | <b>0.040</b> | <b>-1.547</b> | <b>0.011</b> | <b>-1.705</b> |
| CCDC96   | <b>0.029</b> | <b>1.782</b>  | 0.153        | 2.308         | <b>0.031</b> | <b>4.113</b>  |
| CCL4     | 0.726        | 1.156         | <b>0.018</b> | <b>-2.845</b> | <b>0.038</b> | <b>-2.462</b> |

|          |                     |                     |                     |                      |                     |                      |
|----------|---------------------|---------------------|---------------------|----------------------|---------------------|----------------------|
| CCNB2    | <b>0.023</b>        | <b>1.995</b>        | 0.456               | -1.402               | 0.388               | 1.423                |
| CCNL2    | 0.197               | 1.157               | <b>0.004</b>        | <b>-1.569</b>        | <b>0.037</b>        | -1.356               |
| CCR1     | 0.889               | -1.045              | <b>0.004</b>        | <b>4.319</b>         | <b>0.005</b>        | <b>4.132</b>         |
| CCR2     | <b>0.043</b>        | <b>2.277</b>        | 0.486               | 1.411                | <b>0.044</b>        | <b>3.213</b>         |
| CCRL2    | 0.599               | 1.173               | <b>0.046</b>        | <b>-1.833</b>        | 0.113               | -1.563               |
| CCT2     | 0.294               | -1.301              | 0.082               | -1.801               | <b>0.018</b>        | <b>-2.343</b>        |
| CCT4     | 0.413               | 1.226               | <b>0.015</b>        | <b>-1.862</b>        | <b>0.008</b>        | <b>-1.518</b>        |
| CCT6B    | 0.650               | -1.172              | <b>0.047</b>        | <b>-2.042</b>        | <b>0.015</b>        | <b>-2.395</b>        |
| CD14     | <u><b>0.022</b></u> | <u><b>2.038</b></u> | 0.122               | 1.617                | <u><b>0.000</b></u> | <u><b>3.295</b></u>  |
| CD200R1  | <b>0.023</b>        | <b>2.731</b>        | 0.414               | -1.699               | 0.491               | 1.607                |
| CD274    | 0.140               | -1.701              | <b>0.000</b>        | <b>4.654</b>         | <b>0.007</b>        | <b>2.735</b>         |
| CD300A   | 0.439               | 1.192               | 0.107               | 1.506                | <b>0.038</b>        | <b>1.796</b>         |
| CD300LF  | 0.458               | 1.167               | 0.095               | 1.371                | <b>0.019</b>        | <b>1.600</b>         |
| CD320    | 0.289               | -1.198              | 0.155               | -1.260               | <u><b>0.049</b></u> | <u><b>-1.509</b></u> |
| CD58     | 0.701               | -1.049              | <u><b>0.032</b></u> | <u><b>1.531</b></u>  | 0.055               | 1.459                |
| CD7      | 0.193               | -1.392              | <b>0.031</b>        | <b>2.021</b>         | 0.249               | 1.451                |
| CD83     | 0.335               | -1.618              | <b>0.029</b>        | <b>-2.711</b>        | <b>0.004</b>        | <b>-4.386</b>        |
| CD9      | <b>0.006</b>        | <b>3.315</b>        | 0.735               | -1.275               | 0.211               | 2.600                |
| CDC20    | <b>0.036</b>        | <b>1.830</b>        | 0.950               | -1.033               | 0.282               | 1.771                |
| CDC42EP2 | 0.401               | 1.399               | 0.077               | 3.323                | <b>0.032</b>        | <b>4.648</b>         |
| CDCA4    | 0.787               | 1.096               | <b>0.006</b>        | <b>-3.600</b>        | <b>0.013</b>        | <b>-3.284</b>        |
| CDCA8    | <b>0.010</b>        | <b>2.076</b>        | 0.118               | -2.217               | 0.882               | -1.068               |
| CDH13    | <b>0.019</b>        | <b>2.195</b>        | 0.925               | -1.065               | 0.300               | 2.060                |
| CDH17    | 0.464               | -1.109              | 0.068               | -1.399               | <b>0.024</b>        | <b>-1.552</b>        |
| CDIP1    | <b>0.032</b>        | <b>2.077</b>        | <b>0.044</b>        | <b>-2.063</b>        | 0.980               | 1.007                |
| CDIPT    | 0.189               | 1.596               | 0.880               | 1.047                | <u><b>0.050</b></u> | <u><b>1.671</b></u>  |
| CDK11A   | 0.873               | -1.023              | <b>0.001</b>        | -1.493               | <u><b>0.002</b></u> | <u><b>-1.528</b></u> |
| CDK16    | 0.730               | -1.082              | <u><b>0.022</b></u> | <u><b>-1.556</b></u> | <u><b>0.011</b></u> | <u><b>-1.683</b></u> |
| CDK2AP1  | 0.192               | 1.246               | <b>0.040</b>        | <b>-2.080</b>        | 0.123               | -1.670               |
| CDK2AP2  | <b>0.032</b>        | <b>1.983</b>        | 0.706               | -1.178               | 0.218               | 1.683                |
| CDK3     | 0.273               | 1.375               | <u><b>0.005</b></u> | <u><b>-2.436</b></u> | <u><b>0.030</b></u> | <u><b>-1.772</b></u> |
| CDK7     | 0.244               | -1.234              | 0.208               | -1.245               | <u><b>0.022</b></u> | <u><b>-1.537</b></u> |
| CDKN1A   | 0.191               | -2.066              | <u><b>0.015</b></u> | <u><b>-2.934</b></u> | <u><b>0.001</b></u> | <u><b>-6.064</b></u> |
| CEACAM21 | <b>0.016</b>        | <b>2.275</b>        | 0.753               | -1.228               | 0.361               | 1.854                |
| CEACAM3  | 0.220               | 1.274               | 0.195               | 1.305                | <b>0.024</b>        | <b>1.663</b>         |
| CEBPE    | <b>0.030</b>        | <b>2.006</b>        | 0.639               | -1.285               | 0.444               | 1.561                |
| CEBPZ    | 0.338               | -1.326              | 0.221               | -1.456               | <b>0.039</b>        | <b>-1.930</b>        |
| CENPC    | 0.575               | -1.114              | 0.081               | -1.395               | <b>0.012</b>        | <b>-1.554</b>        |
| CFB      | <b>0.020</b>        | <b>1.790</b>        | 0.295               | -1.389               | 0.342               | 1.289                |



|             |              |              |              |               |              |               |
|-------------|--------------|--------------|--------------|---------------|--------------|---------------|
| CFD         | 0.361        | 1.534        | <b>0.037</b> | <b>4.297</b>  | <b>0.011</b> | <b>6.593</b>  |
| CFH         | <b>0.044</b> | <b>2.513</b> | 0.371        | -1.904        | 0.694        | 1.320         |
| CGRRF1      | 0.163        | -1.395       | 0.258        | -1.295        | <b>0.018</b> | <b>-1.807</b> |
| CHAC2       | 0.145        | 1.456        | <b>0.033</b> | <b>-2.056</b> | 0.190        | -1.412        |
| CHAF1A      | 0.888        | -1.022       | <b>0.022</b> | <b>-1.555</b> | <b>0.017</b> | <b>-1.590</b> |
| CHCHD10     | 0.513        | 1.260        | <b>0.013</b> | <b>-3.322</b> | <b>0.045</b> | <b>-2.637</b> |
| CHEK1       | 0.186        | -1.149       | 0.132        | -1.331        | <u>0.040</u> | <u>-1.530</u> |
| CHGA        | 0.225        | 1.439        | 0.122        | 2.014         | <b>0.026</b> | <b>2.898</b>  |
| CHKA        | 0.226        | -1.178       | <u>0.031</u> | <u>-1.645</u> | <b>0.009</b> | <u>-1.938</u> |
| CHST13      | <b>0.047</b> | <b>1.552</b> | 0.675        | -1.133        | 0.341        | 1.370         |
| CHTF18      | <b>0.019</b> | <b>2.166</b> | 0.472        | 1.646         | 0.090        | 3.564         |
| CIAPIN1     | 0.121        | 1.571        | <b>0.000</b> | <b>-3.599</b> | <b>0.001</b> | <b>-2.291</b> |
| CILP        | <b>0.048</b> | <b>2.125</b> | 0.809        | -1.171        | 0.380        | 1.815         |
| CIRBP       | 0.578        | 1.086        | <b>0.002</b> | <b>-1.567</b> | <b>0.006</b> | -1.443        |
| CIRH1A      | 0.559        | -1.157       | <b>0.020</b> | <b>-1.886</b> | <b>0.010</b> | <b>-2.182</b> |
| CISD1       | 0.354        | 1.364        | 0.108        | 2.648         | <b>0.041</b> | <b>3.613</b>  |
| CISH        | 0.699        | 1.107        | 0.054        | 3.278         | <b>0.040</b> | <b>3.628</b>  |
| CKLF-CMTM1  | 0.148        | -2.598       | 0.081        | -1.864        | <b>0.011</b> | <b>-4.844</b> |
| CLC         | 0.744        | 1.145        | <b>0.021</b> | <b>-4.690</b> | <b>0.035</b> | <b>-4.094</b> |
| CMPK1       | 0.138        | 1.332        | <u>0.021</u> | <u>-1.643</u> | 0.172        | -1.234        |
| CNGA1       | 0.444        | -1.132       | <b>0.001</b> | <b>2.085</b>  | <b>0.003</b> | <b>1.842</b>  |
| CNOT11      | 0.750        | 1.056        | <b>0.029</b> | 1.453         | <b>0.027</b> | <b>1.535</b>  |
| CNPY2       | 0.166        | -1.478       | 0.250        | -1.373        | <b>0.035</b> | <b>-2.030</b> |
| CNR1        | <b>0.025</b> | <b>3.280</b> | 0.682        | 1.400         | 0.091        | 4.590         |
| CNTF        | 0.081        | -1.372       | 0.516        | -1.105        | <b>0.040</b> | <b>-1.516</b> |
| COL10A1     | 0.113        | 1.609        | 0.265        | 1.460         | <b>0.012</b> | <b>2.348</b>  |
| COL1A1      | 0.722        | -1.167       | <u>0.002</u> | <u>-3.336</u> | <u>0.002</u> | <u>-3.891</u> |
| COL23A1     | <b>0.016</b> | <b>2.043</b> | 0.598        | -1.290        | 0.388        | 1.584         |
| COL9A2      | <b>0.028</b> | <b>2.360</b> | 0.111        | -3.307        | 0.628        | -1.401        |
| COMMD3      | 0.291        | 1.423        | <b>0.004</b> | <b>-3.516</b> | <b>0.029</b> | <b>-2.471</b> |
| COMMD3-BMI1 | 0.101        | 1.515        | <u>0.020</u> | <u>-2.683</u> | 0.123        | -1.772        |
| COMT        | <u>0.044</u> | <u>1.836</u> | 0.361        | -2.145        | 0.849        | -1.168        |
| COPS2       | 0.294        | -1.192       | 0.101        | -1.360        | <b>0.012</b> | <b>-1.621</b> |
| COQ2        | 0.100        | 1.366        | 0.363        | 1.245         | <b>0.035</b> | <b>1.700</b>  |
| COQ9        | <b>0.048</b> | <b>2.016</b> | 0.418        | -1.370        | 0.304        | 1.472         |
| CORO1C      | 0.128        | 1.230        | 0.121        | 1.286         | <b>0.009</b> | <b>1.582</b>  |
| COX17       | 0.572        | -1.113       | <b>0.045</b> | <b>-1.611</b> | <b>0.022</b> | <b>-1.794</b> |
| COX4I1      | 0.940        | 1.014        | <u>0.001</u> | <u>-2.121</u> | <u>0.001</u> | <u>-2.091</u> |
| COX5B       | 0.172        | 1.254        | <u>0.005</u> | <u>-1.782</u> | 0.069        | -1.421        |

|            |                     |                      |                     |                      |                     |                      |
|------------|---------------------|----------------------|---------------------|----------------------|---------------------|----------------------|
| COX7A2L    | <b><u>0.008</u></b> | <b><u>1.936</u></b>  | <b><u>0.015</u></b> | <b><u>-2.112</u></b> | 0.699               | -1.091               |
| CRAT       | <b><u>0.006</u></b> | <b><u>2.335</u></b>  | <b><u>0.000</u></b> | <b><u>-4.868</u></b> | <b><u>0.026</u></b> | <b><u>-2.085</u></b> |
| CREG1      | <b><u>0.032</u></b> | -1.477               | 0.269               | -1.281               | <b><u>0.013</u></b> | <b><u>-1.891</u></b> |
| CRELD2     | 0.822               | 1.057                | <b><u>0.038</u></b> | <b><u>2.175</u></b>  | <b><u>0.030</u></b> | <b><u>2.300</u></b>  |
| CREM       | 0.166               | -1.522               | 0.439               | -1.230               | <b><u>0.019</u></b> | <b><u>-1.872</u></b> |
| CRISP3     | <b><u>0.007</u></b> | <b><u>2.111</u></b>  | 0.551               | -1.471               | 0.585               | 1.436                |
| CRLF3      | 0.201               | 1.285                | 0.257               | 1.197                | <b><u>0.022</u></b> | <b><u>1.539</u></b>  |
| CRY2       | 0.987               | -1.005               | <b><u>0.002</u></b> | <b><u>-2.109</u></b> | <b><u>0.000</u></b> | <b><u>-2.119</u></b> |
| CRYL1      | 0.663               | 1.145                | <b><u>0.002</u></b> | <b><u>-3.418</u></b> | <b><u>0.003</u></b> | <b><u>-2.984</u></b> |
| CSGALNACT1 | <b><u>0.005</u></b> | <b><u>1.656</u></b>  | 0.161               | -1.337               | 0.319               | 1.238                |
| CSGALNACT2 | 0.466               | -1.089               | <b><u>0.045</u></b> | -1.439               | <b><u>0.020</u></b> | <b><u>-1.567</u></b> |
| CTDSPL     | <b><u>0.031</u></b> | <b><u>2.186</u></b>  | <b><u>0.001</u></b> | <b><u>-4.730</u></b> | 0.064               | -2.164               |
| CTGLF12P   | <b><u>0.023</u></b> | <b><u>1.760</u></b>  | 0.340               | -1.401               | 0.493               | 1.256                |
| CTSA       | 0.163               | 1.270                | 0.230               | 1.303                | <b><u>0.030</u></b> | <b><u>1.654</u></b>  |
| CUL7       | <b><u>0.017</u></b> | <b><u>1.851</u></b>  | 0.958               | -1.021               | 0.137               | 1.813                |
| CXCL1      | 0.068               | 1.441                | 0.194               | 1.398                | <b><u>0.020</u></b> | <b><u>2.015</u></b>  |
| CXCR1      | 0.289               | 1.345                | 0.080               | 1.821                | <b><u>0.019</u></b> | <b><u>2.449</u></b>  |
| CXCR3      | <b><u>0.043</u></b> | <b><u>-2.203</u></b> | 0.910               | -1.101               | 0.309               | -2.426               |
| CXCR4      | 0.055               | -1.416               | <b><u>0.028</u></b> | <b><u>-1.842</u></b> | <b><u>0.003</u></b> | <b><u>-2.608</u></b> |
| CXorf40B   | 0.214               | 1.311                | <b><u>0.013</u></b> | <b><u>-2.236</u></b> | 0.050               | -1.705               |
| CYB561D2   | 0.665               | 1.151                | <b><u>0.023</u></b> | <b><u>-1.898</u></b> | 0.065               | -1.649               |
| DAOA-AS1   | 0.526               | 1.132                | <b><u>0.017</u></b> | <b><u>2.099</u></b>  | <b><u>0.009</u></b> | <b><u>2.377</u></b>  |
| DAPP1      | 0.482               | -1.161               | <b><u>0.004</u></b> | <b><u>1.976</u></b>  | <b><u>0.013</u></b> | <b><u>1.701</u></b>  |
| DCAF7      | 0.146               | 1.348                | 0.389               | 1.166                | <b><u>0.041</u></b> | <b><u>1.572</u></b>  |
| DCHS2      | 0.812               | 1.073                | <b><u>0.031</u></b> | <b><u>3.704</u></b>  | <b><u>0.025</u></b> | <b><u>3.976</u></b>  |
| DCTN6      | 0.149               | -1.283               | 0.065               | -1.441               | <b><u>0.004</u></b> | <b><u>-1.850</u></b> |
| DDIT4      | 0.969               | -1.010               | <b><u>0.020</u></b> | <b><u>-1.683</u></b> | <b><u>0.014</u></b> | <b><u>-1.699</u></b> |
| DDT        | <b><u>0.024</u></b> | <b><u>1.629</u></b>  | 0.180               | -1.500               | 0.732               | 1.087                |
| DDTL       | <b><u>0.030</u></b> | <b><u>1.647</u></b>  | 0.759               | -1.086               | 0.073               | 1.517                |
| DDX24      | 0.726               | -1.078               | <b><u>0.030</u></b> | <b><u>-1.747</u></b> | <b><u>0.010</u></b> | <b><u>-1.882</u></b> |
| DDX25      | 0.485               | -1.137               | <b><u>0.008</u></b> | <b><u>2.041</u></b>  | <b><u>0.026</u></b> | <b><u>1.795</u></b>  |
| DDX27      | 0.975               | -1.007               | <b><u>0.001</u></b> | <b><u>-1.904</u></b> | <b><u>0.001</u></b> | <b><u>-1.917</u></b> |
| DDX28      | 0.088               | 1.621                | <b><u>0.009</u></b> | <b><u>-2.721</u></b> | 0.079               | -1.679               |
| DEFA4      | <b><u>0.033</u></b> | <b><u>2.514</u></b>  | 0.878               | -1.226               | 0.595               | 2.050                |
| DENND2C    | 0.680               | -1.080               | <b><u>0.035</u></b> | <b><u>-1.548</u></b> | <b><u>0.023</u></b> | <b><u>-1.671</u></b> |
| DERA       | <b><u>0.039</u></b> | <b><u>1.729</u></b>  | 0.737               | -1.099               | 0.131               | 1.573                |
| DGAT2      | 0.189               | 1.321                | 0.155               | 1.338                | <b><u>0.028</u></b> | <b><u>1.768</u></b>  |
| DGCR11     | 0.124               | 1.357                | 0.100               | 1.717                | <b><u>0.019</u></b> | <b><u>2.330</u></b>  |
| DGKE       | 0.899               | 1.018                | <b><u>0.012</u></b> | 1.492                | <b><u>0.006</u></b> | <b><u>1.518</u></b>  |

|            |                     |                      |                     |                      |                     |                      |
|------------|---------------------|----------------------|---------------------|----------------------|---------------------|----------------------|
| DHRS12     | 0.197               | 1.330                | 0.076               | 1.885                | <b>0.020</b>        | <b>2.507</b>         |
| DHRS7      | <b>0.029</b>        | <b>1.550</b>         | 0.355               | -1.159               | 0.094               | 1.337                |
| DHX40      | 0.454               | -1.131               | 0.087               | -1.339               | <b>0.028</b>        | <b>-1.515</b>        |
| DIO2-AS1   | 0.219               | -1.326               | 0.197               | -1.353               | <b>0.043</b>        | <b>-1.795</b>        |
| DIP2A-IT1  | 0.237               | 1.398                | <b>0.023</b>        | <b>-2.486</b>        | 0.130               | -1.778               |
| DISC1      | 0.896               | 1.024                | 0.053               | 1.480                | <b>0.036</b>        | <b>1.516</b>         |
| DKK3       | 0.706               | -1.094               | <b>0.004</b>        | <b>-2.003</b>        | <b>0.004</b>        | <b>-2.191</b>        |
| DLG5       | 0.229               | -1.449               | 0.152               | -2.131               | <b>0.048</b>        | <b>-3.088</b>        |
| DLGAP1-AS1 | 0.477               | 1.133                | <b>0.012</b>        | <b>-1.724</b>        | <b>0.031</b>        | <b>-1.521</b>        |
| DLST       | 0.850               | -1.027               | 0.062               | -1.506               | <u><b>0.045</b></u> | <u><b>-1.546</b></u> |
| DNAAF1     | <b>0.029</b>        | <b>-2.080</b>        | 0.142               | -3.105               | <b>0.032</b>        | <b>-6.460</b>        |
| DNAJA3     | <u><b>0.002</b></u> | <u><b>2.609</b></u>  | 0.473               | -1.630               | 0.475               | 1.601                |
| DNAJB2     | 0.990               | -1.003               | <b>0.048</b>        | <b>-1.642</b>        | <b>0.022</b>        | <b>-1.647</b>        |
| DNAJB4     | 0.637               | 1.167                | <b>0.049</b>        | <b>-2.188</b>        | 0.114               | -1.875               |
| DNAJB7     | 0.125               | 1.297                | <b>0.008</b>        | <b>-1.601</b>        | 0.108               | -1.234               |
| DNAJB9     | 0.462               | -1.210               | 0.114               | -1.548               | <b>0.033</b>        | <b>-1.873</b>        |
| DNAJC11    | <b>0.014</b>        | <b>2.574</b>         | 0.498               | -1.578               | 0.464               | 1.631                |
| DNAJC2     | 0.127               | -1.233               | 0.208               | -1.319               | <b>0.044</b>        | <b>-1.626</b>        |
| DNASE1L1   | <b>0.003</b>        | <b>1.687</b>         | 0.473               | 1.321                | 0.066               | 2.228                |
| DND1       | 0.064               | 1.545                | 0.492               | 1.200                | <b>0.011</b>        | <b>1.854</b>         |
| DNMBP      | 0.604               | -1.172               | <b>0.017</b>        | <b>-2.545</b>        | <b>0.007</b>        | <b>-2.981</b>        |
| DPPA5      | <b>0.030</b>        | <b>1.641</b>         | 0.217               | -1.601               | 0.949               | 1.025                |
| DPRXP4     | 0.377               | 1.300                | 0.193               | 1.598                | <b>0.033</b>        | <b>2.078</b>         |
| DPYD       | 0.427               | 1.133                | <b>0.046</b>        | 1.347                | <u><b>0.011</b></u> | <u><b>1.527</b></u>  |
| DSTN       | 0.102               | 1.255                | <b>0.030</b>        | <b>-1.523</b>        | 0.254               | -1.214               |
| DTWD1      | 0.079               | 1.719                | <b>0.005</b>        | <b>-3.177</b>        | 0.105               | -1.848               |
| DUS2       | <b>0.015</b>        | <b>1.987</b>         | 0.282               | -1.484               | 0.332               | 1.339                |
| DUSP2      | 0.612               | -1.279               | 0.126               | -2.001               | <b>0.033</b>        | <b>-2.559</b>        |
| DUSP23     | <b>0.003</b>        | <b>2.620</b>         | 0.088               | -1.849               | 0.288               | 1.417                |
| DUSP3      | 0.540               | -1.100               | <b>0.009</b>        | <b>2.220</b>         | <b>0.017</b>        | <b>2.018</b>         |
| DUSP4      | <u><b>0.021</b></u> | <u><b>-3.439</b></u> | 0.703               | 1.376                | 0.294               | -2.500               |
| DUSP6      | 0.150               | 1.264                | <b>0.030</b>        | <b>1.668</b>         | <b>0.004</b>        | <b>2.109</b>         |
| DUT        | 0.151               | 1.436                | <u><b>0.003</b></u> | <u><b>-2.323</b></u> | 0.067               | -1.618               |
| E2F3       | 0.112               | 1.266                | 0.127               | 1.322                | <b>0.010</b>        | <b>1.673</b>         |
| EDEM3      | 0.117               | 1.206                | 0.138               | 1.282                | <b>0.017</b>        | <b>1.546</b>         |
| EDN1       | 0.329               | -1.378               | <u><b>0.015</b></u> | <u><b>-2.628</b></u> | <u><b>0.002</b></u> | <u><b>-3.620</b></u> |
| EFCAB10    | 0.821               | 1.053                | <b>0.004</b>        | <b>-2.259</b>        | <b>0.007</b>        | <b>-2.145</b>        |
| EFCAB12    | <b>0.018</b>        | <b>1.636</b>         | 0.515               | -1.221               | 0.290               | 1.340                |
| EFEMP2     | <b>0.004</b>        | <b>2.351</b>         | <b>0.004</b>        | <b>-2.266</b>        | 0.875               | 1.038                |

|              |                     |                     |                     |                      |                     |                      |
|--------------|---------------------|---------------------|---------------------|----------------------|---------------------|----------------------|
| EFNB2        | 0.696               | 1.166               | <b>0.035</b>        | <b>-3.974</b>        | 0.056               | -3.407               |
| EGFL8        | <b>0.041</b>        | <b>1.548</b>        | 0.244               | 1.668                | <b>0.049</b>        | <b>2.582</b>         |
| EIF1B-AS1    | <b>0.017</b>        | <b>2.104</b>        | 0.966               | -1.017               | 0.099               | 2.069                |
| EIF2AK3      | 0.461               | -1.346              | <u><b>0.006</b></u> | <u><b>-2.803</b></u> | <u><b>0.001</b></u> | <u><b>-3.773</b></u> |
| EIF4E3       | 0.698               | 1.059               | <b>0.023</b>        | 1.449                | <b>0.013</b>        | <b>1.534</b>         |
| ELAC1        | 0.126               | -1.227              | <b>0.001</b>        | <b>-1.659</b>        | <b>0.000</b>        | <b>-2.035</b>        |
| ELL2         | 0.070               | -1.609              | 0.051               | -2.124               | <b>0.005</b>        | <b>-3.417</b>        |
| ELL3         | 0.864               | 1.049               | <b>0.006</b>        | <b>-2.213</b>        | <b>0.010</b>        | <b>-2.111</b>        |
| ELMO2        | 0.402               | -1.175              | <b>0.036</b>        | <b>-1.623</b>        | <b>0.010</b>        | <b>-1.906</b>        |
| ELP2         | 0.651               | -1.143              | <b>0.016</b>        | <b>-1.988</b>        | <b>0.002</b>        | <b>-2.272</b>        |
| EMC2         | 0.257               | 1.303               | 0.410               | 1.189                | <b>0.005</b>        | <b>1.550</b>         |
| EMC8         | 0.072               | 1.446               | <b>0.016</b>        | <b>-2.240</b>        | 0.134               | -1.549               |
| EML6         | 0.213               | 1.153               | <b>0.027</b>        | 1.391                | <b>0.004</b>        | <b>1.604</b>         |
| EMR2         | 0.480               | 1.129               | <b>0.042</b>        | <b>1.569</b>         | <b>0.015</b>        | <b>1.772</b>         |
| ENG          | <u><b>0.019</b></u> | <u><b>2.346</b></u> | 0.538               | -1.624               | 0.644               | 1.444                |
| ENKD1        | <b>0.019</b>        | <b>2.128</b>        | 0.643               | -1.318               | 0.403               | 1.615                |
| ENPP4        | 0.338               | 1.443               | <b>0.001</b>        | <b>-4.979</b>        | <b>0.005</b>        | <b>-3.449</b>        |
| EPB41L4A-AS1 | 0.322               | -1.527              | 0.180               | -2.070               | <b>0.042</b>        | <b>-3.160</b>        |
| EPB41L5      | 0.088               | -1.440              | <b>0.028</b>        | <b>2.751</b>         | 0.114               | 1.910                |
| EPHA1        | 0.176               | 1.245               | 0.163               | 1.426                | <u><b>0.042</b></u> | <u><b>1.776</b></u>  |
| EPHB4        | <u><b>0.027</b></u> | <u><b>2.022</b></u> | 0.866               | -1.106               | 0.308               | 1.829                |
| EPHX1        | <b>0.013</b>        | <b>2.309</b>        | 0.116               | -2.050               | 0.773               | 1.126                |
| EPHX3        | <b>0.018</b>        | <b>2.265</b>        | 0.536               | 1.253                | <b>0.016</b>        | <b>2.838</b>         |
| EPPK1        | <b>0.038</b>        | <b>1.957</b>        | 0.353               | -1.666               | 0.767               | 1.175                |
| ERAP2        | 0.585               | -1.142              | <b>0.021</b>        | <b>1.774</b>         | <b>0.038</b>        | <b>1.553</b>         |
| EREG         | <b>0.020</b>        | -1.186              | 0.104               | -1.292               | <b>0.017</b>        | <b>-1.532</b>        |
| ERI1         | 0.970               | 1.009               | <b>0.029</b>        | <b>2.013</b>         | <b>0.033</b>        | <b>2.030</b>         |
| ESRP2        | 0.145               | 1.466               | <b>0.024</b>        | <b>2.417</b>         | <b>0.003</b>        | <b>3.543</b>         |
| ETNK1        | 0.099               | 1.381               | 0.157               | 1.292                | <u><b>0.008</b></u> | <u><b>1.784</b></u>  |
| EVI2A        | 0.751               | 1.057               | <b>0.025</b>        | <b>1.604</b>         | <b>0.019</b>        | <b>1.695</b>         |
| EXOC5        | 0.171               | 1.232               | 0.209               | 1.302                | <b>0.041</b>        | <b>1.604</b>         |
| EYS          | 0.556               | 1.134               | <b>0.039</b>        | 1.465                | <b>0.017</b>        | <b>1.662</b>         |
| EZH2         | 0.859               | -1.066              | 0.064               | -2.184               | <b>0.035</b>        | <b>-2.327</b>        |
| F12          | 0.741               | -1.102              | <b>0.022</b>        | <b>-1.811</b>        | <b>0.024</b>        | <b>-1.997</b>        |
| F2RL1        | 0.228               | 1.271               | <b>0.015</b>        | <b>1.702</b>         | <b>0.002</b>        | <b>2.163</b>         |
| F5           | 0.906               | 1.020               | 0.061               | 1.596                | <b>0.047</b>        | <b>1.628</b>         |
| FABP3        | 0.307               | -1.395              | 0.163               | -1.996               | <b>0.043</b>        | <b>-2.784</b>        |
| FADD         | 0.071               | 1.499               | 0.820               | 1.056                | <b>0.027</b>        | <b>1.583</b>         |
| FADS3        | 0.411               | 1.292               | <b>0.000</b>        | <b>-3.037</b>        | <b>0.004</b>        | <b>-2.350</b>        |

|          |              |               |              |               |              |               |
|----------|--------------|---------------|--------------|---------------|--------------|---------------|
| FAM160A2 | 0.480        | -1.098        | 0.067        | -1.609        | <b>0.038</b> | <b>-1.767</b> |
| FAM162A  | 0.216        | 1.423         | <b>0.015</b> | <b>-2.780</b> | 0.080        | -1.953        |
| FAM174B  | <b>0.004</b> | <b>2.325</b>  | 0.668        | 1.230         | 0.055        | 2.859         |
| FAM179A  | 0.114        | -1.813        | 0.264        | -1.467        | <b>0.015</b> | <b>-2.659</b> |
| FAM184B  | 0.475        | -1.085        | <b>0.005</b> | <b>-1.552</b> | <b>0.001</b> | <b>-1.684</b> |
| FAM185A  | 0.554        | 1.124         | 0.058        | 1.494         | <b>0.016</b> | <b>1.679</b>  |
| FAM198B  | <b>0.021</b> | <b>2.784</b>  | 0.468        | 1.569         | <b>0.042</b> | <b>4.368</b>  |
| FAM19A2  | <b>0.048</b> | <b>1.740</b>  | 0.446        | -1.433        | 0.678        | 1.215         |
| FAM200A  | <b>0.006</b> | <b>2.326</b>  | 0.512        | -1.233        | <b>0.044</b> | <b>1.887</b>  |
| FAM209A  | 0.240        | -1.320        | 0.252        | -1.320        | <b>0.022</b> | <b>-1.742</b> |
| FAM3A    | 0.585        | 1.180         | <b>0.033</b> | <b>-1.966</b> | 0.102        | -1.666        |
| FAM53B   | 0.165        | 1.270         | <b>0.002</b> | <b>-1.682</b> | <b>0.020</b> | -1.324        |
| FAM92B   | 0.212        | 1.168         | <b>0.027</b> | 1.486         | <b>0.005</b> | <b>1.736</b>  |
| FANCB    | <b>0.027</b> | <b>1.710</b>  | 0.484        | -1.243        | 0.258        | 1.376         |
| FANK1    | 0.429        | 1.078         | <b>0.024</b> | 1.464         | <b>0.011</b> | <b>1.578</b>  |
| FAS-AS1  | 0.948        | -1.016        | <b>0.032</b> | <b>-1.781</b> | <b>0.012</b> | <b>-1.809</b> |
| FBXL14   | 0.069        | 1.781         | 0.418        | 1.425         | <b>0.036</b> | <b>2.539</b>  |
| FBXL5    | 0.612        | 1.086         | <b>0.005</b> | <b>1.517</b>  | <b>0.005</b> | <b>1.648</b>  |
| FBXO22   | 0.596        | -1.108        | <b>0.010</b> | <b>-1.705</b> | <b>0.008</b> | <b>-1.889</b> |
| FBXO30   | 0.682        | 1.088         | <b>0.016</b> | 1.439         | <b>0.037</b> | <b>1.565</b>  |
| FBXO31   | 0.417        | -1.421        | <b>0.009</b> | <b>-3.895</b> | <b>0.002</b> | <b>-5.535</b> |
| FBXO38   | 0.671        | 1.064         | <b>0.030</b> | 1.415         | <b>0.023</b> | <b>1.506</b>  |
| FCGR1A   | 0.856        | 1.066         | <b>0.003</b> | <b>3.559</b>  | <b>0.002</b> | <b>3.795</b>  |
| FCGR1B   | 0.949        | 1.019         | <b>0.000</b> | <b>3.933</b>  | <b>0.000</b> | <b>4.008</b>  |
| FCGR1C   | 0.918        | 1.048         | <b>0.002</b> | <b>5.517</b>  | <b>0.001</b> | <b>5.782</b>  |
| FCRLB    | <b>0.042</b> | <b>-1.619</b> | <b>0.025</b> | <b>1.890</b>  | 0.496        | 1.167         |
| FEM1B    | 0.057        | 1.222         | <b>0.030</b> | <b>-1.612</b> | 0.164        | -1.319        |
| FICD     | <b>0.029</b> | <b>2.192</b>  | <b>0.012</b> | <b>-2.535</b> | 0.645        | -1.157        |
| FILIP1L  | 0.533        | -1.362        | <b>0.010</b> | <b>-3.246</b> | <b>0.001</b> | <b>-4.422</b> |
| FLJ10038 | 0.253        | -1.191        | <b>0.007</b> | <b>-2.166</b> | <b>0.002</b> | <b>-2.580</b> |
| FLJ14186 | 0.157        | 1.259         | <b>0.047</b> | <b>-1.761</b> | 0.203        | -1.398        |
| FLJ23867 | 0.299        | -1.406        | 0.231        | -1.373        | <b>0.026</b> | <b>-1.931</b> |
| FLJ42393 | 0.108        | 1.341         | 0.096        | 2.782         | <b>0.045</b> | <b>3.731</b>  |
| FMNL2    | 0.723        | -1.107        | <b>0.039</b> | <b>1.768</b>  | 0.125        | 1.597         |
| FNBP4    | 0.803        | 1.037         | <b>0.043</b> | <b>-1.563</b> | 0.055        | -1.507        |
| FOXC1    | 0.117        | -1.943        | <b>0.003</b> | <b>-3.472</b> | <b>0.000</b> | <b>-6.746</b> |
| FPGT     | 0.705        | 1.112         | <u>0.009</u> | <u>2.468</u>  | <b>0.008</b> | <b>2.744</b>  |
| FUND2    | 0.859        | 1.051         | <b>0.004</b> | <b>-2.342</b> | <b>0.003</b> | <b>-2.228</b> |
| FUT11    | 0.550        | 1.163         | <b>0.017</b> | <b>-1.876</b> | 0.092        | -1.612        |

|         |              |               |              |               |              |                |
|---------|--------------|---------------|--------------|---------------|--------------|----------------|
| FUT7    | 0.179        | 1.396         | 0.118        | 2.395         | <b>0.043</b> | <b>3.345</b>   |
| FXR2    | <b>0.028</b> | <b>1.700</b>  | 0.391        | 1.281         | <b>0.009</b> | <b>2.177</b>   |
| FYTTD1  | 0.154        | -1.341        | 0.393        | -1.228        | <b>0.029</b> | <b>-1.647</b>  |
| GAB3    | 0.100        | 1.409         | 0.359        | 1.155         | <b>0.018</b> | <b>1.628</b>   |
| GADD45A | 0.123        | -1.313        | <u>0.011</u> | <u>-1.587</u> | <u>0.000</u> | <u>-2.085</u>  |
| GADD45B | 0.128        | -1.719        | 0.108        | -1.431        | <b>0.008</b> | <b>-2.461</b>  |
| GALK2   | 0.118        | 1.329         | 0.123        | 1.378         | <u>0.008</u> | <u>1.831</u>   |
| GALT    | <u>0.018</u> | <u>2.061</u>  | <u>0.041</u> | <u>-2.201</u> | 0.840        | -1.068         |
| GATSL3  | <b>0.035</b> | <b>2.073</b>  | 0.190        | -2.101        | 0.981        | -1.013         |
| GBP1    | 0.485        | -1.285        | <b>0.004</b> | <b>3.132</b>  | <b>0.016</b> | <b>2.436</b>   |
| GBP1P1  | 0.414        | -1.536        | <b>0.024</b> | <b>2.549</b>  | 0.237        | 1.659          |
| GBP2    | 0.504        | -1.159        | <b>0.002</b> | <b>1.938</b>  | <b>0.015</b> | <b>1.673</b>   |
| GBP3    | 0.231        | -1.486        | <b>0.007</b> | <b>2.278</b>  | 0.124        | 1.534          |
| GBP4    | 0.413        | -1.197        | <b>0.011</b> | <b>1.836</b>  | <b>0.014</b> | <b>1.534</b>   |
| GBP5    | 0.477        | -1.319        | <b>0.003</b> | <b>3.228</b>  | <b>0.014</b> | <b>2.447</b>   |
| GEM     | <b>0.040</b> | <b>-1.607</b> | <b>0.028</b> | <b>1.682</b>  | 0.779        | 1.047          |
| GFOD1   | 0.893        | -1.035        | <b>0.042</b> | <b>-3.349</b> | <b>0.038</b> | <b>-3.466</b>  |
| GGTA1P  | <b>0.009</b> | <b>2.741</b>  | 0.510        | -1.953        | 0.737        | 1.404          |
| GHRLOS  | 0.931        | -1.010        | <b>0.000</b> | <b>-1.668</b> | <b>0.000</b> | <b>-1.685</b>  |
| GIF     | 0.290        | 1.406         | 0.154        | 2.120         | <b>0.048</b> | <b>2.981</b>   |
| GIMAP4  | 0.980        | 1.009         | 0.053        | 2.753         | <b>0.048</b> | <b>2.777</b>   |
| GIMAP8  | 0.141        | 1.953         | 0.142        | 2.475         | <b>0.020</b> | <b>4.833</b>   |
| GINS3   | <b>0.017</b> | <b>1.681</b>  | 0.574        | -1.198        | 0.282        | 1.404          |
| GJB2    | 0.537        | 1.296         | <b>0.033</b> | <b>-2.199</b> | 0.196        | -1.697         |
| GJB7    | 0.595        | 1.137         | 0.054        | 1.650         | <b>0.017</b> | <b>1.875</b>   |
| GLRX3   | 0.983        | 1.004         | <b>0.000</b> | <b>-2.190</b> | <b>0.001</b> | <b>-2.181</b>  |
| GMNN    | 0.071        | 1.659         | 0.252        | 1.539         | <b>0.014</b> | <b>2.553</b>   |
| GNG10   | 0.515        | -1.138        | <b>0.018</b> | <b>1.803</b>  | 0.055        | 1.584          |
| GNRH1   | 0.198        | 1.365         | 0.428        | 1.201         | <b>0.025</b> | <b>1.639</b>   |
| GOLGA8T | <b>0.047</b> | <b>1.567</b>  | 0.092        | -1.858        | 0.612        | -1.186         |
| GPN3    | 0.061        | 1.753         | 0.581        | 1.182         | <b>0.027</b> | <b>2.072</b>   |
| GPR155  | 0.617        | 1.071         | <b>0.021</b> | 1.420         | <b>0.005</b> | <b>1.520</b>   |
| GPR19   | <b>0.006</b> | <b>2.942</b>  | 0.836        | 1.105         | <b>0.037</b> | <b>3.250</b>   |
| GPR85   | 0.927        | -1.018        | <b>0.043</b> | <b>1.649</b>  | 0.058        | 1.620          |
| GPR98   | 0.335        | 1.163         | <b>0.040</b> | <b>1.503</b>  | <b>0.013</b> | <b>1.747</b>   |
| GPT2    | 0.202        | 1.435         | <u>0.004</u> | <u>-2.594</u> | <u>0.027</u> | <u>-1.807</u>  |
| GRAMD1C | <b>0.023</b> | <b>2.295</b>  | 0.968        | 1.014         | <b>0.028</b> | <b>2.327</b>   |
| GRAMD4  | <b>0.049</b> | <b>1.974</b>  | 0.710        | -1.241        | 0.438        | 1.590          |
| GRASP   | 0.135        | -2.001        | <b>0.000</b> | <b>-7.821</b> | <b>0.000</b> | <b>-15.650</b> |

|           |                     |                     |                     |                      |                     |                      |
|-----------|---------------------|---------------------|---------------------|----------------------|---------------------|----------------------|
| GRB10     | <b><u>0.004</u></b> | <b><u>2.029</u></b> | 0.339               | -1.573               | 0.576               | 1.290                |
| GRIP1     | 0.540               | -1.239              | <b>0.038</b>        | <b>3.269</b>         | 0.085               | 2.638                |
| GRIP2     | 0.095               | 1.314               | <b>0.048</b>        | <b>1.673</b>         | <b>0.006</b>        | <b>2.199</b>         |
| GRPEL2    | <b>0.011</b>        | <b>2.110</b>        | <b>0.016</b>        | <b>-2.229</b>        | 0.842               | -1.057               |
| GSTT1     | 0.906               | 1.020               | <b><u>0.030</u></b> | <b><u>-1.775</u></b> | <b><u>0.031</u></b> | <b><u>-1.741</u></b> |
| GTF2E2    | 0.089               | 1.355               | 0.519               | 1.162                | <b>0.048</b>        | <b>1.573</b>         |
| GTF2I     | 0.707               | -1.064              | <b>0.023</b>        | -1.458               | <b>0.030</b>        | <b>-1.552</b>        |
| GTF3C2    | <b>0.002</b>        | <b>1.549</b>        | 0.199               | -1.287               | 0.321               | 1.203                |
| GTF3C4    | 0.603               | -1.116              | 0.095               | -1.550               | <b>0.021</b>        | <b>-1.729</b>        |
| GTPBP4    | 0.548               | 1.229               | <b>0.000</b>        | <b>-3.472</b>        | <b>0.000</b>        | <b>-2.825</b>        |
| GUSB      | 0.937               | 1.020               | <b><u>0.003</u></b> | <b><u>-2.090</u></b> | <b><u>0.005</u></b> | <b><u>-2.050</u></b> |
| GVINP1    | 0.951               | 1.012               | 0.052               | 1.490                | <b>0.015</b>        | <b>1.508</b>         |
| GYG2P1    | <b>0.002</b>        | <b>-1.723</b>       | 0.556               | -1.120               | <b>0.008</b>        | <b>-1.930</b>        |
| GYS1      | <b><u>0.022</u></b> | <b><u>1.626</u></b> | 0.904               | 1.063                | 0.291               | 1.727                |
| HAAO      | <b><u>0.004</u></b> | <b><u>2.817</u></b> | 0.515               | -1.418               | 0.232               | 1.986                |
| HACL1     | 0.912               | -1.023              | <b><u>0.010</u></b> | <b><u>-1.804</u></b> | <b><u>0.009</u></b> | <b><u>-1.846</u></b> |
| HADH      | <b><u>0.048</u></b> | <b><u>2.039</u></b> | 0.830               | -1.171               | 0.468               | 1.740                |
| HCAR2     | 0.949               | -1.013              | <b>0.041</b>        | <b>1.509</b>         | 0.060               | 1.489                |
| HCAR3     | 0.611               | -1.132              | <b>0.022</b>        | <b>1.636</b>         | 0.137               | 1.445                |
| HCK       | 0.125               | 1.406               | 0.516               | 1.137                | <b><u>0.041</u></b> | <b><u>1.599</u></b>  |
| HCRTR1    | <b>0.027</b>        | <b>1.643</b>        | 0.526               | 1.351                | 0.115               | 2.219                |
| HEATR1    | 0.058               | 1.860               | <b>0.006</b>        | <b>-2.414</b>        | 0.212               | -1.298               |
| HEXA      | <b><u>0.046</u></b> | <b><u>1.643</u></b> | 0.488               | -1.474               | 0.836               | 1.115                |
| HEXA-AS1  | 0.661               | 1.060               | 0.063               | 1.448                | <b>0.041</b>        | <b>1.535</b>         |
| HIST1H1C  | <b>0.003</b>        | <b>1.668</b>        | 0.097               | -1.612               | 0.884               | 1.035                |
| HIST1H2AL | <b>0.034</b>        | <b>2.127</b>        | 0.719               | -1.365               | 0.600               | 1.558                |
| HIST1H2BJ | 0.638               | -1.128              | <b>0.029</b>        | <b>1.665</b>         | 0.189               | 1.476                |
| HIST2H2BF | 0.685               | 1.139               | <b>0.037</b>        | <b>1.879</b>         | <b>0.001</b>        | <b>2.141</b>         |
| HLA-DQA1  | 0.672               | 1.127               | <b>0.042</b>        | <b>1.819</b>         | <b>0.009</b>        | <b>2.049</b>         |
| HLX       | 0.832               | 1.037               | <b>0.030</b>        | <b>1.647</b>         | <b>0.023</b>        | <b>1.708</b>         |
| HMG20A    | <b>0.003</b>        | <b>1.950</b>        | 0.618               | -1.161               | 0.096               | 1.679                |
| HMGCR     | 0.782               | 1.033               | <b>0.032</b>        | 1.494                | <b><u>0.028</u></b> | <b><u>1.543</u></b>  |
| HMGCS1    | 0.846               | -1.043              | <b><u>0.015</u></b> | <b><u>-1.587</u></b> | <b><u>0.004</u></b> | <b><u>-1.656</u></b> |
| HN1       | 0.082               | 1.264               | 0.227               | 1.313                | <b>0.044</b>        | <b>1.659</b>         |
| HPRT1     | <b><u>0.026</u></b> | <b><u>1.817</u></b> | 0.688               | -1.225               | 0.431               | 1.483                |
| HPS4      | 0.133               | -1.175              | <b>0.000</b>        | -1.458               | <b>0.000</b>        | <b>-1.713</b>        |
| HPSE      | 0.979               | 1.004               | <b><u>0.012</u></b> | <b><u>1.647</u></b>  | <b><u>0.015</u></b> | <b><u>1.653</u></b>  |
| HRH2      | <b>0.041</b>        | <b>1.783</b>        | 0.643               | 1.181                | 0.051               | 2.105                |
| HSBP1L1   | 0.967               | -1.012              | <b>0.045</b>        | <b>-2.972</b>        | <b>0.041</b>        | <b>-3.007</b>        |

|          |                     |                     |              |               |              |               |
|----------|---------------------|---------------------|--------------|---------------|--------------|---------------|
| HSD17B10 | <b><u>0.013</u></b> | <b><u>2.391</u></b> | <b>0.040</b> | <b>-3.191</b> | 0.567        | -1.335        |
| HSDL1    | 0.595               | -1.098              | 0.063        | -2.341        | <b>0.044</b> | <b>-2.570</b> |
| HSPA13   | 0.479               | -1.222              | 0.129        | -1.493        | <b>0.007</b> | <b>-1.824</b> |
| HSPA9    | 0.887               | -1.041              | 0.065        | -1.612        | <b>0.018</b> | <b>-1.679</b> |
| HYAL2    | <b><u>0.026</u></b> | <b><u>1.616</u></b> | 0.596        | 1.256         | 0.123        | 2.029         |
| HYI      | <b>0.002</b>        | <b>2.021</b>        | 0.394        | -1.313        | 0.159        | 1.539         |
| HYKK     | 0.480               | -1.103              | <b>0.037</b> | <b>1.926</b>  | 0.064        | 1.746         |
| ICOSLG   | 0.313               | -1.636              | <b>0.046</b> | <b>-2.576</b> | <b>0.007</b> | <b>-4.214</b> |
| IER5     | 0.701               | -1.136              | <b>0.005</b> | <b>-2.257</b> | <b>0.003</b> | <b>-2.563</b> |
| IFI16    | 0.516               | -1.148              | <b>0.043</b> | <b>1.781</b>  | 0.107        | 1.551         |
| IFI27L2  | <b>0.043</b>        | <b>-1.742</b>       | 0.580        | 1.238         | 0.382        | -1.407        |
| IFI44    | <b>0.020</b>        | <b>-2.283</b>       | 0.714        | 1.240         | 0.299        | -1.842        |
| IFI6     | <b>0.033</b>        | <b>-2.131</b>       | 0.994        | 1.004         | 0.179        | -2.123        |
| IFIH1    | <b>0.046</b>        | <b>-1.607</b>       | 0.470        | 1.209         | 0.227        | -1.329        |
| IFIT1B   | 0.597               | -1.161              | <b>0.005</b> | <b>5.854</b>  | <b>0.008</b> | <b>5.044</b>  |
| IFIT5    | <b>0.048</b>        | <b>-1.663</b>       | 0.572        | 1.295         | 0.570        | -1.285        |
| IFNAR2   | 0.381               | 1.132               | <b>0.009</b> | 1.472         | <b>0.002</b> | <b>1.665</b>  |
| IFNK     | 0.859               | 1.064               | <b>0.032</b> | <b>-2.847</b> | 0.053        | -2.675        |
| IFT122   | <b>0.021</b>        | <b>1.704</b>        | <b>0.042</b> | <b>-1.736</b> | 0.917        | -1.018        |
| IGSF8    | <b>0.026</b>        | <b>2.295</b>        | 0.294        | -1.554        | 0.352        | 1.477         |
| IL10RA   | 0.178               | -1.298              | <b>0.042</b> | <b>-1.628</b> | <b>0.004</b> | <b>-2.113</b> |
| IL21R    | <b>0.036</b>        | -1.364              | 0.230        | -1.281        | <b>0.011</b> | <b>-1.748</b> |
| IL4I1    | 0.054               | -1.248              | 0.228        | -1.225        | <b>0.025</b> | <b>-1.528</b> |
| ILF2     | 0.658               | 1.125               | <b>0.049</b> | <b>-1.831</b> | 0.068        | -1.628        |
| ILF3     | 0.550               | -1.168              | <b>0.038</b> | <b>-1.828</b> | <b>0.006</b> | <b>-2.134</b> |
| ILKAP    | 0.672               | 1.083               | <b>0.000</b> | <b>-2.066</b> | <b>0.000</b> | <b>-1.908</b> |
| IMP3     | 0.058               | -2.142              | 0.267        | -1.471        | <b>0.011</b> | <b>-3.150</b> |
| INHBC    | <b>0.039</b>        | <b>2.644</b>        | 0.838        | 1.148         | 0.138        | 3.035         |
| INO80B   | 0.061               | 1.346               | <b>0.000</b> | <b>-1.858</b> | <b>0.022</b> | -1.380        |
| INSR     | <b>0.028</b>        | <b>1.579</b>        | 0.286        | -1.331        | 0.527        | 1.186         |
| IP6K2    | 0.383               | -1.129              | <b>0.005</b> | -1.356        | <b>0.002</b> | <b>-1.531</b> |
| IPO11    | 0.309               | 1.399               | <b>0.031</b> | <b>-2.083</b> | 0.210        | -1.489        |
| IPO8     | 0.285               | 1.214               | 0.146        | 1.330         | <b>0.031</b> | <b>1.615</b>  |
| IRAK1BP1 | 0.080               | 1.283               | <b>0.042</b> | <b>1.580</b>  | <b>0.005</b> | <b>2.027</b>  |
| IRAK2    | 0.067               | -1.383              | <b>0.045</b> | -1.453        | <b>0.001</b> | <b>-2.010</b> |
| IRF2BP1  | <b>0.042</b>        | <b>1.983</b>        | 0.715        | -1.091        | 0.066        | 1.818         |
| IRF2BP2  | 0.378               | -1.265              | 0.167        | -1.475        | <b>0.033</b> | <b>-1.866</b> |
| IRF5     | 0.119               | -1.426              | <b>0.028</b> | <b>-1.927</b> | <b>0.002</b> | <b>-2.748</b> |
| IRS2     | 0.208               | -1.325              | 0.103        | -1.768        | <b>0.026</b> | <b>-2.342</b> |



|              |              |              |              |               |              |               |
|--------------|--------------|--------------|--------------|---------------|--------------|---------------|
| ISCA1        | 0.164        | -1.418       | 0.127        | -1.431        | <b>0.008</b> | <b>-2.029</b> |
| ITFG1        | <b>0.003</b> | <b>1.545</b> | 0.815        | -1.038        | <b>0.014</b> | 1.488         |
| ITGA6        | 0.217        | 1.263        | 0.334        | 1.216         | <b>0.048</b> | <b>1.536</b>  |
| ITGB1        | 0.264        | 1.230        | 0.052        | 1.359         | <b>0.006</b> | <b>1.672</b>  |
| ITGB1BP1     | 0.204        | 1.429        | <b>0.020</b> | <b>-1.749</b> | 0.406        | -1.224        |
| ITPA         | <b>0.022</b> | <b>2.099</b> | 0.383        | -1.560        | 0.580        | 1.346         |
| IWS1         | 0.069        | 1.312        | 0.171        | 1.205         | <b>0.007</b> | <b>1.582</b>  |
| JAG1         | 0.789        | 1.061        | <b>0.006</b> | <b>-1.766</b> | <b>0.012</b> | <b>-1.664</b> |
| JAKMIP3      | <b>0.044</b> | <b>2.037</b> | 0.735        | 1.123         | <b>0.017</b> | <b>2.287</b>  |
| JMY          | 0.549        | -1.265       | <b>0.020</b> | <b>-2.770</b> | <b>0.004</b> | <b>-3.503</b> |
| JOSD1        | 0.804        | -1.052       | <b>0.015</b> | <b>-1.664</b> | <b>0.010</b> | <b>-1.750</b> |
| KANSL2       | 0.834        | -1.041       | <b>0.003</b> | <b>-1.909</b> | <b>0.001</b> | <b>-1.988</b> |
| KAT5         | <b>0.007</b> | 1.335        | 0.297        | 1.273         | <b>0.043</b> | <b>1.698</b>  |
| KBTBD11      | <b>0.005</b> | <b>2.443</b> | 0.056        | -2.607        | 0.871        | -1.067        |
| KBTBD4       | 0.068        | 1.603        | <b>0.036</b> | <b>-1.932</b> | 0.428        | -1.205        |
| KCNE1        | <b>0.039</b> | <b>1.971</b> | 0.680        | 1.415         | 0.235        | 2.788         |
| KCNH3        | <b>0.030</b> | <b>2.016</b> | 0.186        | -2.268        | 0.829        | -1.125        |
| KCNJ1        | <b>0.013</b> | <b>2.506</b> | 0.702        | -1.140        | <b>0.002</b> | <b>2.198</b>  |
| KCNJ15       | 0.922        | 1.022        | <b>0.015</b> | <b>2.265</b>  | <b>0.012</b> | <b>2.315</b>  |
| KCNK17       | <b>0.039</b> | <b>2.026</b> | 0.454        | -1.559        | 0.666        | 1.300         |
| KCNQ1        | 0.161        | 1.347        | <b>0.019</b> | <b>-1.718</b> | 0.311        | -1.275        |
| KCNRG        | 0.448        | 1.321        | 0.081        | 1.676         | <b>0.023</b> | <b>2.214</b>  |
| KCTD10       | 0.707        | -1.070       | <b>0.012</b> | <b>-1.661</b> | <b>0.005</b> | <b>-1.777</b> |
| KCTD15       | <b>0.015</b> | <b>2.687</b> | 0.576        | -1.329        | 0.182        | 2.021         |
| KCTD2        | <b>0.011</b> | 1.444        | <b>0.018</b> | <b>-1.502</b> | 0.796        | -1.040        |
| KCTD4        | 0.586        | 1.085        | <b>0.001</b> | <b>-1.690</b> | <b>0.009</b> | <b>-1.557</b> |
| KCTD5        | 0.413        | 1.214        | <b>0.033</b> | <b>-1.689</b> | 0.173        | -1.391        |
| KCTD6        | <b>0.031</b> | <b>2.014</b> | 0.758        | -1.189        | 0.342        | 1.694         |
| KDELRL1      | <b>0.010</b> | <b>1.621</b> | 0.118        | -1.672        | 0.918        | -1.032        |
| KIAA0040     | 0.524        | 1.151        | 0.067        | 1.533         | <b>0.019</b> | <b>1.764</b>  |
| KIAA1407     | <b>0.005</b> | <b>1.746</b> | 0.085        | -1.377        | 0.136        | 1.268         |
| KIAA1737     | 0.312        | 1.107        | <b>0.001</b> | <b>-1.549</b> | <b>0.007</b> | -1.399        |
| KIAA1984-AS1 | <b>0.044</b> | <b>2.081</b> | 0.180        | -1.576        | 0.409        | 1.320         |
| KIF24        | 0.077        | 1.335        | 0.188        | 1.390         | <b>0.023</b> | <b>1.856</b>  |
| KLF10        | 0.678        | -1.211       | 0.053        | -2.176        | <b>0.020</b> | <b>-2.635</b> |
| KLF2         | 0.229        | 1.264        | 0.170        | 1.423         | <b>0.043</b> | <b>1.799</b>  |
| KLF5         | 0.507        | -1.150       | 0.086        | -1.418        | <b>0.020</b> | <b>-1.630</b> |
| KLF9         | 0.948        | -1.021       | <b>0.000</b> | <b>-3.642</b> | <b>0.000</b> | <b>-3.717</b> |
| KLHDC10      | <b>0.001</b> | <b>1.506</b> | 0.591        | -1.074        | <b>0.017</b> | 1.403         |

|              |              |               |              |               |              |               |
|--------------|--------------|---------------|--------------|---------------|--------------|---------------|
| KLHDC2       | 0.925        | 1.013         | <b>0.021</b> | <b>-1.504</b> | <b>0.032</b> | -1.485        |
| KLHL11       | 0.503        | 1.143         | <b>0.042</b> | <b>-1.775</b> | 0.078        | -1.553        |
| KLHL21       | 0.849        | 1.025         | <b>0.001</b> | <b>-1.515</b> | <b>0.006</b> | -1.479        |
| KLHL22       | <b>0.007</b> | <b>2.138</b>  | 0.066        | -2.076        | 0.929        | 1.030         |
| KLRAP1       | 0.847        | 1.032         | <b>0.049</b> | <b>-1.517</b> | 0.058        | -1.470        |
| KPNB1        | 0.588        | 1.112         | 0.061        | 1.366         | <b>0.015</b> | <b>1.519</b>  |
| KRI1         | 0.387        | 1.151         | <b>0.041</b> | <b>-1.721</b> | 0.095        | -1.494        |
| KRT23        | 0.133        | 1.652         | <b>0.021</b> | <b>-1.957</b> | 0.445        | -1.185        |
| KRT8         | 0.889        | -1.019        | <b>0.047</b> | <b>-1.508</b> | <b>0.046</b> | <b>-1.537</b> |
| KRT8P12      | 0.586        | -1.088        | 0.060        | -1.514        | <b>0.036</b> | <b>-1.647</b> |
| KY           | 0.225        | 1.238         | 0.191        | 1.326         | <b>0.036</b> | <b>1.641</b>  |
| LACTB        | 0.146        | -1.453        | 0.291        | -1.246        | <b>0.010</b> | <b>-1.810</b> |
| LAMP3        | <b>0.031</b> | <b>-1.701</b> | 0.067        | 1.581         | 0.583        | -1.076        |
| LEMD2        | 0.197        | 1.323         | <b>0.019</b> | <b>-1.671</b> | <b>0.021</b> | -1.263        |
| LGALS12      | <b>0.048</b> | <b>2.099</b>  | 0.402        | -1.685        | 0.717        | 1.246         |
| LGALS8       | 0.255        | -1.253        | <b>0.000</b> | <b>2.069</b>  | <b>0.002</b> | <b>1.651</b>  |
| LILRA1       | <b>0.031</b> | <b>1.576</b>  | 0.724        | -1.101        | 0.189        | 1.431         |
| LILRA5       | 0.550        | -1.109        | <b>0.039</b> | <b>1.600</b>  | 0.108        | 1.443         |
| LINC00152    | 0.403        | 1.133         | 0.087        | 1.453         | <b>0.031</b> | <b>1.646</b>  |
| LINC00202-1  | <b>0.040</b> | <b>1.504</b>  | 0.520        | -1.153        | 0.263        | 1.305         |
| LINC00266-1  | 0.683        | 1.093         | 0.069        | 1.810         | <b>0.048</b> | <b>1.979</b>  |
| LINC00282    | 0.428        | 1.199         | <b>0.019</b> | <b>3.041</b>  | <b>0.010</b> | <b>3.646</b>  |
| LINC00324    | <b>0.032</b> | <b>1.640</b>  | 0.651        | 1.306         | 0.211        | 2.143         |
| LINC00537    | 0.311        | 1.263         | 0.079        | 1.578         | <b>0.006</b> | <b>1.993</b>  |
| LINC00582    | <b>0.041</b> | <b>1.907</b>  | 0.752        | 1.122         | 0.090        | 2.140         |
| LINC00593    | <b>0.036</b> | <b>1.960</b>  | 0.194        | 2.047         | <b>0.025</b> | <b>4.011</b>  |
| LINC00629    | 0.698        | -1.047        | <b>0.030</b> | <b>1.527</b>  | <b>0.048</b> | 1.458         |
| LINC00649    | 0.423        | 1.100         | 0.103        | 1.388         | <b>0.046</b> | <b>1.527</b>  |
| LINC00654    | <b>0.010</b> | <b>2.177</b>  | 0.896        | -1.051        | 0.058        | 2.072         |
| LINC00667    | 0.986        | -1.003        | <b>0.008</b> | <b>-2.193</b> | <b>0.008</b> | <b>-2.199</b> |
| LINC00854    | <b>0.018</b> | <b>2.269</b>  | 0.832        | 1.140         | 0.138        | 2.587         |
| LINC00948    | 0.472        | -1.186        | 0.084        | -1.694        | <b>0.036</b> | <b>-2.009</b> |
| LINC00960    | 0.144        | 1.352         | 0.600        | 1.122         | <b>0.048</b> | <b>1.517</b>  |
| LINC00987    | <b>0.010</b> | <b>2.393</b>  | 0.307        | -1.474        | 0.196        | 1.623         |
| LINS         | 0.272        | 1.332         | 0.410        | 1.275         | <b>0.037</b> | <b>1.698</b>  |
| LLPH         | 0.229        | -2.168        | <b>0.036</b> | <b>-2.624</b> | <b>0.002</b> | <b>-5.690</b> |
| LOC100127888 | <b>0.004</b> | <b>-2.214</b> | 0.615        | -1.461        | 0.147        | -3.233        |
| LOC100127974 | 0.817        | -1.059        | <b>0.022</b> | <b>-1.548</b> | <b>0.027</b> | <b>-1.640</b> |
| LOC100129518 | 0.284        | -1.457        | <b>0.017</b> | <b>-2.547</b> | <b>0.003</b> | <b>-3.711</b> |

|              |              |               |              |               |              |               |
|--------------|--------------|---------------|--------------|---------------|--------------|---------------|
| LOC100129726 | 0.296        | -1.360        | <b>0.002</b> | <b>-2.651</b> | <b>0.000</b> | <b>-3.605</b> |
| LOC100130093 | <b>0.016</b> | <b>1.502</b>  | 0.501        | 1.036         | <b>0.009</b> | <b>1.556</b>  |
| LOC100130476 | 0.254        | -1.548        | <b>0.001</b> | <b>-3.560</b> | <b>0.000</b> | <b>-5.510</b> |
| LOC100133445 | 0.400        | 1.346         | <b>0.043</b> | <b>-2.386</b> | 0.180        | -1.773        |
| LOC100133985 | <b>0.007</b> | <b>2.144</b>  | 0.191        | 1.997         | <b>0.019</b> | <b>4.282</b>  |
| LOC100287036 | 0.953        | -1.013        | <b>0.004</b> | <b>-1.781</b> | <b>0.002</b> | <b>-1.804</b> |
| LOC100287177 | 0.801        | 1.063         | <b>0.027</b> | <b>-1.542</b> | 0.081        | -1.450        |
| LOC100288846 | <b>0.032</b> | <b>1.702</b>  | 0.203        | -1.485        | 0.603        | 1.146         |
| LOC100288897 | 0.965        | -1.009        | <b>0.031</b> | <b>1.792</b>  | <b>0.035</b> | <b>1.776</b>  |
| LOC100289473 | <b>0.037</b> | <b>1.572</b>  | 0.170        | -1.362        | 0.479        | 1.155         |
| LOC100294362 | 0.277        | -1.208        | <b>0.013</b> | <b>1.986</b>  | <b>0.046</b> | <b>1.644</b>  |
| LOC100505549 | 0.193        | 1.290         | 0.289        | 1.262         | <b>0.038</b> | <b>1.627</b>  |
| LOC100505702 | 0.702        | 1.084         | 0.071        | 1.775         | <b>0.047</b> | <b>1.924</b>  |
| LOC100506207 | 0.296        | -1.340        | 0.195        | -1.428        | <b>0.042</b> | <b>-1.914</b> |
| LOC100506241 | 0.394        | 1.259         | 0.095        | 1.630         | <b>0.010</b> | <b>2.052</b>  |
| LOC100506639 | 0.243        | 1.236         | <b>0.022</b> | <b>-1.758</b> | 0.100        | -1.422        |
| LOC100506655 | 0.884        | -1.053        | <b>0.024</b> | <b>-2.087</b> | <b>0.035</b> | <b>-2.197</b> |
| LOC100527964 | <b>0.037</b> | <b>2.197</b>  | 0.580        | 1.457         | 0.104        | 3.202         |
| LOC101927045 | 0.215        | 1.163         | <b>0.038</b> | 1.391         | <b>0.005</b> | <b>1.617</b>  |
| LOC101927069 | 0.085        | 1.582         | <b>0.043</b> | <b>-1.989</b> | 0.437        | -1.257        |
| LOC101927272 | 0.542        | 1.171         | <b>0.050</b> | <b>2.491</b>  | <b>0.023</b> | <b>2.918</b>  |
| LOC101927865 | <b>0.010</b> | <b>2.518</b>  | <b>0.047</b> | <b>-2.424</b> | 0.929        | 1.039         |
| LOC101927902 | 0.150        | -1.293        | 0.053        | -1.531        | <b>0.005</b> | <b>-1.980</b> |
| LOC101927939 | <b>0.009</b> | <b>1.542</b>  | 0.952        | 1.014         | 0.085        | 1.563         |
| LOC101928047 | <b>0.048</b> | <b>1.872</b>  | 0.661        | -1.357        | 0.638        | 1.380         |
| LOC101928133 | 0.544        | -1.135        | <b>0.003</b> | <b>-1.744</b> | <b>0.000</b> | <b>-1.979</b> |
| LOC101928324 | <b>0.040</b> | <b>1.783</b>  | 0.138        | -1.773        | 0.987        | 1.006         |
| LOC101928403 | 0.976        | -1.011        | <b>0.043</b> | <b>-1.796</b> | 0.057        | -1.816        |
| LOC101928476 | <b>0.032</b> | <b>-1.733</b> | 0.960        | 1.017         | 0.181        | -1.705        |
| LOC101928527 | 0.123        | 1.292         | 0.146        | 1.577         | <b>0.035</b> | <b>2.038</b>  |
| LOC101928537 | 0.318        | -1.191        | <b>0.049</b> | <b>1.756</b>  | 0.126        | 1.474         |
| LOC101928668 | <b>0.049</b> | <b>1.856</b>  | 0.763        | 1.198         | 0.211        | 2.224         |
| LOC101929736 | <b>0.033</b> | <b>1.605</b>  | 0.112        | -1.826        | 0.726        | -1.138        |
| LOC150381    | <b>0.039</b> | <b>1.882</b>  | 0.834        | 1.123         | 0.191        | 2.115         |
| LOC150776    | 0.698        | 1.087         | <b>0.037</b> | <b>-1.969</b> | 0.054        | -1.812        |
| LOC257358    | 0.334        | 1.309         | <b>0.006</b> | <b>-2.593</b> | <b>0.041</b> | <b>-1.981</b> |
| LOC283922    | 0.391        | 1.146         | <b>0.016</b> | <b>-1.752</b> | 0.051        | -1.529        |
| LOC285389    | 0.439        | -1.220        | <b>0.028</b> | <b>1.582</b>  | 0.252        | 1.297         |
| LOC285889    | <b>0.029</b> | <b>1.818</b>  | 0.826        | -1.046        | 0.067        | 1.737         |

|           |              |               |              |               |              |               |
|-----------|--------------|---------------|--------------|---------------|--------------|---------------|
| LOC286367 | 0.253        | 1.236         | 0.137        | 1.531         | <b>0.041</b> | <b>1.891</b>  |
| LOC441009 | 0.207        | 1.359         | 0.100        | 2.448         | <b>0.038</b> | <b>3.327</b>  |
| LOC441124 | 0.583        | 1.130         | <b>0.042</b> | <b>-1.988</b> | 0.084        | -1.759        |
| LOC442075 | 0.310        | -1.130        | <b>0.002</b> | -1.441        | <b>0.000</b> | <b>-1.628</b> |
| LOC494141 | 0.092        | -1.343        | <b>0.002</b> | <b>-1.759</b> | <b>0.000</b> | <b>-2.362</b> |
| LOC541473 | <b>0.050</b> | <b>1.512</b>  | 0.093        | -1.759        | 0.611        | -1.163        |
| LOC641776 | <b>0.029</b> | <b>1.593</b>  | 0.154        | 1.665         | <b>0.018</b> | <b>2.653</b>  |
| LOC642846 | 0.510        | 1.356         | <b>0.034</b> | <b>-4.855</b> | 0.079        | -3.579        |
| LOC643733 | 0.607        | -1.121        | <b>0.014</b> | <b>2.282</b>  | <b>0.033</b> | <b>2.035</b>  |
| LOC644090 | 0.750        | -1.063        | <b>0.032</b> | <b>-1.804</b> | <b>0.021</b> | <b>-1.918</b> |
| LOC653712 | 0.966        | -1.008        | <b>0.032</b> | <b>2.046</b>  | <b>0.034</b> | <b>2.031</b>  |
| LOC727896 | 0.820        | -1.040        | <b>0.033</b> | <b>1.516</b>  | <b>0.032</b> | 1.458         |
| LOC728323 | 0.368        | 1.204         | <b>0.031</b> | <b>1.541</b>  | <b>0.008</b> | <b>1.855</b>  |
| LOC728431 | <b>0.029</b> | <b>-2.097</b> | 0.745        | 1.148         | 0.164        | -1.827        |
| LOC729739 | 0.070        | 1.236         | 0.080        | 1.406         | <b>0.012</b> | <b>1.739</b>  |
| LOC730668 | 0.421        | 1.144         | 0.074        | 1.387         | <b>0.019</b> | <b>1.586</b>  |
| LOXL4     | 0.205        | 1.275         | 0.227        | 1.315         | <b>0.028</b> | <b>1.677</b>  |
| LPAR6     | 0.339        | 1.234         | 0.118        | 1.529         | <b>0.028</b> | <b>1.887</b>  |
| LPCAT4    | <b>0.009</b> | <b>2.325</b>  | 0.617        | -1.426        | 0.474        | 1.631         |
| LRP5L     | 0.067        | -1.533        | <b>0.014</b> | <b>-1.555</b> | <b>0.000</b> | <b>-2.384</b> |
| LRRC17    | 0.437        | -1.185        | <b>0.040</b> | <b>3.665</b>  | 0.063        | 3.093         |
| LRRC34    | <b>0.012</b> | <b>1.621</b>  | 0.758        | -1.176        | 0.545        | 1.378         |
| LRRC41    | 0.394        | 1.304         | <b>0.001</b> | <b>-3.027</b> | <b>0.001</b> | <b>-2.322</b> |
| LSG1      | 0.260        | -1.217        | 0.139        | -1.264        | <b>0.013</b> | <b>-1.538</b> |
| LTB4R2    | <b>0.023</b> | <b>1.842</b>  | 0.059        | 1.726         | <b>0.001</b> | <b>3.178</b>  |
| LTBR      | <b>0.030</b> | <b>1.619</b>  | 0.078        | 1.768         | <b>0.004</b> | <b>2.863</b>  |
| LUCAT1    | 0.514        | 1.131         | <b>0.001</b> | <b>1.704</b>  | <b>0.001</b> | <b>1.928</b>  |
| LY6E      | <b>0.023</b> | <b>-2.928</b> | 0.732        | 1.437         | 0.511        | -2.038        |
| LYG1      | <b>0.037</b> | <b>2.250</b>  | 0.590        | -1.312        | 0.316        | 1.715         |
| LYPD4     | <b>0.011</b> | <b>1.833</b>  | 0.123        | 3.081         | <b>0.034</b> | <b>5.645</b>  |
| MACF1     | 0.219        | 1.215         | 0.167        | 1.310         | <b>0.023</b> | <b>1.592</b>  |
| MAD2L1BP  | 0.202        | -1.318        | 0.112        | -1.545        | <b>0.019</b> | <b>-2.037</b> |
| MAGIX     | 0.168        | 1.422         | 0.369        | 1.319         | <b>0.033</b> | <b>1.876</b>  |
| MAGOH2    | <b>0.024</b> | <b>1.880</b>  | 0.585        | -1.285        | 0.426        | 1.462         |
| MAK16     | 0.296        | 1.235         | <b>0.002</b> | <b>-2.130</b> | <b>0.011</b> | <b>-1.725</b> |
| MAP2K6    | 0.774        | -1.061        | <b>0.046</b> | <b>2.009</b>  | 0.055        | 1.893         |
| MAP3K1    | 0.398        | 1.097         | <b>0.000</b> | <b>1.536</b>  | <b>0.000</b> | <b>1.686</b>  |
| MAP3K8    | 0.090        | -1.530        | 0.158        | -1.546        | <b>0.016</b> | <b>-2.364</b> |
| MAPK14    | 0.664        | 1.086         | 0.069        | 1.594         | <b>0.046</b> | <b>1.732</b>  |

|             |              |                     |              |               |              |                      |
|-------------|--------------|---------------------|--------------|---------------|--------------|----------------------|
| MAPK6       | 0.230        | -1.317              | 0.154        | -1.289        | <b>0.008</b> | <b><u>-1.698</u></b> |
| MAT2B       | 0.187        | 1.231               | 0.143        | 1.254         | <b>0.007</b> | <b><u>1.544</u></b>  |
| MBOAT4      | 0.645        | 1.169               | <b>0.020</b> | <b>-2.276</b> | 0.070        | -1.947               |
| MBP         | 0.264        | 1.264               | 0.242        | 1.242         | <b>0.047</b> | <b>1.569</b>         |
| MBTPS1      | 0.680        | -1.058              | <b>0.002</b> | <b>-1.696</b> | <b>0.000</b> | <b>-1.795</b>        |
| MCM2        | 0.296        | 1.513               | <b>0.049</b> | <b>-3.225</b> | 0.187        | -2.131               |
| MCM3AP      | <b>0.048</b> | <b>1.661</b>        | 0.233        | -1.371        | 0.198        | 1.212                |
| MCM3AP-AS1  | 0.266        | 1.439               | <b>0.015</b> | <b>-2.145</b> | 0.190        | -1.490               |
| MCM4        | 0.290        | 1.151               | <b>0.042</b> | <b>-1.716</b> | 0.112        | -1.491               |
| MCM7        | 0.080        | 1.748               | <b>0.039</b> | <b>-2.115</b> | 0.421        | -1.210               |
| MCTP2       | 0.226        | 1.215               | 0.128        | 1.285         | <b>0.016</b> | <b>1.562</b>         |
| MCU         | <b>0.002</b> | <b>1.607</b>        | 0.316        | -1.260        | 0.271        | 1.275                |
| MEA1        | <b>0.015</b> | <b>1.516</b>        | 0.563        | -1.113        | 0.067        | 1.362                |
| MED16       | 0.206        | 1.311               | 0.359        | 1.183         | <b>0.020</b> | <b><u>1.551</u></b>  |
| MED22       | <b>0.014</b> | <b>1.637</b>        | 0.575        | -1.152        | 0.113        | 1.421                |
| MED26       | 0.793        | -1.055              | <b>0.037</b> | -1.446        | <b>0.008</b> | <b>-1.525</b>        |
| MED28       | 0.590        | 1.065               | <b>0.006</b> | <b>-1.527</b> | <b>0.012</b> | -1.434               |
| MED30       | 0.300        | -1.153              | <b>0.013</b> | <b>-1.505</b> | <b>0.002</b> | <b><u>-1.736</u></b> |
| MED4-AS1    | 0.395        | -1.155              | 0.061        | -1.371        | <b>0.020</b> | <b>-1.584</b>        |
| MEF2D       | 0.968        | -1.008              | <b>0.003</b> | <b>-1.603</b> | <b>0.007</b> | <b><u>-1.616</u></b> |
| MEI1        | 0.414        | -1.167              | 0.074        | -1.287        | <b>0.023</b> | <b>-1.502</b>        |
| MERTK       | <b>0.006</b> | <b><u>2.173</u></b> | 0.648        | 1.274         | 0.088        | 2.768                |
| METRNL      | 0.270        | -1.282              | 0.126        | -1.381        | <b>0.035</b> | <b>-1.770</b>        |
| MGC12916    | 0.426        | -1.345              | 0.119        | -1.534        | <b>0.033</b> | <b>-2.063</b>        |
| MIA-RAB4B   | <b>0.008</b> | <b>2.537</b>        | 0.775        | 1.214         | 0.110        | 3.080                |
| MICB        | 0.602        | 1.128               | 0.189        | 1.379         | <b>0.038</b> | <b>1.555</b>         |
| MIER3       | 0.808        | -1.051              | <b>0.021</b> | <b>-1.515</b> | <b>0.021</b> | <b>-1.592</b>        |
| MIF4GD      | <b>0.036</b> | <b>1.985</b>        | 0.388        | -1.756        | 0.847        | 1.130                |
| MIR181A2HG  | 0.159        | 1.337               | 0.141        | 1.665         | <b>0.033</b> | <b>2.226</b>         |
| MIR3198-1   | 0.597        | -1.144              | 0.089        | -1.375        | <b>0.036</b> | <b>-1.573</b>        |
| MIR4435-1HG | 0.102        | 1.344               | 0.184        | 1.397         | <b>0.027</b> | <b>1.877</b>         |
| MIR4742     | <b>0.032</b> | <b>1.689</b>        | 0.392        | 1.410         | 0.058        | 2.382                |
| MIS18BP1    | 0.766        | 1.045               | <b>0.006</b> | <b>-1.594</b> | <b>0.018</b> | <b>-1.525</b>        |
| MKKS        | <b>0.030</b> | <b><u>2.034</u></b> | 0.603        | 1.343         | 0.091        | 2.732                |
| MLEC        | <b>0.033</b> | <b>1.507</b>        | 0.410        | -1.339        | 0.739        | 1.126                |
| MLLT11      | 0.064        | 1.541               | <b>0.000</b> | <b>-2.746</b> | <b>0.002</b> | <b>-1.781</b>        |
| MMP14       | <b>0.045</b> | <b><u>2.341</u></b> | 0.067        | 2.420         | <b>0.002</b> | <b>5.665</b>         |
| MNDA        | 0.333        | 1.307               | 0.170        | 1.555         | <b>0.034</b> | <b>2.032</b>         |
| MOGS        | 0.149        | 1.329               | <b>0.000</b> | <b>-2.291</b> | <b>0.008</b> | <b>-1.724</b>        |

|            |                     |                     |                     |                      |                     |                      |
|------------|---------------------|---------------------|---------------------|----------------------|---------------------|----------------------|
| MOSPD2     | 0.195               | 1.481               | 0.119               | 1.504                | <b>0.006</b>        | <b>2.227</b>         |
| MOV10      | <b>0.030</b>        | <b>-1.727</b>       | 0.427               | 1.235                | 0.158               | -1.399               |
| MPP1       | 0.990               | 1.002               | <b>0.042</b>        | <b>1.524</b>         | <b>0.044</b>        | <b>1.527</b>         |
| MRGBP      | 0.969               | 1.010               | <b>0.040</b>        | <b>-1.812</b>        | 0.062               | -1.795               |
| MRPL18     | 0.848               | -1.058              | 0.079               | -1.548               | <b>0.028</b>        | <b>-1.637</b>        |
| MRPL4      | 0.440               | 1.201               | <b>0.015</b>        | <b>-2.200</b>        | <b>0.038</b>        | <b>-1.832</b>        |
| MRPL51     | <b>0.049</b>        | <b>1.759</b>        | 0.769               | 1.138                | 0.115               | 2.001                |
| MRPL55     | <b>0.013</b>        | <b>2.037</b>        | <b>0.001</b>        | <b>-2.912</b>        | 0.147               | -1.430               |
| MRS2       | <b>0.045</b>        | <b>2.195</b>        | 0.123               | -2.247               | 0.963               | -1.023               |
| MRVI1-AS1  | 0.065               | 1.789               | 0.213               | 1.431                | <b>0.001</b>        | <b>2.560</b>         |
| MSMP       | 0.116               | 1.498               | <b>0.001</b>        | <b>-2.332</b>        | 0.063               | -1.557               |
| MSRB1      | 0.471               | 1.215               | 0.076               | 1.797                | <b>0.030</b>        | <b>2.184</b>         |
| MT2A       | <b>0.017</b>        | <b>-2.767</b>       | 0.179               | -2.454               | <b>0.014</b>        | <b>-6.789</b>        |
| MTERFD2    | 0.264               | 1.245               | <b>0.010</b>        | <b>-1.696</b>        | <b>0.012</b>        | -1.362               |
| MTRNR2L5   | 0.288               | 1.820               | 0.114               | 1.866                | <b>0.018</b>        | <b>3.396</b>         |
| MTRNR2L7   | 0.959               | -1.013              | <b>0.015</b>        | <b>2.168</b>         | <b>0.018</b>        | <b>2.141</b>         |
| MUL1       | 0.334               | 1.227               | <b>0.048</b>        | <b>-1.729</b>        | 0.177               | -1.409               |
| MVD        | 0.817               | -1.098              | <u><b>0.001</b></u> | <u><b>-3.170</b></u> | <u><b>0.002</b></u> | <u><b>-3.480</b></u> |
| MXD3       | 0.248               | 1.134               | <b>0.037</b>        | 1.335                | <b>0.008</b>        | <b>1.514</b>         |
| MXD4       | 0.615               | 1.110               | <b>0.011</b>        | <b>-1.936</b>        | <b>0.025</b>        | <b>-1.744</b>        |
| MXI1       | 0.947               | -1.014              | <b>0.011</b>        | <b>-1.707</b>        | <b>0.008</b>        | <b>-1.730</b>        |
| MYBPH      | <b>0.038</b>        | <b>2.460</b>        | 0.096               | -2.096               | 0.685               | 1.173                |
| MYCBP2-AS1 | <b>0.026</b>        | <b>1.556</b>        | 0.369               | -1.258               | 0.356               | 1.237                |
| MYEF2      | 0.764               | -1.047              | <b>0.013</b>        | -1.460               | <b>0.015</b>        | <b>-1.528</b>        |
| MYEOV2     | <b>0.044</b>        | <b>1.916</b>        | <b>0.036</b>        | <b>-1.783</b>        | 0.776               | 1.075                |
| MYL12B     | <b>0.042</b>        | 1.262               | 0.120               | 1.263                | <b>0.007</b>        | <b>1.594</b>         |
| MYL7       | <b>0.028</b>        | <b>1.528</b>        | 0.779               | -1.046               | 0.105               | 1.461                |
| MYO16-AS1  | 0.371               | 1.372               | <b>0.032</b>        | <b>-2.494</b>        | 0.156               | -1.818               |
| MYO7B      | <b>0.023</b>        | <b>2.102</b>        | 0.913               | -1.056               | 0.147               | 1.991                |
| MZF1       | <b>0.019</b>        | <b>1.861</b>        | 0.549               | 1.384                | 0.106               | 2.576                |
| MZT1       | 0.581               | 1.178               | <b>0.011</b>        | <b>-2.117</b>        | <b>0.040</b>        | <b>-1.797</b>        |
| N4BP3      | 0.462               | -1.434              | 0.079               | -2.776               | <b>0.030</b>        | <b>-3.982</b>        |
| NAA10      | <u><b>0.006</b></u> | <u><b>1.520</b></u> | 0.191               | 1.406                | <b>0.013</b>        | <b>2.138</b>         |
| NABP1      | 0.698               | -1.063              | <b>0.017</b>        | <b>1.596</b>         | 0.051               | 1.502                |
| NAGLU      | <u><b>0.035</b></u> | <u><b>1.802</b></u> | 0.740               | -1.213               | 0.503               | 1.486                |
| NAT9       | <b>0.003</b>        | <b>1.700</b>        | 0.909               | -1.031               | 0.080               | 1.648                |
| NBPF14     | <b>0.023</b>        | <b>1.698</b>        | 0.696               | -1.177               | 0.404               | 1.443                |
| NBPF3      | 0.125               | 1.230               | <b>0.019</b>        | <b>-1.795</b>        | 0.093               | -1.459               |
| NBPF9      | 0.907               | -1.069              | <b>0.026</b>        | <b>-3.376</b>        | <b>0.037</b>        | <b>-3.609</b>        |

|            |              |              |              |               |              |               |
|------------|--------------|--------------|--------------|---------------|--------------|---------------|
| NCBP2      | 0.346        | -1.168       | 0.069        | -1.510        | <b>0.017</b> | <b>-1.764</b> |
| NCBP2-AS2  | 0.273        | 1.267        | <b>0.017</b> | <b>-2.857</b> | <b>0.049</b> | <b>-2.254</b> |
| NDC80      | 0.953        | 1.012        | <b>0.041</b> | <b>-1.685</b> | <b>0.032</b> | <b>-1.664</b> |
| NDUFA5     | 0.863        | 1.021        | <b>0.034</b> | <b>-1.542</b> | <b>0.042</b> | <b>-1.511</b> |
| NDUFAF1    | 0.376        | 1.204        | 0.126        | 1.532         | <b>0.046</b> | <b>1.845</b>  |
| NDUFB7     | <b>0.020</b> | <b>1.910</b> | 0.854        | -1.130        | 0.436        | 1.690         |
| NDUFS6     | 0.223        | 1.378        | <b>0.008</b> | <b>-2.547</b> | <b>0.043</b> | <b>-1.848</b> |
| NDUFV2     | 0.445        | -1.187       | <b>0.026</b> | <b>-1.596</b> | <b>0.005</b> | <b>-1.895</b> |
| NEDD8-MDP1 | <b>0.001</b> | <b>2.015</b> | 0.206        | -1.455        | 0.230        | 1.385         |
| NEIL1      | 0.750        | -1.113       | 0.183        | -1.660        | <b>0.047</b> | <b>-1.848</b> |
| NELFA      | 0.155        | 1.467        | <b>0.010</b> | <b>-1.997</b> | 0.138        | -1.362        |
| NET1       | 0.528        | -1.277       | <b>0.022</b> | <b>-2.324</b> | <b>0.006</b> | <b>-2.968</b> |
| NFE2       | 0.176        | 1.512        | 0.162        | 1.496         | <b>0.009</b> | <b>2.263</b>  |
| NFKB2      | 0.399        | -1.222       | 0.057        | -1.490        | <b>0.022</b> | <b>-1.821</b> |
| NFKBIA     | 0.239        | -1.579       | <b>0.002</b> | <b>-2.158</b> | <b>0.001</b> | <b>-3.406</b> |
| NFKBIE     | 0.342        | -1.473       | <b>0.032</b> | <b>-2.008</b> | <b>0.006</b> | <b>-2.958</b> |
| NFU1       | 0.134        | 1.419        | <b>0.029</b> | <b>-1.981</b> | 0.187        | -1.396        |
| NFXL1      | 0.086        | -1.471       | <b>0.017</b> | <b>1.906</b>  | 0.297        | 1.296         |
| NHLH1      | <b>0.049</b> | <b>1.743</b> | 0.913        | 1.037         | <b>0.036</b> | <b>1.807</b>  |
| NHP2       | 0.190        | -1.542       | <b>0.008</b> | <b>-2.996</b> | <b>0.001</b> | <b>-4.620</b> |
| NIF3L1     | <b>0.028</b> | <b>1.614</b> | 0.484        | 1.343         | 0.085        | 2.166         |
| NISCH      | 0.099        | 1.422        | <b>0.030</b> | <b>-1.716</b> | 0.279        | -1.207        |
| NKRF       | 0.772        | -1.064       | 0.056        | -1.645        | <b>0.031</b> | <b>-1.751</b> |
| NLGN4Y     | 0.311        | -1.155       | <b>0.044</b> | <b>2.045</b>  | 0.088        | 1.770         |
| NLRP7      | <b>0.023</b> | <b>2.021</b> | 0.218        | 1.790         | <b>0.020</b> | <b>3.617</b>  |
| NMRAL1     | <b>0.010</b> | <b>2.237</b> | 0.822        | -1.167        | 0.347        | 1.917         |
| NNT        | <b>0.030</b> | <b>1.833</b> | 0.407        | -1.494        | 0.648        | 1.227         |
| NOP56      | 0.722        | 1.100        | <b>0.025</b> | <b>-1.839</b> | <b>0.015</b> | <b>-1.672</b> |
| NOS3       | 0.388        | 1.142        | <b>0.001</b> | <b>1.655</b>  | <b>0.000</b> | <b>1.889</b>  |
| NPRL3      | 0.515        | -1.173       | <b>0.016</b> | <b>-1.752</b> | <b>0.004</b> | <b>-2.056</b> |
| NPSR1-AS1  | 0.404        | 1.187        | 0.061        | 1.702         | <b>0.015</b> | <b>2.021</b>  |
| NR1H4      | 0.311        | -1.362       | 0.133        | -1.537        | <b>0.029</b> | <b>-2.094</b> |
| NR4A1      | 0.478        | -1.370       | <b>0.034</b> | <b>-2.721</b> | <b>0.013</b> | <b>-3.727</b> |
| NR4A2      | 0.362        | -1.312       | 0.053        | -1.828        | <b>0.002</b> | <b>-2.398</b> |
| NR4A3      | 0.331        | -1.734       | <b>0.025</b> | <b>-2.836</b> | <b>0.001</b> | <b>-4.917</b> |
| NRAS       | 0.454        | -1.104       | <b>0.084</b> | <b>-1.377</b> | <b>0.021</b> | <b>-1.520</b> |
| NRDE2      | <b>0.002</b> | <b>1.639</b> | 0.076        | -1.464        | 0.575        | 1.119         |
| NRIP1      | 0.684        | -1.089       | <b>0.001</b> | <b>-1.881</b> | <b>0.000</b> | <b>-2.048</b> |
| NRROS      | 0.500        | 1.229        | <b>0.035</b> | <b>-2.134</b> | 0.111        | -1.737        |

|           |                     |                     |                     |                      |                     |                      |
|-----------|---------------------|---------------------|---------------------|----------------------|---------------------|----------------------|
| NSUN5     | 0.414               | 1.184               | <b>0.002</b>        | <b>-2.052</b>        | <b>0.003</b>        | <b>-1.733</b>        |
| NT5C      | 0.331               | 1.403               | <u><b>0.026</b></u> | <u><b>-1.949</b></u> | 0.292               | -1.389               |
| NT5C3A    | 0.305               | -1.280              | <u><b>0.035</b></u> | <u><b>1.727</b></u>  | 0.159               | 1.350                |
| NUDT13    | 0.191               | -1.320              | <b>0.039</b>        | <b>-1.510</b>        | <b>0.001</b>        | <b>-1.993</b>        |
| NUDT17    | 0.265               | -1.131              | <b>0.012</b>        | -1.454               | <b>0.002</b>        | <b>-1.644</b>        |
| NUDT22    | <b>0.005</b>        | <b>2.025</b>        | 0.698               | -1.227               | 0.342               | 1.650                |
| NUDT3     | <u><b>0.001</b></u> | <u><b>1.707</b></u> | 0.669               | -1.115               | 0.112               | 1.531                |
| NUFIP1    | 0.902               | 1.053               | <b>0.023</b>        | <b>-2.290</b>        | <b>0.042</b>        | <b>-2.174</b>        |
| NUMA1     | 0.126               | 1.182               | <b>0.013</b>        | <b>-1.509</b>        | 0.092               | -1.277               |
| NUP133    | 0.642               | 1.066               | <u><b>0.000</b></u> | <u><b>-1.817</b></u> | <u><b>0.000</b></u> | <u><b>-1.704</b></u> |
| NUP155    | 0.301               | -1.216              | <u><b>0.027</b></u> | <u><b>-1.720</b></u> | <u><b>0.004</b></u> | <u><b>-2.092</b></u> |
| NUP37     | 0.709               | 1.121               | <u><b>0.004</b></u> | <u><b>-2.079</b></u> | <u><b>0.032</b></u> | <u><b>-1.854</b></u> |
| NUTM2A    | 0.688               | 1.068               | 0.059               | 1.602                | <b>0.032</b>        | <b>1.711</b>         |
| NXF1      | 0.469               | 1.092               | <b>0.004</b>        | <b>-1.530</b>        | <b>0.024</b>        | -1.401               |
| OBFC1     | 0.403               | 1.169               | <b>0.004</b>        | <b>1.801</b>         | <b>0.000</b>        | <b>2.106</b>         |
| OCEL1     | <b>0.001</b>        | <b>2.735</b>        | 0.217               | -2.013               | 0.553               | 1.359                |
| OCM       | <b>0.013</b>        | <b>2.199</b>        | 0.352               | -1.575               | 0.514               | 1.396                |
| OCRL      | <u><b>0.012</b></u> | <u><b>2.115</b></u> | 0.444               | -1.514               | 0.520               | 1.397                |
| ODC1      | 0.470               | -1.179              | <u><b>0.035</b></u> | <u><b>-1.808</b></u> | <u><b>0.008</b></u> | <u><b>-2.131</b></u> |
| OGFOD2    | 0.552               | 1.167               | <b>0.017</b>        | <b>3.849</b>         | <b>0.010</b>        | <b>4.491</b>         |
| OGFR      | 0.140               | 1.416               | <b>0.011</b>        | <b>-2.033</b>        | 0.097               | -1.435               |
| OGFR-AS1  | 0.702               | 1.135               | <b>0.010</b>        | <b>-4.199</b>        | <b>0.017</b>        | <b>-3.701</b>        |
| OR10V2P   | <b>0.006</b>        | <b>2.624</b>        | 0.247               | -2.132               | 0.737               | 1.231                |
| OR2A4     | <b>0.020</b>        | <b>1.831</b>        | 0.794               | 1.062                | <b>0.024</b>        | <b>1.946</b>         |
| OR2A7     | <b>0.006</b>        | <b>1.928</b>        | 0.572               | -1.134               | 0.073               | 1.699                |
| OR52K1    | 0.311               | 1.416               | 0.165               | 1.965                | <b>0.041</b>        | <b>2.782</b>         |
| OR52K2    | 0.143               | 1.599               | 0.225               | 1.560                | <b>0.009</b>        | <b>2.494</b>         |
| OR7E5P    | 0.077               | 1.391               | 0.175               | 1.581                | <b>0.039</b>        | <b>2.200</b>         |
| OR9A2     | <b>0.012</b>        | <b>2.368</b>        | 0.668               | 1.075                | <b>0.006</b>        | <b>2.545</b>         |
| ORC5      | 0.490               | 1.299               | <b>0.034</b>        | <b>-2.802</b>        | 0.115               | -2.157               |
| ORM1      | <b>0.030</b>        | <b>2.015</b>        | 0.127               | -2.094               | 0.929               | -1.039               |
| ORM2      | <b>0.008</b>        | <b>1.975</b>        | 0.631               | -1.269               | 0.373               | 1.556                |
| OSBP      | 0.925               | 1.015               | <u><b>0.002</b></u> | <u><b>-1.532</b></u> | <b>0.002</b>        | <b>-1.510</b>        |
| OSBPL11   | 0.276               | 1.196               | <b>0.009</b>        | 1.345                | <b>0.003</b>        | <b>1.609</b>         |
| OSGEP     | <b>0.034</b>        | <b>2.182</b>        | 0.106               | -2.370               | 0.849               | -1.086               |
| OSGIN2    | <b>0.010</b>        | -1.389              | 0.245               | -1.237               | <b>0.015</b>        | <b>-1.718</b>        |
| OTUD6B    | 0.844               | -1.043              | <b>0.048</b>        | <b>-1.512</b>        | 0.054               | -1.577               |
| OVCH1-AS1 | <b>0.029</b>        | <b>1.955</b>        | <b>0.039</b>        | <b>1.663</b>         | <b>0.000</b>        | <b>3.250</b>         |
| P2RY10    | 0.378               | 1.438               | <b>0.044</b>        | <b>-2.287</b>        | 0.234               | -1.591               |



|          |                     |                      |                     |                      |                     |                      |
|----------|---------------------|----------------------|---------------------|----------------------|---------------------|----------------------|
| PABPC4   | 0.288               | 1.382                | <b><u>0.030</u></b> | <b><u>-2.689</u></b> | 0.102               | -1.946               |
| PAGR1    | <b>0.046</b>        | <b>1.633</b>         | 0.659               | 1.172                | 0.075               | 1.914                |
| PANK4    | 0.490               | 1.154                | 0.090               | 2.095                | <b>0.048</b>        | <b><u>2.418</u></b>  |
| PAPD5    | 0.081               | -1.405               | 0.588               | -1.127               | <b>0.039</b>        | <b><u>-1.583</u></b> |
| PAPSS2   | <b><u>0.033</u></b> | <b><u>1.668</u></b>  | 0.364               | 1.698                | 0.101               | 2.833                |
| PARP16   | <b>0.026</b>        | <b>1.538</b>         | 0.796               | -1.070               | 0.213               | 1.437                |
| PARP3    | 0.759               | -1.058               | <b>0.038</b>        | <b>1.684</b>         | 0.072               | 1.591                |
| PARP9    | 0.396               | -1.177               | <b>0.018</b>        | <b>1.673</b>         | 0.097               | 1.421                |
| PASK     | <b><u>0.007</u></b> | <b><u>-1.523</u></b> | 0.164               | 1.307                | 0.417               | -1.165               |
| PATE2    | 0.905               | 1.016                | <b>0.035</b>        | <b>1.538</b>         | <b>0.035</b>        | <b>1.563</b>         |
| PATL2    | 0.145               | 1.249                | <b>0.038</b>        | <b>-1.501</b>        | 0.266               | -1.202               |
| PBDC1    | <b>0.018</b>        | <b>2.266</b>         | 0.388               | -1.649               | 0.581               | 1.374                |
| PCDHA5   | <b>0.018</b>        | <b>1.638</b>         | 0.467               | -1.181               | 0.250               | 1.387                |
| PCYT2    | 0.531               | 1.210                | <b>0.010</b>        | <b>-3.640</b>        | <b>0.023</b>        | <b>-3.009</b>        |
| PDCD7    | 0.188               | -1.196               | 0.144               | -1.471               | <b>0.049</b>        | <b>-1.759</b>        |
| PDCL3    | 0.341               | -1.457               | 0.154               | -1.953               | <b>0.031</b>        | <b>-2.846</b>        |
| PDE5A    | 0.847               | 1.029                | <b><u>0.015</u></b> | <b><u>1.900</u></b>  | <b><u>0.012</u></b> | <b><u>1.955</u></b>  |
| PDE6D    | <b>0.000</b>        | <b>1.882</b>         | 0.393               | -1.382               | 0.397               | 1.363                |
| PDE6H    | <b><u>0.014</u></b> | <b><u>2.414</u></b>  | <b><u>0.012</u></b> | <b><u>-4.370</u></b> | 0.253               | -1.810               |
| PDE9A    | <b><u>0.036</u></b> | <b><u>1.972</u></b>  | 0.265               | -1.859               | 0.912               | 1.060                |
| PDHA1    | 0.430               | 1.089                | <b>0.037</b>        | <b>-1.610</b>        | 0.073               | -1.479               |
| PDK3     | 0.412               | 1.155                | 0.117               | 1.315                | <b>0.037</b>        | <b>1.519</b>         |
| PDRG1    | <b>0.042</b>        | <b>-2.097</b>        | 0.227               | 2.389                | 0.854               | 1.140                |
| PECAM1   | <b>0.035</b>        | 1.400                | 0.505               | 1.159                | <b>0.047</b>        | <b>1.623</b>         |
| PER1     | 0.252               | -1.434               | <b><u>0.017</u></b> | <b><u>-3.730</u></b> | <b>0.005</b>        | <b><u>-5.349</u></b> |
| PEX1     | <b>0.044</b>        | <b>1.633</b>         | 0.193               | -1.381               | 0.280               | 1.182                |
| PEX11B   | 0.108               | 1.240                | <b>0.006</b>        | <b>-1.688</b>        | 0.067               | -1.361               |
| PFKFB2   | 0.295               | -1.223               | 0.073               | -1.796               | <b>0.025</b>        | <b>-2.197</b>        |
| PFN2     | 0.652               | 1.149                | 0.077               | 1.762                | <b>0.038</b>        | <b>2.025</b>         |
| PGM5     | <b><u>0.019</u></b> | <b><u>2.177</u></b>  | 0.323               | -1.421               | 0.212               | 1.532                |
| PGM5-AS1 | <b>0.005</b>        | <b>2.418</b>         | 0.614               | -1.321               | 0.302               | 1.830                |
| PGP      | <b>0.016</b>        | <b>1.820</b>         | 0.110               | -1.805               | 0.977               | 1.009                |
| PGPEP1L  | <b>0.040</b>        | <b>1.722</b>         | 0.713               | -1.251               | 0.596               | 1.377                |
| PHF1     | 0.723               | -1.114               | 0.064               | -1.556               | <b>0.033</b>        | <b>-1.734</b>        |
| PHF15    | 0.082               | -1.170               | <b>0.015</b>        | <b>-1.521</b>        | <b>0.003</b>        | <b>-1.779</b>        |
| PIAS2    | 0.340               | 1.273                | <b>0.022</b>        | <b>-1.631</b>        | 0.273               | -1.281               |
| PIAS3    | 0.312               | -1.201               | <b>0.003</b>        | <b>-1.684</b>        | <b>0.000</b>        | <b>-2.022</b>        |
| PICALM   | 0.517               | 1.103                | <b>0.009</b>        | <b>1.509</b>         | <b>0.006</b>        | <b>1.664</b>         |
| PIGK     | <b>0.031</b>        | <b>1.770</b>         | 0.790               | -1.088               | 0.088               | 1.628                |

|            |                     |                     |                     |                      |                     |                      |
|------------|---------------------|---------------------|---------------------|----------------------|---------------------|----------------------|
| PIGO       | 0.079               | -1.180              | <b>0.018</b>        | -1.281               | <b>0.001</b>        | <b>-1.511</b>        |
| PIGV       | 0.993               | 1.003               | <b>0.048</b>        | <b>-1.884</b>        | <b>0.044</b>        | <b>-1.879</b>        |
| PIH1D2     | <b>0.040</b>        | <b>1.823</b>        | 0.926               | 1.041                | 0.199               | 1.898                |
| PIK3AP1    | 0.755               | -1.047              | <b>0.010</b>        | <b>1.594</b>         | <b>0.012</b>        | <b>1.522</b>         |
| PIM2       | 0.133               | -1.389              | 0.180               | -1.253               | <b>0.010</b>        | <b>-1.741</b>        |
| PIN1       | <b>0.018</b>        | <b>1.867</b>        | 0.500               | -1.379               | 0.509               | 1.354                |
| PINX1      | 0.227               | -1.213              | 0.208               | -1.237               | <b>0.035</b>        | <b>-1.500</b>        |
| PIP5K1B    | <b>0.034</b>        | 1.429               | <u><b>0.006</b></u> | <u><b>-1.526</b></u> | 0.632               | -1.068               |
| PITHD1     | 0.481               | 1.109               | <b>0.008</b>        | <b>-1.617</b>        | <b>0.014</b>        | -1.457               |
| PITRM1-AS1 | 0.743               | 1.116               | <b>0.036</b>        | <b>-2.080</b>        | 0.052               | -1.863               |
| PKDREJ     | 0.748               | -1.149              | <b>0.037</b>        | <b>-2.497</b>        | <b>0.026</b>        | <b>-2.870</b>        |
| PKI55      | <b>0.023</b>        | <b>2.070</b>        | 0.981               | 1.011                | 0.108               | 2.093                |
| PKN3       | <u><b>0.017</b></u> | <u><b>2.071</b></u> | 0.210               | -1.552               | 0.353               | 1.334                |
| PKP4       | <b>0.034</b>        | <b>1.531</b>        | 0.622               | -1.202               | 0.512               | 1.273                |
| PLAU       | 0.346               | -1.803              | <b>0.022</b>        | <b>-3.351</b>        | <b>0.005</b>        | <b>-6.043</b>        |
| PLAUR      | 0.234               | -1.351              | 0.141               | -1.314               | <b>0.021</b>        | <b>-1.776</b>        |
| PLCB1      | <u><b>0.046</b></u> | <u><b>1.523</b></u> | 0.125               | -1.470               | 0.878               | 1.036                |
| PLCD1      | <u><b>0.017</b></u> | <u><b>1.793</b></u> | <u><b>0.000</b></u> | <u><b>-2.924</b></u> | <u><b>0.002</b></u> | <u><b>-1.630</b></u> |
| PLCD3      | 0.754               | 1.048               | <b>0.041</b>        | 1.472                | <b>0.039</b>        | <b>1.542</b>         |
| PLCL2      | 0.117               | 1.222               | 0.075               | 1.251                | <b>0.002</b>        | <b>1.528</b>         |
| PLK2       | 0.121               | -1.332              | <u><b>0.023</b></u> | <u><b>-1.801</b></u> | <u><b>0.003</b></u> | <u><b>-2.400</b></u> |
| PLK3       | 0.921               | -1.028              | <b>0.017</b>        | <b>-1.586</b>        | 0.070               | -1.631               |
| PLK4       | 0.118               | 2.141               | <b>0.046</b>        | <b>-3.962</b>        | 0.344               | -1.850               |
| PLOD3      | <b>0.009</b>        | <b>2.324</b>        | <u><b>0.004</b></u> | <u><b>-3.200</b></u> | 0.282               | -1.377               |
| PNMA1      | 0.386               | 1.322               | <b>0.012</b>        | <b>-2.945</b>        | <b>0.034</b>        | <b>-2.227</b>        |
| POC5       | <b>0.032</b>        | <b>2.081</b>        | 0.891               | -1.047               | <b>0.036</b>        | <b>1.988</b>         |
| PODNL1     | 0.381               | -1.175              | <b>0.028</b>        | <b>-1.761</b>        | <b>0.009</b>        | <b>-2.070</b>        |
| POFUT2     | 0.544               | -1.132              | 0.078               | -1.373               | <b>0.016</b>        | <b>-1.554</b>        |
| POLD3      | 0.382               | 1.158               | 0.095               | 1.412                | <b>0.030</b>        | <b>1.634</b>         |
| POLE       | <u><b>0.035</b></u> | <u><b>1.896</b></u> | 0.323               | -1.821               | 0.943               | 1.041                |
| POLE3      | 0.898               | 1.026               | <u><b>0.011</b></u> | <u><b>-1.864</b></u> | <b>0.012</b>        | <b>-1.816</b>        |
| POLE4      | <b>0.003</b>        | <b>2.705</b>        | 0.408               | -1.569               | 0.300               | 1.724                |
| POLI       | <b>0.045</b>        | 1.241               | 0.244               | 1.213                | <b>0.026</b>        | <b>1.504</b>         |
| POLR1C     | 0.805               | 1.096               | <b>0.011</b>        | <b>-3.435</b>        | <b>0.015</b>        | <b>-3.135</b>        |
| POLR2G     | <u><b>0.018</b></u> | <u><b>2.208</b></u> | 0.165               | -2.139               | 0.949               | 1.032                |
| POLR2H     | <u><b>0.030</b></u> | <u><b>2.109</b></u> | 0.248               | -2.224               | 0.934               | -1.055               |
| POLR2J3    | 0.532               | -1.080              | <b>0.022</b>        | -1.445               | <b>0.009</b>        | <b>-1.560</b>        |
| POLR3B     | <u><b>0.026</b></u> | <u><b>1.528</b></u> | 0.092               | -1.604               | 0.847               | -1.050               |
| POLR3C     | 0.970               | 1.009               | <u><b>0.001</b></u> | <u><b>-1.943</b></u> | <b>0.003</b>        | <b>-1.926</b>        |

|           |              |               |              |               |              |               |
|-----------|--------------|---------------|--------------|---------------|--------------|---------------|
| POLR3E    | 0.257        | -1.466        | <b>0.039</b> | <b>-1.708</b> | <b>0.005</b> | <b>-2.504</b> |
| PON3      | 0.424        | 1.097         | 0.063        | 1.478         | <b>0.028</b> | <b>1.621</b>  |
| POT1      | 0.103        | 1.297         | 0.091        | 1.219         | <b>0.003</b> | <b>1.581</b>  |
| POTEF     | <b>0.015</b> | 1.355         | 0.159        | 1.339         | <b>0.015</b> | <b>1.815</b>  |
| POTEI     | 0.181        | 1.291         | 0.242        | 1.291         | <b>0.032</b> | <b>1.667</b>  |
| PPDPF     | 0.135        | -1.587        | 0.239        | -1.532        | <b>0.035</b> | <b>-2.432</b> |
| PPIAP30   | <b>0.046</b> | 1.352         | <b>0.038</b> | <b>1.504</b>  | <b>0.002</b> | <b>2.034</b>  |
| PPIH      | 0.604        | -1.211        | <b>0.048</b> | <b>-2.962</b> | <b>0.023</b> | <b>-3.588</b> |
| PPM1M     | 0.164        | 1.257         | 0.179        | 1.323         | <b>0.025</b> | <b>1.663</b>  |
| PPP1R15A  | 0.828        | -1.052        | <b>0.047</b> | <b>-1.569</b> | 0.066        | -1.651        |
| PPP1R15B  | 0.535        | -1.110        | <b>0.045</b> | -1.370        | <b>0.021</b> | <b>-1.521</b> |
| PPP1R37   | <b>0.031</b> | <b>1.913</b>  | 0.116        | -1.932        | 0.980        | -1.010        |
| PPP1R7    | <b>0.036</b> | <b>1.569</b>  | 0.691        | 1.160         | 0.128        | 1.820         |
| PPP2R1B   | 0.542        | 1.096         | <u>0.019</u> | <u>-1.537</u> | <b>0.050</b> | -1.402        |
| PPP2R5D   | <u>0.020</u> | <u>1.869</u>  | 0.210        | -1.487        | 0.328        | 1.257         |
| PRDM1     | <b>0.011</b> | <b>-1.534</b> | 0.237        | -1.740        | 0.059        | -2.668        |
| PRDM8     | 0.795        | 1.040         | 0.057        | 2.505         | <b>0.050</b> | <b>2.605</b>  |
| PRKAR2B   | 0.523        | -1.297        | <u>0.011</u> | <u>-2.504</u> | <u>0.004</u> | <u>-3.248</u> |
| PRKCE     | 0.568        | -1.125        | 0.070        | -1.572        | <u>0.010</u> | <u>-1.769</u> |
| PRKCQ     | 0.078        | 1.286         | 0.151        | 1.277         | <u>0.007</u> | <u>1.642</u>  |
| PRMT1     | <u>0.032</u> | <u>1.703</u>  | 0.673        | 1.243         | 0.170        | 2.116         |
| PRMT10    | 0.587        | -1.120        | <b>0.030</b> | <b>-1.766</b> | <b>0.010</b> | <b>-1.979</b> |
| PROK2     | 0.375        | 1.242         | 0.053        | 1.895         | <b>0.019</b> | <b>2.353</b>  |
| PRPS1L1   | 0.375        | -1.249        | <u>0.047</u> | <u>1.725</u>  | 0.210        | 1.381         |
| PRR12     | 0.182        | 1.521         | <b>0.049</b> | <b>-2.012</b> | 0.267        | -1.323        |
| PRR24     | <b>0.031</b> | <b>1.654</b>  | 0.608        | -1.161        | 0.178        | 1.424         |
| PRSS12    | 0.219        | 1.474         | <b>0.018</b> | <b>-2.644</b> | 0.068        | -1.795        |
| PSEN2     | <u>0.032</u> | <u>2.038</u>  | 0.571        | 1.361         | 0.089        | 2.774         |
| PSMD11    | 0.316        | 1.187         | <b>0.003</b> | <b>-1.775</b> | <b>0.004</b> | -1.495        |
| PSMD4     | <u>0.011</u> | <u>1.583</u>  | 0.990        | -1.002        | <u>0.016</u> | <u>1.580</u>  |
| PSMD5     | 0.374        | -1.121        | <b>0.017</b> | -1.466        | <b>0.004</b> | <b>-1.643</b> |
| PSMD5-AS1 | 0.375        | 1.153         | <b>0.013</b> | <b>-1.529</b> | 0.112        | -1.326        |
| PSME1     | 0.390        | 1.122         | 0.118        | 1.344         | <b>0.042</b> | <b>1.507</b>  |
| PSMG1     | 0.462        | 1.331         | <b>0.034</b> | <b>-3.169</b> | 0.094        | -2.380        |
| PTER      | <b>0.011</b> | <b>1.701</b>  | 0.696        | 1.114         | <b>0.040</b> | <b>1.895</b>  |
| PTGES     | 0.128        | -1.206        | 0.134        | -1.429        | <u>0.038</u> | <u>-1.724</u> |
| PTGES3    | 0.549        | 1.071         | <b>0.017</b> | 1.496         | <u>0.006</u> | <u>1.602</u>  |
| PTGS2     | 0.087        | 1.418         | <u>0.003</u> | <u>2.235</u>  | <u>0.000</u> | <u>3.169</u>  |
| PTMA      | 0.818        | 1.049         | <b>0.031</b> | <b>-1.934</b> | <b>0.033</b> | <b>-1.844</b> |

|             |              |               |              |               |              |               |
|-------------|--------------|---------------|--------------|---------------|--------------|---------------|
| PTPMT1      | 0.345        | 1.208         | <b>0.011</b> | <b>-2.224</b> | <b>0.030</b> | <b>-1.840</b> |
| PTPN6       | 0.184        | 1.205         | 0.172        | 1.248         | <b>0.026</b> | <b>1.504</b>  |
| PTPN9       | <b>0.002</b> | <b>2.257</b>  | 0.376        | -1.449        | 0.257        | 1.557         |
| PTPRJ       | 0.295        | 1.153         | 0.094        | 1.343         | <b>0.020</b> | <b>1.547</b>  |
| PVRL2       | <b>0.026</b> | <b>-2.164</b> | 0.975        | -1.019        | 0.169        | -2.204        |
| PZP         | <b>0.039</b> | <b>2.358</b>  | 0.938        | -1.051        | 0.225        | 2.244         |
| QSOX1       | 0.364        | -1.270        | 0.217        | -1.292        | <b>0.042</b> | <b>-1.642</b> |
| RAB11B-AS1  | <b>0.038</b> | <b>-1.605</b> | 0.953        | -1.025        | 0.244        | -1.646        |
| RAB27A      | 0.270        | 1.169         | 0.084        | 1.335         | <b>0.015</b> | <b>1.560</b>  |
| RAB39A      | <b>0.041</b> | <b>-1.791</b> | <b>0.022</b> | <b>2.525</b>  | 0.353        | 1.410         |
| RAB41       | <b>0.030</b> | <b>1.857</b>  | 0.868        | -1.072        | 0.253        | 1.732         |
| RAB4B-EGLN2 | 0.273        | 1.195         | 0.076        | 1.505         | <b>0.025</b> | <b>1.798</b>  |
| RABAC1      | 0.344        | 1.198         | 0.116        | 1.465         | <b>0.032</b> | <b>1.754</b>  |
| RABGGTB     | 0.554        | -1.132        | <b>0.006</b> | <b>-1.839</b> | <b>0.001</b> | <b>-2.082</b> |
| RAD21-AS1   | 0.929        | 1.011         | <b>0.022</b> | <b>1.571</b>  | <b>0.021</b> | <b>1.588</b>  |
| RAD23A      | 0.550        | -1.237        | 0.129        | -1.832        | <b>0.047</b> | <b>-2.265</b> |
| RANBP2      | 0.345        | -1.248        | 0.196        | -1.285        | <b>0.022</b> | <b>-1.603</b> |
| RANBP9      | 0.282        | -1.106        | <b>0.013</b> | -1.410        | <b>0.003</b> | <b>-1.559</b> |
| RANGAP1     | <b>0.016</b> | <b>-1.559</b> | 0.735        | 1.054         | <b>0.038</b> | -1.479        |
| RBM24       | <b>0.038</b> | <b>-1.933</b> | 0.477        | -2.004        | 0.190        | -3.872        |
| RBM38       | 0.823        | -1.067        | 0.113        | -1.677        | <b>0.028</b> | <b>-1.790</b> |
| RBMY2FP     | <b>0.013</b> | <b>-1.897</b> | 0.491        | 1.421         | 0.587        | -1.335        |
| RBPM5       | 0.232        | 1.446         | 0.146        | 1.437         | <b>0.032</b> | <b>2.078</b>  |
| RCOR2       | 0.285        | 1.448         | 0.050        | 2.570         | <b>0.008</b> | <b>3.722</b>  |
| RFC4        | 0.109        | -1.269        | 0.270        | -1.186        | <b>0.023</b> | <b>-1.506</b> |
| RFX2        | <b>0.043</b> | <b>1.543</b>  | 0.337        | -1.361        | 0.672        | 1.134         |
| RFXAP       | 0.826        | 1.079         | <b>0.023</b> | <b>-2.513</b> | 0.050        | -2.329        |
| RGPD3       | 0.566        | -1.139        | 0.070        | -1.467        | <b>0.015</b> | <b>-1.671</b> |
| RGPD5       | 0.442        | -1.178        | <b>0.034</b> | <b>-1.835</b> | <b>0.007</b> | <b>-2.161</b> |
| RGPD6       | 0.418        | -1.210        | <b>0.033</b> | <b>-1.792</b> | <b>0.004</b> | <b>-2.169</b> |
| RGPD8       | 0.621        | 1.090         | <b>0.003</b> | <b>-1.574</b> | <b>0.019</b> | -1.444        |
| RGR         | 0.976        | -1.004        | <b>0.013</b> | <b>1.668</b>  | <b>0.016</b> | <b>1.662</b>  |
| RGS13       | <b>0.007</b> | <b>-2.088</b> | <b>0.004</b> | <b>2.365</b>  | 0.555        | 1.133         |
| RGS2        | 0.381        | 1.129         | <b>0.020</b> | <b>1.779</b>  | <b>0.008</b> | <b>2.009</b>  |
| RGS6        | 0.171        | 1.417         | 0.112        | 1.765         | <b>0.019</b> | <b>2.502</b>  |
| RGS7        | <b>0.045</b> | <b>-2.266</b> | 0.116        | 2.216         | 0.964        | -1.022        |
| RGS9        | 0.313        | 1.305         | 0.121        | 1.461         | <b>0.020</b> | <b>1.906</b>  |
| RHOB        | 0.118        | 1.684         | 0.481        | 1.191         | <b>0.039</b> | <b>2.006</b>  |
| RILP        | 0.172        | -1.354        | <b>0.002</b> | <b>1.750</b>  | 0.259        | 1.293         |

|             |              |               |              |               |              |               |
|-------------|--------------|---------------|--------------|---------------|--------------|---------------|
| RILPL2      | 0.339        | -1.152        | <b>0.012</b> | <b>-1.595</b> | <b>0.003</b> | <b>-1.839</b> |
| RIMS2       | 0.458        | 1.318         | 0.094        | 2.113         | <b>0.029</b> | <b>2.784</b>  |
| RIN2        | 0.807        | -1.066        | <b>0.046</b> | <b>1.758</b>  | <b>0.039</b> | <b>1.649</b>  |
| RIOK1       | 0.420        | -1.248        | <b>0.009</b> | <b>-2.107</b> | <b>0.000</b> | <b>-2.629</b> |
| RIPK2       | 0.067        | -1.681        | 0.229        | -1.566        | <b>0.023</b> | <b>-2.633</b> |
| RIPK4       | <b>0.026</b> | <b>2.404</b>  | 0.668        | -1.384        | 0.466        | 1.738         |
| RMDN2       | 0.070        | 1.337         | 0.303        | 1.215         | <b>0.013</b> | <b>1.624</b>  |
| RNASE6      | 0.692        | -1.178        | <b>0.031</b> | <b>-2.424</b> | <b>0.030</b> | <b>-2.856</b> |
| RNASEL      | 0.231        | 1.299         | 0.264        | 1.380         | <b>0.049</b> | <b>1.792</b>  |
| RNASET2     | 0.361        | 1.195         | 0.152        | 1.360         | <b>0.047</b> | <b>1.626</b>  |
| RNF122      | 0.221        | 1.277         | <b>0.049</b> | <b>-1.657</b> | 0.299        | -1.298        |
| RNF144A-AS1 | <b>0.021</b> | <b>-1.588</b> | 0.092        | 1.682         | 0.838        | 1.060         |
| RNF146      | 0.264        | 1.253         | <b>0.026</b> | <b>1.710</b>  | <b>0.005</b> | <b>2.142</b>  |
| RNF181      | 0.385        | 1.220         | <b>0.022</b> | <b>-1.737</b> | <b>0.038</b> | -1.424        |
| RNF20       | <b>0.044</b> | 1.402         | 0.378        | 1.168         | <b>0.009</b> | <b>1.637</b>  |
| RNF214      | <b>0.013</b> | <b>1.613</b>  | 0.933        | -1.023        | 0.126        | 1.577         |
| RNH1        | 0.427        | 1.256         | <b>0.006</b> | <b>-2.964</b> | <b>0.022</b> | <b>-2.359</b> |
| RNLS        | 0.604        | 1.122         | 0.056        | 2.114         | <b>0.031</b> | <b>2.372</b>  |
| RNMT        | 0.950        | -1.018        | <b>0.038</b> | <b>-1.998</b> | <b>0.023</b> | <b>-2.035</b> |
| RNPEP       | <b>0.004</b> | <b>1.872</b>  | 0.953        | -1.014        | <b>0.013</b> | <b>1.846</b>  |
| RPA3-AS1    | 0.183        | 1.382         | 0.058        | 1.526         | <b>0.001</b> | <b>2.109</b>  |
| RPIA        | 0.087        | 1.547         | <b>0.018</b> | <b>-2.165</b> | 0.250        | -1.399        |
| RPL21P44    | 0.476        | 1.184         | <b>0.039</b> | <b>1.758</b>  | <b>0.011</b> | <b>2.080</b>  |
| RPL23AP53   | 0.394        | 1.165         | 0.099        | 1.436         | <b>0.035</b> | <b>1.673</b>  |
| RPL23AP7    | 0.579        | 1.069         | <b>0.018</b> | <b>1.580</b>  | <b>0.010</b> | <b>1.688</b>  |
| RPL23AP82   | 0.203        | 1.155         | 0.060        | 1.349         | <b>0.015</b> | <b>1.557</b>  |
| RPRD1B      | 0.887        | -1.025        | <b>0.024</b> | <b>-1.662</b> | <b>0.021</b> | <b>-1.703</b> |
| RPS10P7     | <b>0.044</b> | 1.365         | 0.286        | 1.332         | <b>0.042</b> | <b>1.817</b>  |
| RPS26P11    | 0.516        | -1.201        | 0.111        | -1.558        | <b>0.031</b> | <b>-1.871</b> |
| RPS6KA2     | <b>0.029</b> | <b>1.715</b>  | 0.430        | -1.307        | 0.398        | 1.312         |
| RRN3P2      | <b>0.037</b> | <b>1.582</b>  | <b>0.046</b> | <b>-1.756</b> | 0.683        | -1.110        |
| RSBN1       | 0.119        | -1.288        | 0.353        | -1.197        | <b>0.045</b> | <b>-1.542</b> |
| RSRC1       | 0.080        | 1.404         | 0.642        | 1.086         | <b>0.013</b> | <b>1.525</b>  |
| RTCB        | <b>0.046</b> | <b>2.061</b>  | 0.400        | -1.835        | 0.867        | 1.123         |
| RXRA        | 0.104        | 1.343         | 0.471        | 1.142         | <b>0.033</b> | <b>1.533</b>  |
| S100Z       | <b>0.001</b> | <b>3.434</b>  | 0.739        | -1.122        | <b>0.004</b> | <b>3.060</b>  |
| SAMD9L      | 0.732        | -1.104        | <b>0.018</b> | <b>2.047</b>  | <b>0.012</b> | <b>1.854</b>  |
| SAMHD1      | 0.587        | -1.163        | <b>0.012</b> | <b>1.951</b>  | <b>0.020</b> | <b>1.677</b>  |
| SAP30       | 0.460        | -1.126        | 0.076        | -1.504        | <b>0.034</b> | <b>-1.694</b> |

|          |              |              |              |               |              |               |
|----------|--------------|--------------|--------------|---------------|--------------|---------------|
| SART1    | 0.410        | 1.165        | <b>0.014</b> | <b>-1.528</b> | 0.056        | -1.311        |
| SCAND1   | 0.835        | 1.077        | <b>0.026</b> | <b>-2.186</b> | <b>0.014</b> | <b>-2.030</b> |
| SCARNA14 | 0.615        | -1.158       | <b>0.001</b> | <b>-4.439</b> | <b>0.001</b> | <b>-5.139</b> |
| SCARNA5  | 0.284        | 1.379        | <b>0.035</b> | <b>-1.807</b> | 0.115        | -1.311        |
| SCLY     | <b>0.000</b> | <b>2.659</b> | 0.788        | 1.135         | <b>0.048</b> | <b>3.017</b>  |
| SCML1    | 0.451        | -1.284       | 0.110        | -1.978        | <b>0.026</b> | <b>-2.541</b> |
| SCRN3    | 0.775        | 1.049        | <b>0.025</b> | <b>1.528</b>  | <b>0.012</b> | <b>1.603</b>  |
| SCRT2    | <b>0.043</b> | <b>1.654</b> | 0.776        | 1.117         | 0.130        | 1.848         |
| SCYL3    | 0.254        | 1.259        | 0.108        | 1.341         | <u>0.006</u> | <u>1.689</u>  |
| SDC2     | <u>0.042</u> | <u>2.018</u> | 0.237        | -1.409        | 0.209        | 1.432         |
| SDF4     | <b>0.013</b> | <b>2.048</b> | 0.934        | 1.030         | <b>0.037</b> | <b>2.110</b>  |
| SEC11C   | 0.132        | -1.216       | 0.144        | -1.488        | <b>0.042</b> | <b>-1.809</b> |
| SEC61B   | 0.999        | 1.000        | <b>0.036</b> | <b>-1.639</b> | <b>0.037</b> | <b>-1.639</b> |
| SECTM1   | 0.911        | 1.026        | <b>0.048</b> | <b>2.060</b>  | <b>0.048</b> | <b>2.113</b>  |
| SEL1L3   | <b>0.034</b> | <b>1.746</b> | 0.476        | -1.231        | 0.199        | 1.418         |
| SELPLG   | 0.076        | 1.764        | 0.629        | 1.185         | <b>0.030</b> | <b>2.090</b>  |
| SEMA4B   | 0.714        | 1.086        | 0.056        | 1.495         | <b>0.031</b> | <b>1.625</b>  |
| SENP3    | <b>0.009</b> | <b>1.610</b> | 0.507        | -1.253        | 0.448        | 1.285         |
| SEPSECS  | 0.560        | -1.101       | 0.063        | -1.432        | <b>0.035</b> | <b>-1.576</b> |
| SEPT14   | 0.761        | 1.060        | <b>0.001</b> | <b>1.694</b>  | <b>0.003</b> | <b>1.795</b>  |
| SERHL2   | <b>0.030</b> | <b>1.522</b> | 0.742        | 1.120         | 0.158        | 1.705         |
| SERPIND1 | 0.441        | 1.332        | <b>0.011</b> | <b>-2.071</b> | 0.139        | -1.555        |
| SERPINE2 | <b>0.045</b> | <b>1.907</b> | 0.276        | -1.848        | 0.954        | 1.032         |
| SERTAD2  | 0.756        | -1.065       | <b>0.012</b> | <b>-1.535</b> | <b>0.005</b> | <b>-1.634</b> |
| SESN1    | 0.807        | -1.053       | <b>0.016</b> | <b>-2.119</b> | <b>0.011</b> | <b>-2.232</b> |
| SESN2    | 0.233        | -1.459       | 0.215        | -1.375        | <b>0.045</b> | <b>-2.007</b> |
| SETD1A   | 0.760        | 1.080        | <u>0.009</u> | <u>-1.978</u> | <u>0.017</u> | <u>-1.832</u> |
| SETD6    | 0.880        | 1.038        | <b>0.032</b> | <b>1.679</b>  | <b>0.046</b> | <b>1.743</b>  |
| SETD8    | 0.513        | -1.129       | 0.058        | -1.645        | <b>0.029</b> | <b>-1.858</b> |
| SETDB1   | <b>0.042</b> | 1.443        | 0.553        | 1.130         | <u>0.031</u> | <u>1.630</u>  |
| SETX     | 0.187        | 1.249        | 0.075        | 1.366         | <u>0.006</u> | <u>1.707</u>  |
| SF3B5    | 0.369        | 1.200        | <b>0.004</b> | <b>-1.795</b> | 0.065        | -1.496        |
| SF11     | <b>0.008</b> | <b>1.649</b> | 0.595        | -1.141        | 0.137        | 1.446         |
| SFT2D3   | 0.199        | 1.353        | <b>0.020</b> | <b>-1.745</b> | 0.110        | -1.290        |
| SGOL2    | <b>0.024</b> | <b>1.967</b> | 0.277        | -1.582        | 0.579        | 1.243         |
| SH2B2    | 0.522        | 1.125        | <u>0.044</u> | <u>2.397</u>  | <u>0.027</u> | <u>2.697</u>  |
| SH2D4A   | <b>0.008</b> | <b>2.396</b> | 0.871        | -1.106        | 0.248        | 2.165         |
| SH3BP5L  | 0.056        | 1.332        | 0.057        | 1.380         | <b>0.001</b> | <b>1.838</b>  |
| SH3D19   | 0.407        | -1.223       | 0.120        | -1.425        | <b>0.017</b> | <b>-1.742</b> |

|          |                     |                     |                     |                      |                     |                      |
|----------|---------------------|---------------------|---------------------|----------------------|---------------------|----------------------|
| SHB      | 0.572               | -1.324              | <b>0.026</b>        | <b>-3.471</b>        | <b>0.009</b>        | <b>-4.596</b>        |
| SHROOM3  | 0.822               | 1.055               | <b>0.023</b>        | <b>1.844</b>         | <b>0.020</b>        | <b>1.946</b>         |
| SIAH3    | 0.804               | -1.041              | <b>0.044</b>        | <b>-1.902</b>        | <b>0.036</b>        | <b>-1.980</b>        |
| SIGLEC15 | <b>0.039</b>        | <b>-1.808</b>       | 0.931               | 1.046                | 0.297               | -1.729               |
| SIGMAR1  | <b>0.021</b>        | <b>1.795</b>        | 0.431               | -1.329               | 0.382               | 1.351                |
| SIK1     | 0.679               | -1.227              | <u><b>0.045</b></u> | <u><b>-2.662</b></u> | <u><b>0.008</b></u> | <u><b>-3.266</b></u> |
| SIRPD    | 0.149               | 1.317               | 0.151               | 1.629                | <b>0.043</b>        | <b>2.146</b>         |
| SLAMF7   | 0.504               | -1.155              | <b>0.009</b>        | <b>1.623</b>         | 0.110               | 1.406                |
| SLC16A14 | 0.635               | 1.192               | <b>0.017</b>        | <b>-2.666</b>        | 0.058               | -2.236               |
| SLC19A2  | 0.955               | -1.012              | <u><b>0.031</b></u> | <u><b>-3.618</b></u> | <b>0.030</b>        | <b>-3.661</b>        |
| SLC1A5   | 0.883               | -1.060              | <b>0.001</b>        | <b>-5.420</b>        | <b>0.001</b>        | <b>-5.747</b>        |
| SLC22A25 | 0.144               | 1.248               | 0.174               | 1.326                | <b>0.029</b>        | <b>1.654</b>         |
| SLC22A4  | 0.627               | -1.081              | <u><b>0.003</b></u> | <u><b>1.635</b></u>  | <u><b>0.021</b></u> | <u><b>1.512</b></u>  |
| SLC22A5  | 0.383               | 1.329               | 0.088               | 1.658                | <u><b>0.019</b></u> | <u><b>2.204</b></u>  |
| SLC25A11 | <u><b>0.018</b></u> | <u><b>2.118</b></u> | 0.341               | -1.504               | 0.396               | 1.408                |
| SLC25A29 | <b>0.046</b>        | <b>1.979</b>        | 0.139               | -1.749               | 0.736               | 1.131                |
| SLC25A3  | 0.497               | -1.126              | <b>0.009</b>        | <b>-1.523</b>        | <b>0.003</b>        | <b>-1.714</b>        |
| SLC25A36 | 0.781               | -1.087              | <b>0.004</b>        | <b>-2.156</b>        | <b>0.001</b>        | <b>-2.344</b>        |
| SLC25A51 | 0.318               | -1.209              | <b>0.040</b>        | <b>-1.772</b>        | <b>0.012</b>        | <b>-2.143</b>        |
| SLC2A5   | <u><b>0.009</b></u> | <u><b>3.120</b></u> | 0.537               | -1.720               | 0.511               | 1.814                |
| SLC34A2  | 0.154               | 1.349               | <u><b>0.013</b></u> | <u><b>2.096</b></u>  | <u><b>0.002</b></u> | <u><b>2.827</b></u>  |
| SLC35A5  | 0.132               | 1.449               | 0.416               | 1.194                | <b>0.005</b>        | <b>1.730</b>         |
| SLC35B2  | 0.420               | -1.341              | 0.139               | -1.631               | <u><b>0.040</b></u> | <u><b>-2.188</b></u> |
| SLC35D1  | 0.720               | -1.056              | 0.057               | -1.558               | <b>0.033</b>        | <b>-1.645</b>        |
| SLC36A4  | 0.466               | 1.137               | <b>0.000</b>        | <b>-1.774</b>        | <b>0.004</b>        | <b>-1.560</b>        |
| SLC3A2   | 0.786               | 1.078               | <b>0.048</b>        | <b>-1.727</b>        | <b>0.020</b>        | <b>-1.602</b>        |
| SLC40A1  | 0.276               | 1.320               | 0.248               | 1.425                | <u><b>0.039</b></u> | <u><b>1.881</b></u>  |
| SLC46A1  | 0.469               | 1.142               | 0.078               | 1.963                | <u><b>0.043</b></u> | <u><b>2.241</b></u>  |
| SLC46A2  | <b>0.033</b>        | <b>1.915</b>        | 0.966               | 1.022                | 0.195               | 1.956                |
| SLC4A2   | <b>0.025</b>        | <b>-1.894</b>       | 0.498               | 1.493                | 0.683               | -1.269               |
| SLC5A6   | 0.758               | 1.144               | <u><b>0.001</b></u> | <u><b>-4.002</b></u> | <u><b>0.001</b></u> | <u><b>-3.500</b></u> |
| SLC7A5   | 0.226               | -1.754              | <b>0.022</b>        | <b>-3.078</b>        | <b>0.002</b>        | <b>-5.399</b>        |
| SLIRP    | 0.829               | -1.054              | <b>0.022</b>        | <b>-1.876</b>        | <b>0.031</b>        | <b>-1.977</b>        |
| SMARCB1  | <b>0.017</b>        | <b>1.508</b>        | 0.297               | -1.324               | 0.632               | 1.139                |
| SMIM3    | 0.354               | 1.269               | <b>0.031</b>        | <b>-2.475</b>        | 0.084               | -1.951               |
| SMTNL1   | 0.749               | -1.103              | <b>0.029</b>        | <b>1.835</b>         | 0.065               | 1.663                |
| SMURF1   | 0.461               | -1.182              | 0.170               | -1.293               | <b>0.042</b>        | <b>-1.528</b>        |
| SNAPC4   | 0.084               | 1.454               | 0.665               | 1.112                | <b>0.050</b>        | <b>1.617</b>         |
| SNED1    | <b>0.044</b>        | <b>1.764</b>        | <b>0.015</b>        | <b>-2.044</b>        | 0.468               | -1.159               |

|             |                     |                     |              |               |                     |                      |
|-------------|---------------------|---------------------|--------------|---------------|---------------------|----------------------|
| SNHG1       | 0.735               | -1.083              | <b>0.000</b> | <b>-2.673</b> | <b>0.000</b>        | <b>-2.895</b>        |
| SNHG11      | 0.093               | 1.779               | <b>0.006</b> | <b>-3.085</b> | 0.097               | -1.734               |
| SNHG17      | 0.492               | -1.166              | <b>0.007</b> | <b>-1.954</b> | <b>0.001</b>        | <b>-2.279</b>        |
| SNHG3       | 0.238               | -1.164              | <b>0.010</b> | <b>-1.510</b> | <b>0.001</b>        | <b>-1.758</b>        |
| SNHG5       | 0.875               | 1.021               | <b>0.046</b> | <b>-1.637</b> | 0.050               | -1.604               |
| SNHG9       | 0.545               | 1.223               | <b>0.005</b> | <b>-2.757</b> | <b>0.019</b>        | <b>-2.255</b>        |
| SNORA48     | 0.326               | -1.210              | 0.137        | -1.375        | <b>0.027</b>        | <b>-1.663</b>        |
| SNORA63     | 0.406               | -1.132              | <b>0.013</b> | -1.479        | <b>0.002</b>        | <b>-1.675</b>        |
| SNORA70G    | 0.443               | -1.109              | <b>0.012</b> | -1.468        | <b>0.002</b>        | <b>-1.629</b>        |
| SNORA79     | 0.401               | -1.237              | 0.137        | -1.424        | <b>0.042</b>        | <b>-1.762</b>        |
| SNORD97     | 0.774               | -1.093              | <b>0.011</b> | <b>-1.719</b> | <b>0.035</b>        | <b>-1.880</b>        |
| SNUPN       | 0.441               | 1.086               | <b>0.026</b> | <b>-1.514</b> | 0.070               | -1.395               |
| SNX17       | <b>0.002</b>        | <b>1.979</b>        | <b>0.017</b> | <b>-1.831</b> | 0.665               | 1.080                |
| SNX20       | 0.950               | 1.008               | <b>0.028</b> | 1.497         | <b>0.024</b>        | <b>1.509</b>         |
| SNX30       | 0.586               | 1.070               | <b>0.008</b> | <b>-1.606</b> | <b>0.019</b>        | <b>-1.501</b>        |
| SNX9        | 0.995               | 1.003               | 0.056        | -2.835        | <b>0.034</b>        | <b>-2.826</b>        |
| SOX2        | <b>0.047</b>        | 1.397               | 0.090        | 1.921         | <u><b>0.022</b></u> | <u><b>2.684</b></u>  |
| SPAG5-AS1   | 0.591               | 1.121               | <b>0.010</b> | <b>-1.827</b> | <b>0.038</b>        | <b>-1.630</b>        |
| SPHK1       | 0.506               | -1.123              | 0.137        | -1.372        | <u><b>0.041</b></u> | <u><b>-1.541</b></u> |
| SPRY1       | 0.343               | -1.500              | <b>0.001</b> | <b>-3.574</b> | <b>0.000</b>        | <b>-5.363</b>        |
| SPRYD3      | 0.097               | 1.753               | 0.390        | 1.444         | <b>0.041</b>        | <b>2.531</b>         |
| SPSB3       | <b>0.049</b>        | <b>1.615</b>        | <b>0.021</b> | <b>-1.806</b> | 0.493               | -1.119               |
| SPTB        | <b>0.010</b>        | <b>1.637</b>        | 0.705        | 1.077         | <b>0.010</b>        | <b>1.764</b>         |
| SPTY2D1-AS1 | 0.827               | 1.097               | <b>0.017</b> | <b>2.822</b>  | <b>0.027</b>        | <b>3.094</b>         |
| SRSF2       | 0.364               | -1.136              | <b>0.031</b> | -1.412        | <b>0.004</b>        | <b>-1.605</b>        |
| SRSF6       | 0.622               | 1.077               | <b>0.007</b> | <b>-1.651</b> | <b>0.009</b>        | <b>-1.532</b>        |
| SSBP4       | <b>0.041</b>        | <b>-1.642</b>       | 0.963        | 1.024         | 0.376               | -1.603               |
| SSSCA1      | 0.722               | -1.083              | 0.050        | -1.554        | <b>0.012</b>        | <b>-1.683</b>        |
| ST3GAL4     | 0.179               | -1.310              | <b>0.006</b> | <b>1.553</b>  | 0.409               | 1.186                |
| ST6GALNAC3  | 0.072               | 1.624               | <b>0.007</b> | <b>-1.955</b> | 0.436               | -1.204               |
| STAG3L2     | 0.940               | 1.008               | <b>0.002</b> | <b>-1.600</b> | <b>0.002</b>        | <b>-1.588</b>        |
| STAG3L3     | 0.603               | 1.063               | <b>0.007</b> | <b>-1.776</b> | <b>0.013</b>        | <b>-1.671</b>        |
| STK11IP     | <b>0.044</b>        | 1.387               | 0.225        | 1.312         | <b>0.012</b>        | <b>1.820</b>         |
| STK25       | <u><b>0.019</b></u> | <u><b>1.936</b></u> | 0.880        | 1.080         | 0.171               | 2.092                |
| STK3        | 0.345               | 1.222               | 0.143        | 1.574         | <u><b>0.045</b></u> | <u><b>1.924</b></u>  |
| STRA13      | <b>0.018</b>        | <b>1.841</b>        | 0.409        | -1.502        | 0.682               | 1.226                |
| STRAP       | 0.494               | -1.157              | 0.206        | -1.310        | <b>0.042</b>        | <b>-1.515</b>        |
| STRIP1      | 0.758               | 1.051               | <b>0.002</b> | <b>-1.611</b> | <b>0.007</b>        | <b>-1.533</b>        |
| STX11       | 0.089               | -1.439              | <b>0.037</b> | <b>1.570</b>  | 0.652               | 1.091                |



|          |              |              |              |               |              |               |
|----------|--------------|--------------|--------------|---------------|--------------|---------------|
| STX7     | 0.310        | 1.250        | 0.148        | 1.329         | <b>0.039</b> | <b>1.661</b>  |
| STX8     | <b>0.017</b> | <b>1.987</b> | 0.976        | -1.015        | 0.181        | 1.958         |
| SUCLG1   | 0.565        | 1.066        | <u>0.007</u> | <u>-1.537</u> | <b>0.015</b> | -1.443        |
| SUCO     | 0.563        | -1.137       | <b>0.022</b> | <b>-1.543</b> | <b>0.002</b> | <b>-1.754</b> |
| SULT1A4  | 0.762        | 1.051        | <b>0.041</b> | <b>-1.593</b> | 0.082        | -1.515        |
| SUMO1P3  | 0.196        | -1.321       | 0.126        | -1.329        | <b>0.010</b> | <b>-1.755</b> |
| SUPT5H   | 0.799        | -1.053       | <b>0.015</b> | <b>-1.514</b> | <b>0.011</b> | <b>-1.594</b> |
| SYNE4    | <b>0.039</b> | <b>1.691</b> | 0.612        | -1.205        | 0.408        | 1.404         |
| SYT2     | 0.169        | 1.484        | 0.061        | 1.793         | <b>0.005</b> | <b>2.662</b>  |
| SYTL1    | <b>0.032</b> | <b>1.679</b> | 0.113        | -1.536        | 0.595        | 1.093         |
| SYVN1    | 0.151        | 1.330        | <b>0.010</b> | <b>-1.740</b> | 0.189        | -1.308        |
| TAF1C    | 0.293        | -1.240       | <b>0.003</b> | <b>-3.243</b> | <b>0.001</b> | <b>-4.021</b> |
| TAF5     | 0.476        | 1.181        | <b>0.000</b> | <b>-2.112</b> | <b>0.003</b> | <b>-1.788</b> |
| TAGAP    | 0.410        | -1.124       | <b>0.017</b> | <b>1.584</b>  | 0.053        | 1.409         |
| TAPSAR1  | 0.493        | 1.143        | <b>0.038</b> | 1.459         | <b>0.015</b> | <b>1.668</b>  |
| TARP     | <b>0.050</b> | <b>2.182</b> | 0.880        | -1.143        | 0.461        | 1.908         |
| TAS1R1   | <b>0.040</b> | <b>2.000</b> | 0.594        | -1.342        | 0.467        | 1.491         |
| TATDN1   | 0.718        | -1.044       | <b>0.007</b> | <b>1.603</b>  | <b>0.010</b> | <b>1.536</b>  |
| TATDN2   | 0.895        | -1.016       | <b>0.001</b> | <b>-1.555</b> | <b>0.001</b> | <b>-1.580</b> |
| TBC1D10A | <b>0.012</b> | <b>1.947</b> | 0.076        | -2.069        | 0.870        | -1.063        |
| TBC1D17  | <b>0.006</b> | <b>1.944</b> | 0.203        | -1.355        | <b>0.049</b> | 1.435         |
| TBCE     | <b>0.006</b> | <b>1.585</b> | 0.987        | -1.005        | 0.154        | 1.577         |
| TCAIM    | 0.368        | 1.239        | 0.098        | 1.555         | <b>0.026</b> | <b>1.927</b>  |
| TCEB2    | 0.093        | 1.392        | <b>0.002</b> | <b>-1.872</b> | 0.085        | -1.344        |
| TCHP     | <b>0.048</b> | <b>1.607</b> | 0.850        | -1.047        | 0.052        | 1.535         |
| TCOF1    | 0.725        | -1.110       | 0.150        | -1.540        | <b>0.048</b> | <b>-1.709</b> |
| TCP1     | 0.603        | -1.061       | <b>0.033</b> | <b>-1.500</b> | <b>0.018</b> | <b>-1.591</b> |
| TCTN3    | 0.434        | -1.342       | 0.146        | -1.751        | <b>0.037</b> | <b>-2.350</b> |
| TDP1     | 0.173        | 1.258        | <b>0.022</b> | <b>-1.538</b> | 0.165        | -1.223        |
| TECR     | 0.114        | 1.487        | <u>0.032</u> | <u>-1.999</u> | 0.225        | -1.344        |
| TESK1    | 0.379        | 1.289        | <u>0.045</u> | <u>-1.874</u> | 0.160        | -1.454        |
| TFCP2    | <b>0.023</b> | <b>1.691</b> | 0.962        | -1.010        | <b>0.009</b> | <b>1.674</b>  |
| TFIP11   | 0.266        | 1.228        | <b>0.000</b> | <b>-1.809</b> | <b>0.010</b> | -1.473        |
| TFPI     | 0.744        | -1.047       | <b>0.003</b> | <b>1.533</b>  | <b>0.009</b> | 1.465         |
| TGIF1    | 0.098        | -1.377       | 0.059        | -1.548        | <b>0.003</b> | <b>-2.132</b> |
| TGM3     | 0.495        | 1.189        | <b>0.048</b> | <b>2.869</b>  | <b>0.027</b> | <b>3.410</b>  |
| TGM4     | <b>0.018</b> | <b>1.939</b> | 0.315        | -1.378        | 0.246        | 1.408         |
| THOC1    | 0.529        | -1.214       | <b>0.018</b> | <b>-2.050</b> | <b>0.003</b> | <b>-2.489</b> |
| THOC6    | <b>0.046</b> | <b>1.960</b> | 0.803        | 1.055         | 0.053        | 2.067         |

|             |              |               |              |               |              |               |
|-------------|--------------|---------------|--------------|---------------|--------------|---------------|
| THUMPD3     | 0.652        | -1.087        | <b>0.012</b> | <b>-1.528</b> | <b>0.002</b> | <b>-1.661</b> |
| THYN1       | 0.346        | 1.378         | <b>0.050</b> | <b>-2.146</b> | 0.228        | -1.557        |
| TIA1        | 0.250        | 1.200         | 0.058        | 1.575         | <b>0.016</b> | <b>1.890</b>  |
| TICAM1      | 0.120        | -1.590        | 0.263        | -1.272        | <b>0.011</b> | <b>-2.022</b> |
| TICAM2      | 0.174        | 1.577         | 0.275        | 1.508         | <b>0.014</b> | <b>2.378</b>  |
| TIFA        | 0.263        | -1.267        | <b>0.010</b> | <b>2.032</b>  | 0.054        | 1.603         |
| TIGD2       | <b>0.022</b> | <b>1.790</b>  | 0.588        | -1.243        | 0.393        | 1.440         |
| TIMM17A     | 0.714        | -1.102        | <b>0.030</b> | <b>-1.730</b> | <b>0.014</b> | <b>-1.907</b> |
| TIMM8B      | <b>0.003</b> | <b>1.661</b>  | 0.118        | -1.599        | 0.881        | 1.039         |
| TIMMDC1     | <b>0.049</b> | <b>1.751</b>  | 0.442        | -1.206        | <b>0.046</b> | 1.452         |
| TINAGL1     | <b>0.046</b> | -1.238        | <b>0.036</b> | -1.315        | <b>0.002</b> | <b>-1.627</b> |
| TLE1        | 0.951        | 1.025         | <u>0.000</u> | <u>-6.252</u> | <u>0.000</u> | <u>-6.101</u> |
| TLR1        | 0.464        | 1.134         | <b>0.003</b> | <b>1.630</b>  | <b>0.002</b> | <b>1.848</b>  |
| TLR4        | 0.518        | 1.142         | <u>0.040</u> | <u>1.530</u>  | <u>0.020</u> | <u>1.746</u>  |
| TLR8        | 0.929        | -1.017        | <b>0.017</b> | <b>1.883</b>  | <b>0.023</b> | <b>1.852</b>  |
| TM2D2       | 0.483        | -1.116        | <b>0.042</b> | -1.424        | <b>0.011</b> | <b>-1.590</b> |
| TMC3        | <b>0.043</b> | <b>1.795</b>  | 0.325        | -1.588        | 0.785        | 1.131         |
| TMCO3       | 0.332        | -1.205        | 0.130        | -1.406        | <b>0.038</b> | <b>-1.695</b> |
| TMCO6       | 0.150        | 1.249         | 0.135        | 1.308         | <b>0.008</b> | <b>1.634</b>  |
| TMED8       | <b>0.037</b> | <b>1.697</b>  | 0.466        | -1.342        | 0.524        | 1.265         |
| TMEM132D    | 0.074        | 1.432         | 0.632        | 1.085         | <b>0.008</b> | <b>1.553</b>  |
| TMEM134     | <b>0.043</b> | <b>-1.729</b> | 0.073        | 1.653         | 0.864        | -1.046        |
| TMEM141     | <b>0.021</b> | <b>1.809</b>  | 0.453        | -1.450        | 0.661        | 1.248         |
| TMEM185A    | 0.928        | 1.029         | <b>0.030</b> | <b>-2.010</b> | <b>0.029</b> | <b>-1.953</b> |
| TMEM187     | <b>0.019</b> | <b>2.109</b>  | 0.962        | -1.022        | 0.173        | 2.063         |
| TMEM189     | 0.854        | -1.060        | <b>0.025</b> | <b>-2.197</b> | <b>0.013</b> | <b>-2.329</b> |
| TMEM198B    | 0.224        | 1.399         | <b>0.042</b> | <b>-2.247</b> | 0.211        | -1.605        |
| TMEM214     | <b>0.016</b> | 1.480         | <b>0.039</b> | <b>-1.554</b> | 0.789        | -1.050        |
| TMEM216     | <b>0.023</b> | <b>1.835</b>  | 0.846        | -1.136        | 0.469        | 1.615         |
| TMEM231     | <b>0.029</b> | <b>1.522</b>  | 0.199        | -1.426        | 0.798        | 1.067         |
| TMEM249     | <b>0.048</b> | <b>-1.649</b> | <b>0.023</b> | <b>1.728</b>  | 0.751        | 1.048         |
| TMEM258     | <b>0.037</b> | <b>1.683</b>  | 0.239        | -1.309        | 0.204        | 1.286         |
| TMEM39A     | 0.590        | -1.107        | 0.078        | -1.487        | <b>0.039</b> | <b>-1.647</b> |
| TMEM44-AS1  | 0.122        | 1.366         | 0.333        | 1.320         | <b>0.049</b> | <b>1.803</b>  |
| TMEM51-AS1  | 0.147        | 1.313         | 0.307        | 1.214         | <b>0.033</b> | <b>1.595</b>  |
| TMEM65      | 0.400        | 1.110         | <b>0.012</b> | <b>1.516</b>  | <b>0.004</b> | <b>1.682</b>  |
| TMEM72-AS1  | 0.137        | 1.141         | 0.053        | 1.362         | <b>0.011</b> | <b>1.555</b>  |
| TMOD2       | 0.370        | 1.258         | 0.269        | 1.272         | <b>0.038</b> | <b>1.600</b>  |
| TMPRSS11BNL | 0.920        | -1.015        | <b>0.041</b> | <b>1.637</b>  | 0.052        | 1.613         |

|              |              |               |              |               |              |               |
|--------------|--------------|---------------|--------------|---------------|--------------|---------------|
| TMUB1        | <b>0.016</b> | <b>2.382</b>  | 0.192        | 1.530         | <b>0.002</b> | <b>3.644</b>  |
| TMX2         | 0.251        | 1.253         | <b>0.000</b> | <b>-2.187</b> | <b>0.003</b> | <b>-1.745</b> |
| TNC          | 0.081        | 1.328         | 0.365        | 1.201         | <b>0.030</b> | <b>1.595</b>  |
| TNFAIP3      | 0.089        | -2.084        | <b>0.001</b> | <b>-3.316</b> | <b>0.000</b> | <b>-6.910</b> |
| TNFAIP8L2    | 0.193        | 1.746         | 0.088        | 2.399         | <b>0.009</b> | <b>4.188</b>  |
| TNFRSF10A    | 0.418        | -1.081        | 0.084        | -1.456        | <b>0.046</b> | <b>-1.574</b> |
| TNFRSF1A     | 0.633        | 1.085         | <b>0.003</b> | <b>1.571</b>  | <b>0.005</b> | <b>1.705</b>  |
| TNFRSF25     | <b>0.048</b> | -1.197        | 0.090        | -1.254        | <b>0.007</b> | <b>-1.502</b> |
| TNFRSF8      | <b>0.047</b> | <b>1.893</b>  | 0.108        | 2.549         | <b>0.016</b> | <b>4.826</b>  |
| TNFSF10      | 0.598        | -1.151        | <b>0.001</b> | <b>2.735</b>  | <b>0.001</b> | <b>2.376</b>  |
| TNXB         | 0.419        | 1.164         | 0.059        | 1.477         | <b>0.016</b> | <b>1.719</b>  |
| TOB1         | 0.835        | -1.051        | 0.058        | -2.812        | <b>0.049</b> | <b>-2.954</b> |
| TOLLIP       | 0.121        | 1.355         | 0.118        | 1.747         | <b>0.027</b> | <b>2.367</b>  |
| TOMM20       | 0.581        | -1.120        | <b>0.028</b> | <b>-1.531</b> | <b>0.006</b> | <b>-1.715</b> |
| TOMM7        | 0.956        | 1.013         | 0.061        | -1.709        | <b>0.043</b> | <b>-1.688</b> |
| TOP1MT       | 0.546        | 1.227         | <b>0.001</b> | <b>-3.438</b> | <b>0.004</b> | <b>-2.801</b> |
| TOP3B        | 0.252        | 1.346         | <b>0.034</b> | <b>-1.668</b> | 0.217        | -1.239        |
| TP53BP2      | 0.314        | -1.192        | <b>0.013</b> | -1.378        | <b>0.001</b> | <b>-1.643</b> |
| TPM4         | 0.429        | -1.143        | <b>0.009</b> | <b>1.766</b>  | <b>0.042</b> | <b>1.545</b>  |
| TPPP3        | <b>0.028</b> | <b>2.008</b>  | 0.390        | 1.163         | <b>0.010</b> | <b>2.335</b>  |
| TPST1        | 0.163        | 1.386         | <b>0.021</b> | <b>-2.368</b> | 0.120        | -1.709        |
| TPST2        | <b>0.019</b> | <b>1.644</b>  | 0.388        | 1.302         | <b>0.023</b> | <b>2.140</b>  |
| TRAFD1       | 0.539        | -1.118        | <b>0.012</b> | <b>1.560</b>  | <b>0.043</b> | 1.395         |
| TRANK1       | 0.475        | 1.201         | 0.264        | 1.279         | <b>0.038</b> | <b>1.536</b>  |
| TRAPPC1      | <b>0.012</b> | <b>1.698</b>  | 0.674        | -1.120        | 0.123        | 1.517         |
| TRAPPC8      | 0.264        | 1.186         | 0.130        | 1.292         | <b>0.025</b> | <b>1.531</b>  |
| TREML1       | 0.497        | 1.181         | 0.172        | 1.498         | <b>0.041</b> | <b>1.769</b>  |
| TREML2       | 0.418        | 1.135         | 0.077        | 1.421         | <b>0.035</b> | <b>1.613</b>  |
| TRIM21       | 0.706        | 1.117         | 0.254        | 1.372         | <b>0.040</b> | <b>1.533</b>  |
| TRIM35       | 0.259        | 1.488         | <b>0.016</b> | <b>-2.519</b> | 0.146        | -1.693        |
| TRIM41       | <b>0.019</b> | 1.439         | 0.380        | 1.206         | <b>0.019</b> | <b>1.736</b>  |
| TRIM61       | <b>0.047</b> | -1.436        | 0.130        | -1.306        | <b>0.003</b> | <b>-1.876</b> |
| TRIM6-TRIM34 | 0.344        | 1.307         | 0.153        | 1.885         | <b>0.044</b> | <b>2.465</b>  |
| TRIM9        | <b>0.022</b> | <b>2.218</b>  | 0.812        | 1.082         | <b>0.000</b> | <b>2.400</b>  |
| TRMT13       | 0.347        | 1.224         | 0.142        | 1.396         | <b>0.033</b> | <b>1.709</b>  |
| TRMU         | 0.097        | 1.599         | <b>0.016</b> | <b>-2.034</b> | 0.286        | -1.272        |
| TRNAS6       | 0.944        | 1.020         | <b>0.049</b> | <b>-3.589</b> | 0.052        | -3.519        |
| TSC22D2      | 0.276        | -1.236        | 0.228        | -1.236        | <b>0.016</b> | <b>-1.527</b> |
| TSHZ1        | <b>0.045</b> | <b>-1.550</b> | 0.444        | -1.329        | 0.079        | -2.060        |

|             |              |              |                     |                      |                     |                      |
|-------------|--------------|--------------|---------------------|----------------------|---------------------|----------------------|
| TSN         | 0.874        | 1.025        | <b>0.019</b>        | <b>-1.570</b>        | <b>0.022</b>        | <b>-1.532</b>        |
| TSNAX-DISC1 | 0.710        | 1.074        | 0.079               | 1.518                | <b>0.040</b>        | <b>1.631</b>         |
| TSPYL2      | 0.136        | -1.599       | <b>0.016</b>        | <b>-2.059</b>        | <b>0.000</b>        | <b>-3.293</b>        |
| TSPYL4      | 0.477        | 1.087        | <b>0.033</b>        | <b>-1.624</b>        | 0.060               | -1.495               |
| TTC13       | 0.091        | 1.481        | 0.768               | 1.058                | <b>0.015</b>        | <b>1.567</b>         |
| TTC31       | <b>0.027</b> | <b>1.754</b> | 0.121               | -1.782               | 0.961               | -1.016               |
| TTC38       | 0.470        | -1.266       | <b>0.031</b>        | <b>-2.450</b>        | <b>0.009</b>        | <b>-3.103</b>        |
| TTL12       | <b>0.020</b> | <b>1.874</b> | 0.751               | 1.230                | 0.222               | 2.304                |
| TUBA1A      | 0.330        | 1.173        | <u><b>0.000</b></u> | <u><b>2.008</b></u>  | <u><b>0.000</b></u> | <u><b>2.355</b></u>  |
| TUBA1B      | 0.056        | 1.320        | 0.086               | 1.642                | <b>0.017</b>        | <b>2.168</b>         |
| TUBA1C      | 0.751        | 1.053        | <u><b>0.023</b></u> | <u><b>2.027</b></u>  | <u><b>0.017</b></u> | <u><b>2.134</b></u>  |
| TUBB1       | 0.724        | 1.076        | <b>0.025</b>        | <b>-1.915</b>        | <b>0.043</b>        | <b>-1.780</b>        |
| TULP2       | 0.845        | -1.060       | <b>0.038</b>        | <b>-2.129</b>        | <b>0.031</b>        | <b>-2.257</b>        |
| TWISTNB     | 0.471        | -1.186       | <b>0.008</b>        | <b>-1.801</b>        | <b>0.003</b>        | <b>-2.136</b>        |
| TXLNG       | 0.759        | -1.071       | <b>0.012</b>        | <b>-1.816</b>        | <b>0.001</b>        | <b>-1.946</b>        |
| TXNDC11     | 0.466        | -1.205       | 0.083               | -1.489               | <b>0.014</b>        | <b>-1.795</b>        |
| UAP1        | 0.526        | -1.148       | 0.082               | -1.606               | <u><b>0.022</b></u> | <u><b>-1.844</b></u> |
| UBE2MP1     | <b>0.046</b> | <b>1.587</b> | 0.556               | 1.222                | 0.084               | 1.940                |
| UBE2O       | 0.576        | 1.105        | <b>0.028</b>        | <b>-1.618</b>        | 0.074               | -1.465               |
| UBE2W       | 0.503        | 1.129        | <b>0.020</b>        | 1.426                | <b>0.007</b>        | <b>1.611</b>         |
| UBL4A       | <b>0.002</b> | <b>3.011</b> | 0.523               | -1.489               | 0.252               | 2.023                |
| UBTD1       | <b>0.047</b> | <b>1.908</b> | 0.858               | -1.111               | 0.381               | 1.718                |
| UBTD2       | <b>0.031</b> | <b>2.028</b> | 0.742               | -1.166               | 0.223               | 1.740                |
| UG0898H09   | 0.122        | 1.227        | 0.188               | 1.319                | <b>0.039</b>        | <b>1.619</b>         |
| UGCG        | 0.812        | 1.049        | <b>0.006</b>        | <b>-1.653</b>        | <b>0.020</b>        | <b>-1.576</b>        |
| UGT2B4      | 0.492        | -1.128       | <b>0.048</b>        | -1.414               | <u><b>0.023</b></u> | <u><b>-1.594</b></u> |
| UHRF1BP1    | 0.102        | -1.259       | 0.073               | -1.570               | <b>0.015</b>        | <b>-1.976</b>        |
| ULK4P3      | <b>0.020</b> | <b>1.854</b> | 0.118               | -2.472               | 0.590               | -1.333               |
| UNC45A      | <b>0.021</b> | <b>2.102</b> | 0.415               | -1.448               | 0.323               | 1.452                |
| UPRT        | 0.562        | 1.212        | <b>0.001</b>        | <b>-2.855</b>        | <b>0.019</b>        | <b>-2.355</b>        |
| UQCRH       | 0.696        | -1.092       | <u><b>0.000</b></u> | <u><b>-2.360</b></u> | <u><b>0.000</b></u> | <u><b>-2.578</b></u> |
| USP14       | 0.262        | -1.274       | <b>0.036</b>        | <b>-1.565</b>        | <b>0.003</b>        | <b>-1.994</b>        |
| USP36       | 0.476        | -1.367       | 0.092               | -2.096               | <b>0.023</b>        | <b>-2.866</b>        |
| USP42       | 0.331        | -1.236       | 0.214               | -1.276               | <b>0.023</b>        | <b>-1.577</b>        |
| USP47       | 0.327        | -1.202       | 0.229               | -1.266               | <b>0.029</b>        | <b>-1.522</b>        |
| USPL1       | 0.141        | -1.430       | 0.277               | -1.353               | <b>0.030</b>        | <b>-1.935</b>        |
| UTP14C      | <b>0.006</b> | <b>1.782</b> | 0.471               | -1.194               | 0.065               | 1.491                |
| UTP20       | 0.310        | -1.160       | <b>0.010</b>        | -1.437               | <b>0.002</b>        | <b>-1.667</b>        |
| UTS2B       | 0.621        | 1.091        | <b>0.043</b>        | <b>1.982</b>         | <b>0.028</b>        | <b>2.163</b>         |

|            |                     |                     |              |               |              |               |
|------------|---------------------|---------------------|--------------|---------------|--------------|---------------|
| VAMP8      | <b>0.020</b>        | <b>2.568</b>        | 0.922        | 1.073         | 0.193        | 2.755         |
| VBP1       | 0.176               | 1.329               | 0.422        | 1.165         | <b>0.003</b> | <b>1.549</b>  |
| VDAC2      | 0.813               | -1.040              | <b>0.030</b> | -1.453        | <b>0.018</b> | <b>-1.512</b> |
| VILL       | 0.508               | -1.274              | 0.124        | -1.805        | <b>0.049</b> | <b>-2.299</b> |
| VIMP       | 0.271               | 1.272               | <b>0.005</b> | <b>-2.060</b> | <b>0.020</b> | <b>-1.620</b> |
| VPS11      | <b>0.036</b>        | 1.383               | <b>0.028</b> | <b>-1.741</b> | 0.287        | -1.258        |
| VPS25      | <b>0.043</b>        | -1.426              | 0.168        | -1.398        | <b>0.012</b> | <b>-1.994</b> |
| VPS26B     | <b>0.016</b>        | <b>1.616</b>        | <b>0.007</b> | <b>-1.717</b> | 0.609        | -1.062        |
| VPS45      | 0.510               | 1.316               | <b>0.044</b> | <b>-2.621</b> | 0.154        | -1.992        |
| VPS72      | 0.061               | 1.645               | 0.346        | 1.294         | <b>0.008</b> | <b>2.128</b>  |
| VPS9D1-AS1 | 0.536               | -1.165              | <b>0.018</b> | <b>2.227</b>  | 0.053        | 1.911         |
| VWF        | <u><b>0.009</b></u> | <u><b>2.862</b></u> | 0.740        | -1.194        | 0.119        | 2.397         |
| WASH5P     | <b>0.036</b>        | <b>1.934</b>        | 0.075        | -2.005        | 0.917        | -1.036        |
| WASIR2     | <b>0.001</b>        | -1.292              | 0.192        | -1.163        | <b>0.005</b> | <b>-1.502</b> |
| WBP11      | 0.713               | -1.071              | <b>0.028</b> | -1.498        | <b>0.007</b> | <b>-1.604</b> |
| WDFY3-AS2  | <b>0.028</b>        | <b>2.036</b>        | 0.489        | -1.397        | 0.416        | 1.457         |
| WDR12      | 0.280               | -1.160              | <b>0.019</b> | <b>-1.896</b> | <b>0.007</b> | <b>-2.200</b> |
| WDR43      | 0.401               | -1.389              | <b>0.002</b> | <b>-2.816</b> | <b>0.000</b> | <b>-3.911</b> |
| WDR45B     | 0.996               | -1.001              | <b>0.002</b> | <b>-1.715</b> | <b>0.011</b> | <b>-1.717</b> |
| WDR52      | <b>0.028</b>        | <b>1.834</b>        | 0.730        | -1.163        | 0.321        | 1.577         |
| WDR59      | <b>0.011</b>        | <b>1.892</b>        | <b>0.015</b> | <b>-2.017</b> | 0.786        | -1.066        |
| WDR6       | <b>0.034</b>        | <b>1.805</b>        | 0.226        | -1.567        | 0.635        | 1.152         |
| WDR77      | 0.340               | 1.265               | <b>0.008</b> | <b>-1.877</b> | <b>0.050</b> | -1.485        |
| WDSUB1     | 0.870               | 1.046               | <b>0.002</b> | <b>-2.063</b> | <b>0.014</b> | <b>-1.973</b> |
| WDYHV1     | 0.058               | 1.901               | <b>0.007</b> | <b>-3.760</b> | 0.121        | -1.977        |
| WHAMM      | 0.203               | -1.282              | 0.061        | -1.458        | <b>0.003</b> | <b>-1.869</b> |
| WNT4       | 0.177               | 1.209               | <b>0.042</b> | <b>1.933</b>  | <b>0.015</b> | <b>2.337</b>  |
| WSB1       | 0.747               | 1.073               | <b>0.006</b> | <b>1.715</b>  | <b>0.004</b> | <b>1.841</b>  |
| WSB2       | 0.528               | 1.081               | <b>0.009</b> | 1.467         | <b>0.002</b> | <b>1.586</b>  |
| XAB2       | 0.934               | -1.021              | <b>0.017</b> | <b>-1.640</b> | <b>0.016</b> | <b>-1.674</b> |
| XPNPEP1    | 0.648               | -1.108              | 0.060        | -1.710        | <b>0.027</b> | <b>-1.895</b> |
| XPO5       | 0.353               | 1.390               | <b>0.044</b> | <b>-2.509</b> | 0.125        | -1.805        |
| XRRA1      | 0.425               | 1.112               | <b>0.029</b> | 1.439         | <b>0.006</b> | <b>1.600</b>  |
| YAP1       | <u><b>0.008</b></u> | <u><b>1.955</b></u> | 0.344        | 1.831         | 0.073        | 3.580         |
| YBX2       | <b>0.026</b>        | <b>2.202</b>        | 0.797        | -1.106        | 0.134        | 1.991         |
| YEATS4     | 0.941               | 1.025               | <b>0.041</b> | <b>-2.256</b> | 0.053        | -2.202        |
| YTHDF3-AS1 | <b>0.005</b>        | <b>2.153</b>        | 0.904        | 1.069         | 0.172        | 2.301         |
| YWHAH      | <u><b>0.014</b></u> | <u><b>2.168</b></u> | 0.336        | -1.509        | 0.357        | 1.437         |
| ZBED4      | 0.069               | 1.312               | <b>0.038</b> | <b>-1.686</b> | 0.266        | -1.285        |

|              |              |              |              |               |              |               |
|--------------|--------------|--------------|--------------|---------------|--------------|---------------|
| ZBTB1        | 0.564        | -1.130       | <b>0.012</b> | <b>-1.690</b> | <b>0.005</b> | <b>-1.909</b> |
| ZBTB10       | 0.998        | -1.001       | 0.071        | -2.245        | <b>0.039</b> | <b>-2.247</b> |
| ZBTB25       | 0.878        | -1.028       | <b>0.009</b> | <b>-1.724</b> | <b>0.010</b> | <b>-1.773</b> |
| ZBTB5        | 0.507        | -1.279       | 0.131        | -1.614        | <b>0.018</b> | <b>-2.065</b> |
| ZC3H12A      | 0.224        | -1.639       | <b>0.030</b> | <b>-1.977</b> | <b>0.003</b> | <b>-3.241</b> |
| ZCCHC12      | <b>0.035</b> | <b>1.726</b> | 0.107        | -2.723        | 0.436        | -1.578        |
| ZCCHC18      | 0.791        | -1.106       | <b>0.040</b> | <b>-3.339</b> | <b>0.029</b> | <b>-3.693</b> |
| ZDHHC13      | <b>0.035</b> | <b>1.770</b> | <b>0.037</b> | <b>-1.649</b> | 0.681        | 1.073         |
| ZDHHC7       | 0.702        | -1.057       | <b>0.011</b> | -1.473        | <b>0.009</b> | <b>-1.556</b> |
| ZFAND5       | 0.143        | -1.190       | 0.077        | -2.758        | <b>0.048</b> | <b>-3.281</b> |
| ZFAS1        | 0.312        | -1.153       | 0.051        | -1.596        | <b>0.020</b> | <b>-1.840</b> |
| ZFP36L2      | 0.220        | -1.253       | <b>0.007</b> | <b>-2.469</b> | <b>0.002</b> | <b>-3.092</b> |
| ZHX1-C8ORF76 | 0.855        | 1.049        | <b>0.035</b> | <b>-1.717</b> | <b>0.019</b> | <b>-1.637</b> |
| ZHX2         | 0.223        | 1.181        | 0.145        | 1.365         | <b>0.040</b> | <b>1.613</b>  |
| ZNF134       | 0.513        | 1.142        | <b>0.045</b> | <b>-1.612</b> | 0.083        | -1.412        |
| ZNF14        | 0.677        | 1.067        | <b>0.042</b> | <b>-1.548</b> | 0.081        | -1.450        |
| ZNF140       | 0.143        | 1.499        | 0.230        | 1.511         | <b>0.026</b> | <b>2.266</b>  |
| ZNF165       | 0.462        | -1.359       | <b>0.015</b> | <b>-2.873</b> | <b>0.004</b> | <b>-3.905</b> |
| ZNF197       | <b>0.006</b> | 1.347        | 0.236        | 1.138         | <b>0.001</b> | <b>1.533</b>  |
| ZNF200       | 0.313        | 1.217        | <b>0.024</b> | <b>1.816</b>  | <b>0.007</b> | <b>2.210</b>  |
| ZNF212       | <b>0.044</b> | <b>1.750</b> | <b>0.022</b> | <b>-1.974</b> | 0.624        | -1.128        |
| ZNF217       | 0.355        | 1.213        | 0.089        | 1.425         | <b>0.025</b> | <b>1.729</b>  |
| ZNF281       | 0.270        | -1.183       | 0.103        | -1.476        | <b>0.033</b> | <b>-1.746</b> |
| ZNF322       | <b>0.033</b> | <b>1.968</b> | 0.974        | -1.011        | <b>0.044</b> | <b>1.948</b>  |
| ZNF326       | 0.684        | -1.114       | <b>0.020</b> | <b>-1.668</b> | <b>0.010</b> | <b>-1.858</b> |
| ZNF331       | 0.237        | -1.331       | 0.173        | -1.616        | <b>0.039</b> | <b>-2.151</b> |
| ZNF34        | 0.161        | 1.527        | <b>0.011</b> | <b>-2.858</b> | 0.072        | -1.872        |
| ZNF41        | 0.100        | 1.794        | 0.636        | 1.170         | <b>0.027</b> | <b>2.098</b>  |
| ZNF415       | <b>0.018</b> | <b>1.883</b> | <b>0.044</b> | <b>-2.190</b> | 0.652        | -1.163        |
| ZNF418       | <b>0.005</b> | <b>2.167</b> | 0.822        | 1.102         | 0.061        | 2.388         |
| ZNF433       | 0.936        | 1.021        | <b>0.043</b> | <b>-1.762</b> | <b>0.044</b> | <b>-1.726</b> |
| ZNF438       | 0.720        | 1.077        | 0.086        | 1.650         | <b>0.047</b> | <b>1.777</b>  |
| ZNF441       | 0.088        | 1.475        | 0.096        | 1.485         | <b>0.008</b> | <b>2.190</b>  |
| ZNF443       | 0.073        | 1.765        | <b>0.032</b> | <b>-2.172</b> | 0.471        | -1.231        |
| ZNF496       | 0.111        | -1.519       | 0.542        | -1.187        | <b>0.039</b> | <b>-1.804</b> |
| ZNF511       | <b>0.024</b> | <b>1.899</b> | 0.122        | -1.988        | 0.910        | -1.047        |
| ZNF561       | 0.309        | 1.147        | <b>0.008</b> | <b>-1.571</b> | 0.061        | -1.369        |
| ZNF581       | 0.897        | 1.029        | <b>0.039</b> | <b>-1.544</b> | <b>0.018</b> | <b>-1.501</b> |
| ZNF582       | <b>0.048</b> | <b>1.847</b> | 0.237        | -2.148        | 0.811        | -1.163        |

|            |              |               |              |               |              |               |
|------------|--------------|---------------|--------------|---------------|--------------|---------------|
| ZNF583     | <b>0.017</b> | <b>2.584</b>  | 0.366        | 1.612         | <b>0.021</b> | <b>4.164</b>  |
| ZNF589     | <b>0.047</b> | <b>1.586</b>  | 0.668        | -1.162        | 0.372        | 1.366         |
| ZNF600     | <b>0.029</b> | <b>1.947</b>  | 0.995        | -1.004        | 0.313        | 1.939         |
| ZNF606     | <b>0.027</b> | <b>1.690</b>  | 0.705        | 1.183         | 0.147        | 1.999         |
| ZNF613     | 0.916        | -1.029        | <b>0.007</b> | <b>1.944</b>  | <b>0.028</b> | <b>1.889</b>  |
| ZNF624     | <b>0.022</b> | <b>2.195</b>  | 0.567        | 1.464         | 0.101        | 3.213         |
| ZNF629     | <b>0.004</b> | <b>2.052</b>  | 0.157        | -1.595        | 0.368        | 1.287         |
| ZNF638     | 0.247        | 1.270         | 0.076        | 1.351         | <b>0.012</b> | <b>1.716</b>  |
| ZNF641     | <b>0.024</b> | <b>1.697</b>  | 0.525        | 1.134         | <b>0.002</b> | <b>1.924</b>  |
| ZNF66      | <b>0.012</b> | <b>2.031</b>  | 0.959        | 1.021         | 0.123        | 2.074         |
| ZNF660     | <b>0.043</b> | <b>2.134</b>  | 0.779        | -1.206        | 0.415        | 1.770         |
| ZNF667-AS1 | 0.096        | 1.708         | 0.870        | -1.040        | <b>0.034</b> | <b>1.642</b>  |
| ZNF668     | 0.067        | 1.775         | <b>0.000</b> | <b>-3.557</b> | <b>0.001</b> | <b>-2.004</b> |
| ZNF706     | 0.714        | 1.080         | <b>0.001</b> | <b>-2.171</b> | <b>0.003</b> | <b>-2.010</b> |
| ZNF720     | 0.390        | 1.092         | <b>0.002</b> | 1.432         | <b>0.000</b> | <b>1.564</b>  |
| ZNF767     | 0.125        | 1.482         | 0.331        | 1.420         | <b>0.043</b> | <b>2.104</b>  |
| ZNF784     | <b>0.024</b> | <b>2.268</b>  | <b>0.046</b> | <b>-2.154</b> | 0.858        | 1.053         |
| ZNF805     | 0.061        | -1.239        | 0.268        | -1.212        | <b>0.033</b> | <b>-1.502</b> |
| ZNF821     | 0.760        | -1.084        | <b>0.025</b> | <b>-1.680</b> | <b>0.006</b> | <b>-1.822</b> |
| ZNHIT3     | 0.445        | -1.089        | <b>0.044</b> | -1.468        | <b>0.019</b> | <b>-1.599</b> |
| ZSCAN32    | 0.885        | 1.025         | <b>0.004</b> | <b>1.775</b>  | <b>0.005</b> | <b>1.819</b>  |
| ZSCAN4     | <b>0.045</b> | <b>-1.580</b> | 0.314        | 1.263         | 0.377        | -1.250        |

| Gene Symbol | Norm ROS CD v Ctrl |        | Low ROS CD v Ctrl |       |
|-------------|--------------------|--------|-------------------|-------|
|             | P-value            | FC     | P-value           | FC    |
| ABCC5       | -                  | -      | 0.029             | 1.563 |
| ABCF1       | 0.026              | -1.694 | 0.020             | 1.699 |
| ACAD8       | 0.035              | -1.747 | -                 | -     |
| ACAT2       | 0.006              | -2.159 | 0.000             | 3.076 |
| ACOX1       | -                  | -      | 0.023             | 1.801 |
| ACSM3       | -                  | -      | 0.038             | 2.127 |
| ACSS2       | -                  | -      | 0.031             | 1.562 |
| ADAM10      | -                  | -      | 0.035             | 1.502 |
| ADCY10      | -                  | -      | 0.024             | 2.357 |
| AFG3L2      | 0.038              | -2.314 | -                 | -     |
| AKT1S1      | 0.044              | -1.727 | -                 | -     |
| ALOX12      | 0.016              | -1.565 | -                 | -     |
| AP2M1       | 0.028              | -1.506 | -                 | -     |
| B3GNT4      | 0.019              | -2.266 | 0.042             | 2.121 |
| B4GALT1     | -                  | -      | 0.004             | 1.769 |
| BAD         | 0.003              | -1.823 | 0.042             | 1.650 |
| BCAT2       | 0.045              | -1.527 | 0.028             | 1.719 |
| BMI1        | 0.024              | -2.674 | -                 | -     |
| BMP2        | 0.033              | -2.053 | 0.011             | 2.885 |
| BMP6        | 0.040              | -1.741 | -                 | -     |
| C4A         | -                  | -      | 0.020             | 1.848 |
| CAB39       | -                  | -      | 0.019             | 1.505 |
| CACNA1A     | 0.005              | 2.458  | 0.009             | 2.174 |
| CACNA1E     | -                  | -      | 0.038             | 1.893 |
| CARM1       | 0.016              | -2.480 | 0.022             | 2.155 |
| CAT         | -                  | -      | 0.012             | 2.042 |
| CBR4        | -                  | -      | 0.021             | 1.602 |
| CD14        | -                  | -      | 0.000             | 3.295 |
| CD320       | -                  | -      | 0.049             | 1.509 |
| CD58        | 0.032              | 1.531  | -                 | -     |
| CDIPT       | -                  | -      | 0.050             | 1.671 |
| CDK11A      | -                  | -      | 0.002             | 1.528 |
| CDK16       | 0.022              | -1.556 | 0.011             | 1.683 |
| CDK3        | 0.005              | -2.436 | 0.030             | 1.772 |
| CDK7        | -                  | -      | 0.022             | 1.537 |
| CDKN1A      | 0.015              | -2.934 | 0.001             | 6.064 |
| CHEK1       | -                  | -      | 0.040             | 1.530 |
| CHKA        | 0.031              | -1.645 | 0.009             | 1.938 |
| CMPK1       | 0.021              | -1.643 | -                 | -     |
| COL1A1      | 0.002              | -3.336 | 0.002             | 3.891 |
| COMMD3-BMI1 | 0.020              | -2.683 | -                 | -     |
| COX4I1      | 0.001              | -2.121 | 0.001             | 2.091 |
| COX5B       | 0.005              | -1.782 | -                 | -     |
| COX7A2L     | 0.015              | -2.112 | -                 | -     |
| CRAT        | 0.000              | -4.868 | 0.026             | 2.085 |
| CREM        | -                  | -      | 0.019             | 1.872 |
| CRY2        | 0.002              | -2.109 | 0.000             | 2.119 |
| CRYL1       | 0.002              | -3.418 | 0.003             | 2.984 |



|         |       |        |       |       |
|---------|-------|--------|-------|-------|
| CTSA    | -     | -      | 0.030 | 1.654 |
| CXCR4   | 0.028 | -1.842 | 0.003 | 2.608 |
| DDX25   | -     | -      | 0.026 | 1.795 |
| DGAT2   | -     | -      | 0.028 | 1.768 |
| DGKE    | -     | -      | 0.006 | 1.518 |
| DLST    | -     | -      | 0.045 | 1.546 |
| DPYD    | -     | -      | 0.011 | 1.527 |
| DUT     | 0.003 | -2.323 | -     | -     |
| EDN1    | 0.015 | -2.628 | 0.002 | 3.620 |
| EIF2AK3 | 0.006 | -2.803 | 0.001 | 3.773 |
| EPHA1   | -     | -      | 0.042 | 1.776 |
| ETNK1   | -     | -      | 0.008 | 1.784 |
| FPGT    | 0.009 | 2.468  | 0.008 | 2.744 |
| GADD45A | 0.011 | -1.587 | 0.000 | 2.085 |
| GALK2   | -     | -      | 0.008 | 1.831 |
| GALT    | 0.041 | -2.201 | -     | -     |
| GPT2    | 0.004 | -2.594 | 0.027 | 1.807 |
| GSTT1   | 0.030 | -1.775 | 0.031 | 1.741 |
| GUSB    | 0.003 | -2.090 | 0.005 | 2.050 |
| HACL1   | 0.010 | -1.804 | 0.009 | 1.846 |
| HCK     | -     | -      | 0.041 | 1.599 |
| HMGCR   | -     | -      | 0.028 | 1.543 |
| HMGCS1  | 0.015 | -1.587 | 0.004 | 1.656 |
| HPSE    | 0.012 | 1.647  | 0.015 | 1.653 |
| HSPA9   | -     | -      | 0.018 | 1.679 |
| IFNAR2  | -     | -      | 0.002 | 1.665 |
| IL4I1   | -     | -      | 0.025 | 1.528 |
| IP6K2   | -     | -      | 0.002 | 1.531 |
| IRAK2   | -     | -      | 0.001 | 2.010 |
| IRS2    | -     | -      | 0.026 | 2.342 |
| ITGA6   | -     | -      | 0.048 | 1.536 |
| ITGB1   | -     | -      | 0.006 | 1.672 |
| JAG1    | 0.006 | -1.766 | 0.012 | 1.664 |
| KANSL2  | 0.003 | -1.909 | 0.001 | 1.988 |
| KAT5    | -     | -      | 0.043 | 1.698 |
| KCNJ1   | -     | -      | 0.002 | 2.198 |
| KCNQ1   | 0.019 | -1.718 | -     | -     |
| KLF5    | -     | -      | 0.020 | 1.630 |
| KPNB1   | -     | -      | 0.015 | 1.519 |
| LTBR    | -     | -      | 0.004 | 2.863 |
| MAP2K6  | 0.046 | 2.009  | -     | -     |
| MAP3K1  | 0.000 | 1.536  | 0.000 | 1.686 |
| MAP3K8  | -     | -      | 0.016 | 2.364 |
| MAPK14  | -     | -      | 0.046 | 1.732 |
| MAPK6   | -     | -      | 0.008 | 1.698 |
| MAT2B   | -     | -      | 0.007 | 1.544 |
| MED16   | -     | -      | 0.020 | 1.551 |
| MED30   | 0.013 | -1.505 | 0.002 | 1.736 |
| MEF2D   | 0.003 | -1.603 | 0.007 | 1.616 |
| MVD     | 0.001 | -3.170 | 0.002 | 3.480 |

|         |       |        |       |       |
|---------|-------|--------|-------|-------|
| NDUFA5  | 0.034 | -1.542 | 0.042 | 1.511 |
| NDUFS6  | 0.008 | -2.547 | 0.043 | 1.848 |
| NDUFV2  | 0.026 | -1.596 | 0.005 | 1.895 |
| NFKB2   | -     | -      | 0.022 | 1.821 |
| NFKBIA  | 0.002 | -2.158 | 0.001 | 3.406 |
| NOS3    | 0.001 | 1.655  | 0.000 | 1.889 |
| NR4A1   | 0.034 | -2.721 | 0.013 | 3.727 |
| NRAS    | -     | -      | 0.021 | 1.520 |
| NRIP1   | 0.001 | -1.881 | 0.000 | 2.048 |
| NT5C    | 0.026 | -1.949 | -     | -     |
| NT5C3A  | 0.035 | 1.727  | -     | -     |
| NUP133  | 0.000 | -1.817 | 0.000 | 1.704 |
| NUP155  | 0.027 | -1.720 | 0.004 | 2.092 |
| NUP37   | 0.004 | -2.079 | 0.032 | 1.854 |
| ODC1    | 0.035 | -1.808 | 0.008 | 2.131 |
| OSBP    | 0.002 | -1.532 | -     | -     |
| PABPC4  | 0.030 | -2.689 | -     | -     |
| PANK4   | -     | -      | 0.048 | 2.418 |
| PDE5A   | 0.015 | 1.900  | 0.012 | 1.955 |
| PDE6H   | 0.012 | -4.370 | -     | -     |
| PDK3    | -     | -      | 0.037 | 1.519 |
| PER1    | 0.017 | -3.730 | 0.005 | 5.349 |
| PIP5K1B | 0.006 | -1.526 | -     | -     |
| PLCD1   | 0.000 | -2.924 | 0.002 | 1.630 |
| PLK2    | 0.023 | -1.801 | 0.003 | 2.400 |
| PLOD3   | 0.004 | -3.200 | -     | -     |
| POLE3   | 0.011 | -1.864 | -     | -     |
| POLR3C  | 0.001 | -1.943 | -     | -     |
| PPP2R1B | 0.019 | -1.537 | -     | -     |
| PRKAR2B | 0.011 | -2.504 | 0.004 | 3.248 |
| PRKCE   | -     | -      | 0.010 | 1.769 |
| PRKCQ   | -     | -      | 0.007 | 1.642 |
| PRPS1L1 | 0.047 | 1.725  | -     | -     |
| PSMD4   | -     | -      | 0.016 | 1.580 |
| PTGES   | -     | -      | 0.038 | 1.724 |
| PTGES3  | -     | -      | 0.006 | 1.602 |
| PTGS2   | 0.003 | 2.235  | 0.000 | 3.169 |
| PTPN6   | -     | -      | 0.026 | 1.504 |
| RANBP2  | -     | -      | 0.022 | 1.603 |
| RIMS2   | -     | -      | 0.029 | 2.784 |
| RIPK2   | -     | -      | 0.023 | 2.633 |
| RNASEL  | -     | -      | 0.049 | 1.792 |
| RNF20   | -     | -      | 0.009 | 1.637 |
| RNLS    | -     | -      | 0.031 | 2.372 |
| RPIA    | 0.018 | -2.165 | -     | -     |
| RXRA    | -     | -      | 0.033 | 1.533 |
| SCYL3   | -     | -      | 0.006 | 1.689 |
| SETD1A  | 0.009 | -1.978 | 0.017 | 1.832 |
| SETDB1  | -     | -      | 0.031 | 1.630 |
| SETX    | -     | -      | 0.006 | 1.707 |

|          |       |        |       |       |
|----------|-------|--------|-------|-------|
| SH2B2    | 0.044 | 2.397  | 0.027 | 2.697 |
| SIK1     | 0.045 | -2.662 | 0.008 | 3.266 |
| SLC19A2  | 0.031 | -3.618 | -     | -     |
| SLC22A4  | 0.003 | 1.635  | 0.021 | 1.512 |
| SLC22A5  | -     | -      | 0.019 | 2.204 |
| SLC34A2  | 0.013 | 2.096  | 0.002 | 2.827 |
| SLC35B2  | -     | -      | 0.040 | 2.188 |
| SLC40A1  | -     | -      | 0.039 | 1.881 |
| SLC46A1  | -     | -      | 0.043 | 2.241 |
| SLC5A6   | 0.001 | -4.002 | 0.001 | 3.500 |
| SOX2     | -     | -      | 0.022 | 2.684 |
| SPHK1    | -     | -      | 0.041 | 1.541 |
| STK3     | -     | -      | 0.045 | 1.924 |
| SUCLG1   | 0.007 | -1.537 | -     | -     |
| SULT1A4  | 0.041 | -1.593 | -     | -     |
| TECR     | 0.032 | -1.999 | -     | -     |
| TESK1    | 0.045 | -1.874 | -     | -     |
| TLE1     | 0.000 | -6.252 | 0.000 | 6.101 |
| TLR4     | 0.040 | 1.530  | 0.020 | 1.746 |
| TNFRSF1A | 0.003 | 1.571  | 0.005 | 1.705 |
| TNXB     | -     | -      | 0.016 | 1.719 |
| TOB1     | -     | -      | 0.049 | 2.954 |
| TUBA1A   | 0.000 | 2.008  | 0.000 | 2.355 |
| TUBA1C   | 0.023 | 2.027  | 0.017 | 2.134 |
| UAP1     | -     | -      | 0.022 | 1.844 |
| UGT2B4   | -     | -      | 0.023 | 1.594 |
| UQCRH    | 0.000 | -2.360 | 0.000 | 2.578 |

| Ontology                                     | Up LowROS CD v CTRL                                                                                                                                           | Down LowROS CD v CTRL                                                                                                                                                 | Up NormROS CD v CTRL                                   | Down NormROS CD v CTRL                                                                                                             | Up LowROS CD v NormROS CD                                                                                          |
|----------------------------------------------|---------------------------------------------------------------------------------------------------------------------------------------------------------------|-----------------------------------------------------------------------------------------------------------------------------------------------------------------------|--------------------------------------------------------|------------------------------------------------------------------------------------------------------------------------------------|--------------------------------------------------------------------------------------------------------------------|
| <b>ATP binding</b>                           | P=2.05E-8: ADCY10, STK3, MAPK14, SETX, GALK2, RNASEL, PDK3, KCN11, SLC22A4, SLC22A5, SCLY3, PANK4, DDX25, ABCG5, ETNK1, DGKE, PRKCQ, ACS2, HCK, MAP3K1, EPHA1 | P=4.72E-7: CDK16, PLK2, ABCF1, ACSM3, SPHK1, MAP3K8, RIPK2, IRAK2, CDK11A, SIK1, PRKCE, CHEK1, PFKFB2, MAP3K, CHA, EIF2AK3, HSPA9, MVD, IP6K2, CDK3, CDK7             | -                                                      | P=1.97E-2: CDK16, CMPK1, PLK2, ABCF1, AFG3L2, PIP5K1B, SIK1, CHKA, TESK1, EIF2AK3, MVD, CDK3                                       | P=5.91E-4: EPHB4, MKKS, ACSL3, DNAJA3, PASK, KCNJ1, RPS6KA2, ABCG5, RIPK4, MERTK, ACS2, PAPS2, PKN3, STK25         |
| <b>Carbohydrate metabolism</b>               | -                                                                                                                                                             | P=9.11E-7: B3GNT4, DDIT4, RANBP2, BAD, SIK1, PRKCE, IRS2, PLCD1, PFKFB2, BAG1, GALT1                                                                                  | -                                                      | P=0.021: B3GNT4, CRYL1, GALT, PDHA1, GUS8, BAD, SIK1, PLCD1                                                                        | P=5.64E-6: HEXA, PASK, GALT, AGL, GYS1, GRB10, SLC25A11, PLCD1, CSALNACT1, HVAL2, SLC2A5, PGM5, DERA               |
| <b>Carboxylic acid metabolic process</b>     | P=1.24E-9: CBR4, CACNA1A, DPYD, MAPK14, DGAT2, PDK3, ACOX1, SLC22A4, SLC22A5, TLR4, KYAT3, PSMD4, SLC46A1, TNFRSF1A, ACS2, PTGES3, TNXB, NOS3, PTGS2          | P=9.11E-11: CRYL1, DDIT4, ACSM3, SPHK1, SLC5A6, PTGES, UGT2B4, PRKAR2B, BCAT2, PRKCE, HACL1, DLST, IRS2, PFKFB2, ODC1, GPT2, IL4I1, CRAT, EIF2AK3, CREM, EDN1, NDUFS6 | 2.47E-4: CACNA1A, NOS3, PTGS2, SLC22A4, TLR4, TNFRSF1A | P=7.37E-7: CRYL1, ACAD8, GALT, PDHA1, SLC5A6, TECR, PRKAR2B, BCAT2, HACL1, ODC1, SUCLG1, GPT2, CRAT, EIF2AK3, ALOX12, EDN1, NDUFS6 | -                                                                                                                  |
| <b>Fatty Acid Metabolism</b>                 | P=9.36E-8: CBR4, MAPK14, DGAT2, PDK3, ACOX1, TLR4, TNFRSF1A, ACS2, PTGES3, TNXB, PTGS2                                                                        | P=5.97E-8: CRYL1, ACSM3, SPHK1, PTGES, PRKAR2B, HACL1, IRS2, CRAT, EIF2AK3, CREM, EDN1, NDUFS6                                                                        | P=0.005: PTGS2, TLR4, TNFRSF1A                         | P=0.042: ACAT2, TECR                                                                                                               | -                                                                                                                  |
| <b>Fatty Acid Oxidation</b>                  | P=0.005: MAPK14, DGAT2, ACOX1                                                                                                                                 | -                                                                                                                                                                     | -                                                      | P=8.06E-4: ACAD8, HACL1, CRAT, ALOX12                                                                                              | P=0.005: ACAD8, HADH, CRAT                                                                                         |
| <b>Galactose Metabolism</b>                  | P=0.045: GALK2                                                                                                                                                | -                                                                                                                                                                     | -                                                      | -                                                                                                                                  | P=9.53E-4: GALT, PGM5                                                                                              |
| <b>Glucose Transport/Import</b>              | P=0.009: MAPK14, RNASEL, SH2B2                                                                                                                                | P=7.34E-5: RANBP2, NUP155, NUP37, NUP133, IRS2, EDN1                                                                                                                  | -                                                      | P=2.56E-3: NUP155, NUP37, NUP133                                                                                                   | -                                                                                                                  |
| <b>Glycogen biosynthesis</b>                 | -                                                                                                                                                             | -                                                                                                                                                                     | -                                                      | -                                                                                                                                  | P=0.0012: PPP2R5D, AGL, GYS1                                                                                       |
| <b>Insulin secretion</b>                     | P=0.009: CACNA1A, CACNA1E, HMGCR, RIMS2                                                                                                                       | P=4.26E-4: CDK16, BAD, PRKCE, IRS2, PFKFB2, EIF2AK3                                                                                                                   | -                                                      | P=0.016: CDK16, BAD, KCNQ1, EIF2AK3                                                                                                | -                                                                                                                  |
| <b>Lipopolysaccharide-mediated signaling</b> | P=1.65E-6: MAPK14, CD14, TLR4, NOS3, HCK                                                                                                                      | P=9.01E-5: NFKBIA, RIPK2, IRAK2, PRKCE                                                                                                                                | P=0.001: NOS3, TLR4                                    | -                                                                                                                                  | -                                                                                                                  |
| <b>Oxidation-reduction process</b>           | P=1.89E-4: CBR4, DPYD, MAPK14, RNLS, DGAT2, ACOX1, CAT, HMGCR, ACS2, PTGES3, NOS3, PTGS2                                                                      | -                                                                                                                                                                     | -                                                      | -                                                                                                                                  | P=3.1E-7: PASK, PLOD3, ACAD8, AGL, GYS1, ASPH, GRB10, HAAO, COX7A2L, HSD17B10, HADH, ACS2, CRAT, NDUFB7, NNT, PGM5 |
| <b>Oxidative phosphorylation</b>             | -                                                                                                                                                             | P=2.8E-5: COX4I1, NDUFA5, UQCRRH, NDUFS6, NDUFB2                                                                                                                      | -                                                      | P=0.008: NDUFA5, NDUFS6, NDUFB2                                                                                                    | -                                                                                                                  |
| <b>Reactive oxygen species biosynthesis</b>  | P=3.47E-4: MAPK14, PDK3, TLR4, CAT, NOS3, PTGS2                                                                                                               | -                                                                                                                                                                     | P=1.27E-4: NOS3, PTGS2, TLR4                           | -                                                                                                                                  | -                                                                                                                  |
| <b>Response to glucose</b>                   | P=8.05E-4: CACNA1E, MAPK14, PDK3, PRKCQ, HMGCR                                                                                                                | P=0.002: CDK16, BAD, PRKCE, IRS2, PFKFB2                                                                                                                              | -                                                      | -                                                                                                                                  | -                                                                                                                  |

| Gene          | Low ROS CD vs<br>Normal ROS CD | Normal ROS CD vs<br>Control | Low ROS CD vs<br>Control |
|---------------|--------------------------------|-----------------------------|--------------------------|
| ACTR3B        | 1.77                           | -1.01                       | 1.76                     |
| ACYP1         | 2.71                           | -1.71                       | 1.58                     |
| AMPD3         | 1.67                           | -1.08                       | 1.55                     |
| BRI3BP        | 2.23                           | -1.20                       | 1.86                     |
| CD9           | 3.50                           | -1.35                       | 2.60                     |
| CRISP3        | 2.07                           | -1.44                       | 1.44                     |
| CSGALNACT     | 1.74                           | -1.41                       | 1.24                     |
| CTXN2         | 3.43                           | -4.67                       | -1.36                    |
| DACH1         | 1.60                           | -1.05                       | 1.51                     |
| DNAJA3        | 2.45                           | -1.53                       | 1.60                     |
| DNAJC1        | -1.59                          | 1.39                        | -1.15                    |
| DNASE1L1      | 1.77                           | 1.26                        | 2.23                     |
| DUSP23        | 2.35                           | -1.66                       | 1.42                     |
| EFCAB12       | 1.52                           | -1.13                       | 1.34                     |
| EFEMP2        | 2.16                           | -2.08                       | 1.04                     |
| GRB10         | 2.04                           | -1.59                       | 1.29                     |
| GTF3C2        | 1.59                           | -1.32                       | 1.20                     |
| GYG2P1        | -1.72                          | -1.12                       | -1.93                    |
| HAAO          | 3.18                           | -1.60                       | 1.99                     |
| HYI           | 1.86                           | -1.21                       | 1.54                     |
| ITFG1         | 1.50                           | -1.01                       | 1.49                     |
| KBTBD11       | 1.90                           | -2.03                       | -1.07                    |
| LINC00654     | 2.42                           | -1.17                       | 2.07                     |
| LINC01012788  | -2.58                          | -1.25                       | -3.23                    |
| LINC010192793 | 1.68                           | -1.08                       | 1.56                     |
| LRRC34        | 1.83                           | -1.32                       | 1.38                     |
| MCU           | 1.52                           | -1.19                       | 1.28                     |
| MYCBP2-AS1    | 1.68                           | -1.36                       | 1.24                     |
| NAA10         | 1.53                           | 1.39                        | 2.14                     |
| NAT9          | 1.65                           | -1.00                       | 1.65                     |
| NDUFB7        | 2.03                           | -1.20                       | 1.69                     |
| NEED8-MDP     | 1.87                           | -1.35                       | 1.38                     |
| NRDE2         | 1.56                           | -1.39                       | 1.12                     |
| NUDT3         | 1.55                           | -1.01                       | 1.53                     |
| OCEL1         | 2.70                           | -1.99                       | 1.36                     |
| OCRL          | 2.38                           | -1.71                       | 1.40                     |
| OR2A7         | 1.88                           | -1.11                       | 1.70                     |
| ORM2          | 1.84                           | -1.18                       | 1.56                     |
| PBDC1         | 2.63                           | -1.92                       | 1.37                     |
| PDE6D         | 1.65                           | -1.21                       | 1.36                     |
| POLE4         | 2.66                           | -1.54                       | 1.72                     |
| PSMD4         | 1.61                           | -1.02                       | 1.58                     |
| PTPN9         | 2.10                           | -1.35                       | 1.56                     |
| PYCR1         | -1.81                          | 1.59                        | -1.14                    |
| RANGAP1       | -1.66                          | 1.12                        | -1.48                    |
| RAP2B         | 1.57                           | -1.36                       | 1.16                     |
| RAPGEFL1      | 1.55                           | -1.09                       | 1.43                     |
| RBMY2FP       | -2.00                          | 1.50                        | -1.34                    |

|         |       |       |      |
|---------|-------|-------|------|
| RGS13   | -1.81 | 2.04  | 1.13 |
| RNPEP   | 1.83  | 1.01  | 1.85 |
| S100Z   | 3.23  | -1.06 | 3.06 |
| SCLY    | 2.47  | 1.22  | 3.02 |
| SLC46A2 | 2.27  | -1.16 | 1.96 |
| SNX17   | 1.71  | -1.58 | 1.08 |
| SPECC1L | 1.52  | -1.32 | 1.15 |
| TBC1D17 | 1.74  | -1.21 | 1.44 |
| TIMM8B  | 1.60  | -1.54 | 1.04 |
| UBL4A   | 3.02  | -1.49 | 2.02 |
| ZNF629  | 1.81  | -1.41 | 1.29 |

| Gene       | chrom | pos       | ref | alt | rsID        | AA change | Alt allele effect | cadd | dbSNP MAF | hg19 pos  | ExAC freq   | ExAC European MAF | ExAC African MAF | ExAC East Asian MAF | ExAC South Asian MAF | Validation                             |
|------------|-------|-----------|-----|-----|-------------|-----------|-------------------|------|-----------|-----------|-------------|-------------------|------------------|---------------------|----------------------|----------------------------------------|
| ACTR3B     | chr7  | 152800645 | A   | G   | Novel       | Y72C      | nonSynonymous     | 25.2 | -         | 152497730 | -           | -                 | -                | -                   | -                    | -                                      |
| ACTR3B     | chr7  | 152801700 | G   | A   | Novel       | R102Q     | nonSynonymous     | 34   | -         | 152498785 | -           | -                 | -                | -                   | -                    | -                                      |
| ACTR3B     | chr7  | 152823439 | C   | T   | rs149559061 | A261V     | nonSynonymous     | 20.3 | 0.000514  | 152520524 | 0.0005271   | 0.000809207       | 0.000288351      | 0                   | 0.000181686          | byCluster,byFrequency,by1000G          |
| ACTR3B     | chr7  | 152823405 | C   | T   | rs140327402 | R250W     | nonSynonymous     | 23.5 | 0.049862  | 152520490 | 0.05        | 0.052101826       | 0.014148219      | 0.003929727         | 0.09446472           | byCluster,byFrequency,by1000G          |
| ACTR3B     | chr7  | 152820410 | G   | C   | rs781547923 | E218Q     | nonSynonymous     | 26.2 | 0.000013  | 152517495 | 0.00000824  | 0                 | 0.000130548      | 0                   | 0 unknown            | 0                                      |
| AMPD3      | chr11 | 10493490  | G   | A   | rs75286033  | G361S     | nonSynonymous     | 13.8 | 0.003524  | 10515037  | 0.003278    | 0                 | 0.035521236      | 0.000115875         | 0                    | 0 byCluster,byFrequency,by1000G        |
| AMPD3      | chr11 | 10487341  | C   | T   | rs76836360  | R306W     | nonSynonymous     | 35   | 0.000032  | 10508888  | 0.0006342   | 0                 | 0.00664228       | 0                   | 0.000242336          | byCluster,byFrequency,by1000G          |
| AMPD3      | chr11 | 10493476  | G   | A   | rs61388455  | R356Q     | nonSynonymous     | 21.4 | 0.001784  | 10515023  | 0.00159     | 6.01287E-05       | 0.016968762      | 0                   | 0                    | 0 byCluster,byFrequency,by1000G        |
| AMPD3      | chr11 | 10495666  | T   | C   | rs36003153  | Y455H     | nonSynonymous     | 16.5 | 0.007748  | 10517213  | 0.007083    | 0.000135131       | 0.075959129      | 0.000115714         | 0                    | 0 byCluster,byFrequency,by1000G        |
| AMPD3      | chr11 | 10496826  | C   | T   | rs144107914 | S482L     | nonSynonymous     | 20.7 | 0.000008  | 10518373  | 0.000313    | 0.000554407       | 0                | 0                   | 0                    | 0 byCluster,byFrequency                |
| AMPD3      | chr11 | 10478587  | G   | A   | rs149433198 | D95N      | nonSynonymous     | 28.9 | 0.000668  | 10500134  | 0.0006671   | 0.001215669       | 0                | 0                   | 0                    | 0 byCluster,byFrequency                |
| AMPD3      | chr11 | 10493383  | A   | G   | rs147246880 | N325S     | nonSynonymous     | 16.4 | 0.001061  | 10514930  | 0.001095    | 0.001665266       | 0                | 0                   | 0.000242248          | byCluster,byFrequency,by1000G          |
| AMPD3      | chr11 | 10500097  | T   | G   | rs146000615 | F523L     | nonSynonymous     | 21.6 | 0.00133   | 10521644  | 0.001367    | 0.002113753       | 0.000480862      | 0                   | 0                    | 0 byCluster,byFrequency,by1000G        |
| AMPD3      | chr11 | 10487356  | G   | T   | rs117706710 | V311L     | nonSynonymous     | 27.4 | 0.000008  | 10508903  | 0.00733     | 0.011290032       | 0.001637765      | 0                   | 0.002544529          | byCluster,byFrequency,by1000G          |
| AMPD3      | chr11 | 10482189  | C   | T   | rs11042836  | R185W     | nonSynonymous     | 21.7 | 0.000008  | 10503736  | 0.054       | 0.07738295        | 0.013084853      | 0.000116306         | 0.016545455          | byCluster,byFrequency,byHapMap,by1000G |
| AMPD3      | chr11 | 10493425  | C   | T   | rs201115705 | T339M     | nonSynonymous     | 26.4 | 0.000437  | 10514972  | 0.0004365   | 0.000645045       | 0                | 0.000115687         | 0                    | 0 byCluster,byFrequency                |
| AMPD3      | chr11 | 10461608  | G   | A   | rs373716662 | R30Q      | nonSynonymous     | 23.7 | 0.000087  | 10483155  | 0.00008236  | 1.49876E-05       | 0                | 0.000808875         | 0.000121124          | byCluster,byFrequency,by1000G          |
| AMPD3      | chr11 | 10482160  | G   | A   | rs762205591 | R175Q     | nonSynonymous     | 27.2 | 0.000066  | 10503707  | 0.00006589  | 3.02179E-05       | 0                | 0.00023218          | 0.000121124          | byCluster,byFrequency                  |
| BRI3BP     | chr12 | 124993909 | G   | C   | Novel       | G40A      | nonSynonymous     | 11.5 | -         | 125478455 | -           | -                 | -                | -                   | -                    | -                                      |
| BRI3BP     | chr12 | 124993933 | G   | C   | Novel       | R48P      | nonSynonymous     | 28.6 | -         | 125478479 | -           | -                 | -                | -                   | -                    | -                                      |
| BRI3BP     | chr12 | 124993947 | T   | G   | Novel       | F53V      | nonSynonymous     | 11.8 | -         | 125478493 | -           | -                 | -                | -                   | -                    | -                                      |
| BRI3BP     | chr12 | 124993948 | T   | G   | Novel       | F53C      | nonSynonymous     | 25.3 | -         | 125478494 | -           | -                 | -                | -                   | -                    | -                                      |
| BRI3BP     | chr12 | 124993954 | A   | C   | Novel       | Q55P      | nonSynonymous     | 24.4 | -         | 125478500 | -           | -                 | -                | -                   | -                    | -                                      |
| BRI3BP     | chr12 | 124993955 | G   | C   | Novel       | Q55H      | nonSynonymous     | 25.3 | -         | 125478501 | -           | -                 | -                | -                   | -                    | -                                      |
| BRI3BP     | chr12 | 124993962 | A   | C   | Novel       | S58R      | nonSynonymous     | 24.4 | -         | 125478508 | -           | -                 | -                | -                   | -                    | -                                      |
| BRI3BP     | chr12 | 125025038 | C   | T   | rs367895302 | P122S     | nonSynonymous     | 27.3 | 0.000058  | 125509584 | 0.00005766  | 9.02609E-05       | 0                | 0                   | 6.0687E-05           | byCluster,byFrequency                  |
| BRI3BP     | chr12 | 125025105 | G   | C   | rs369500614 | G144A     | nonSynonymous     | 25.3 | 0.000165  | 125509651 | 0.0001647   | 0.000269833       | 0.000192234      | 0                   | 0                    | 0 byCluster,byFrequency                |
| BRI3BP     | chr12 | 124993932 | C   | A   | rs868801899 | R48S      | nonSynonymous     | 26.7 | -         | 125478478 | -           | -                 | -                | -                   | -                    | unknown                                |
| CD9        | chr12 | 6236255   | A   | G   | rs150663369 | I201V     | nonSynonymous     | 23.4 | 0.000538  | 6345421   | 0.0005518   | 0.000869878       | 0                | 0                   | 0                    | 0 byCluster,byFrequency,by1000G        |
| CD9        | chr12 | 6235299   | G   | A   | rs35799798  | R140Q     | nonSynonymous     | 27.4 | 0.000609  | 6344465   | 0.000626    | 0.000884187       | 0                | 0.000115554         | 0.00060562           | byCluster,byFrequency,by1000G          |
| CD9        | chr12 | 6236250   | T   | G   | rs770637195 | V199G     | nonSynonymous     | 28.2 | 0.000008  | 6345416   | 0.000008236 | 1.49966E-05       | 0                | 0                   | 0                    | 0 unknown                              |
| CRISP3     | chr6  | 49733839  | C   | T   | rs149267211 | C109Y     | nonSynonymous     | 25.6 | 0.000066  | 49701552  | 0.00006589  | 0.000120243       | 0                | 0                   | 0                    | 0 byCluster,byFrequency                |
| CRISP3     | chr6  | 49733743  | C   | G   | rs75675396  | G141A     | nonSynonymous     | 23.8 | 0.000008  | 49701456  | 0.004555    | 0.001874007       | 0.000192197      | 0.0007973192        | 0.000484555          | byCluster,byFrequency,by1000G          |
| CRISP3     | chr6  | 49733726  | A   | G   | rs1864312   | A147S     | nonSynonymous     | 10.6 | 0.000008  | 49701439  | 0.426       | 0.448097924       | 0.28830994       | 0.293179191         | 0.336423119          | byCluster,byFrequency,byHapMap,by1000G |
| CRISP3     | chr6  | 49737414  | C   | T   | rs371866465 | G18S      | nonSynonymous     | 13.5 | 0.000092  | 49705127  | 0.0000906   | 0.000168252       | 0                | 0                   | 0                    | 0 byCluster,byFrequency                |
| CRISP3     | chr6  | 49731165  | A   | C   | rs757797049 | C216F     | nonSynonymous     | 32   | 0.000008  | 49698878  | 0.000008236 | 1.50177E-05       | 0                | 0                   | 0                    | 0 unknown                              |
| CSGALNACT1 | chr8  | 194505704 | G   | A   | -           | A44V      | nonSynonymous     | 12.3 | -         | 19363215  | -           | -                 | -                | -                   | -                    | -                                      |
| CSGALNACT1 | chr8  | 19458601  | G   | A   | rs147069782 | L226F     | nonSynonymous     | 27.9 | 0.000617  | 19316112  | 0.0005683   | 1.49835E-05       | 0.0060542        | 0                   | 6.0562E-05           | byCluster,byFrequency,by1000G          |
| CSGALNACT1 | chr8  | 19405929  | C   | T   | rs139076756 | E484K     | nonSynonymous     | 28   | 0.000008  | 19263440  | 0.00001647  | 2.99706E-05       | 0                | 0                   | 0                    | 0 byCluster,byFrequency                |
| CSGALNACT1 | chr8  | 19405940  | C   | T   | rs144295336 | R480H     | nonSynonymous     | 23.1 | 0.001092  | 19263451  | 0.001062    | 4.49573E-05       | 0.011147415      | 0                   | 0                    | 0 byCluster,byFrequency,by1000G        |
| CSGALNACT1 | chr8  | 19505795  | G   | A   | rs117494579 | R14W      | nonSynonymous     | 28.7 | 0.000024  | 19363306  | 0.002331    | 6.054E-05         | 0.00029615       | 0.030891645         | 0.00036483           | byCluster,byFrequency,by1000G          |
| CSGALNACT1 | chr8  | 19405961  | A   | T   | rs17128366  | F473Y     | nonSynonymous     | 27.3 | 0.004913  | 19263472  | 0.004538    | 0.000119883       | 0.049875072      | 0                   | 0.000121124          | byCluster,byFrequency,byHapMap,by1000G |
| CSGALNACT1 | chr8  | 19505426  | C   | T   | rs17128518  | V137I     | nonSynonymous     | 11.2 | 0.002801  | 19362937  | 0.002537    | 0.000120337       | 0.027772383      | 0                   | 6.05987E-05          | byCluster,byFrequency,byHapMap,by1000G |
| CSGALNACT1 | chr8  | 19458495  | G   | A   | rs35868450  | T261M     | nonSynonymous     | 22.8 | 0.001202  | 19316006  | 0.001211    | 0.001348557       | 0.000288295      | 0.000115554         | 0.001332364          | byCluster,byFrequency,by1000G          |
| CSGALNACT1 | chr8  | 19405817  | G   | A   | rs61910741  | R521P     | nonSynonymous     | 34   | 0.000008  | 19263328  | 0.004126    | 0.00660502        | 0.001544998      | 0                   | 0.00090843           | byCluster,byFrequency,by1000G          |
| CSGALNACT1 | chr8  | 19405979  | G   | A   | rs369428087 | T467M     | nonSynonymous     | 25.4 | 0.000641  | 19263490  | 0.0006589   | 0.000644349       | 0                | 0                   | 0.00181686           | byCluster,byFrequency,by1000G          |
| CSGALNACT1 | chr8  | 19458535  | T   | C   | rs372233360 | I248V     | nonSynonymous     | 12.6 | 0.000033  | 19316046  | 0.00003295  | 4.49506E-05       | 9.60984E-05      | 0                   | 0                    | 0 byCluster,byFrequency                |
| CSGALNACT1 | chr8  | 19420366  | T   | C   | rs745646945 | N369S     | nonSynonymous     | 22.8 | 0.000041  | 19277877  | 0.00004118  | 4.49532E-05       | 9.61354E-05      | 0                   | 6.0562E-05           | byFrequency                            |
| CSGALNACT1 | chr8  | 19505630  | G   | A   | rs755710398 | R69C      | nonSynonymous     | 33   | 0.000017  | 19363141  | 0.00001647  | 1.5024E-05        | 0                | 0.000115929         | 0                    | 0 byFrequency                          |
| CSGALNACT1 | chr8  | 19406037  | C   | T   | rs779435105 | G448R     | nonSynonymous     | 34   | 0.000115  | 19263548  | 0.0001153   | 0.000104897       | 0                | 0.000363372         | byFrequency          |                                        |
| CTXN2      | chr15 | 48201542  | C   | T   | rs190880430 | A81V      | nonSynonymous     | 31   | 0.016279  | 48493739  | 0.017       | 0.006740776       | 0                | 0                   | 0.037778905          | byCluster,byFrequency,by1000G          |
| DACH1      | chr13 | 71866195  | T   | C   | Novel       | D192G     | nonSynonymous     | 23.5 | -         | 72440327  | -           | -                 | -                | -                   | -                    | -                                      |
| DACH1      | chr13 | 71866222  | G   | T   | Novel       | P183H     | nonSynonymous     | 23.5 | -         | 72440354  | -           | -                 | -                | -                   | -                    | -                                      |
| DACH1      | chr13 | 71866235  | C   | A   | Novel       | V179L     | nonSynonymous     | 21.6 | -         | 72440367  | -           | -                 | -                | -                   | -                    | -                                      |
| DACH1      | chr13 | 71866237  | G   | C   | Novel       | P178R     | nonSynonymous     | 22.8 | -         | 72440369  | -           | -                 | -                | -                   | -                    | -                                      |
| DACH1      | chr13 | 71866238  | G   | A   | Novel       | P178S     | nonSynonymous     | 16.5 | -         | 72440370  | -           | -                 | -                | -                   | -                    | -                                      |
| DACH1      | chr13 | 71866249  | G   | A   | Novel       | S174L     | nonSynonymous     | 22.3 | -         | 72440381  | -           | -                 | -                | -                   | -                    | -                                      |
| DACH1      | chr13 | 71866268  | G   | A   | Novel       | P168S     | nonSynonymous     | 14   | -         | 72440400  | -           | -                 | -                | -                   | -                    | -                                      |
| DACH1      | chr13 | 71866270  | A   | G   | Novel       | L167P     | nonSynonymous     | 23.3 | -         | 72440402  | -           | -                 | -                | -                   | -                    | -                                      |
| DACH1      | chr13 | 71866278  | G   | C   | Novel       | C164W     | nonSynonymous     | 23.4 | -         | 72440410  | -           | -                 | -                | -                   | -                    | -                                      |
| DACH1      | chr13 | 71866279  | C   | A   | Novel       | C164F     | nonSynonymous     | 16.8 | -         | 72440411  | -           | -                 | -                | -                   | -                    | -                                      |
| DACH1      | chr13 | 71866280  | A   | G   | Novel       | C164R     | nonSynonymous     | 10.7 | -         | 72440412  | -           | -                 | -                | -                   | -                    | -                                      |
| DACH1      | chr13 | 71866649  | C   | G   | Novel       | A41P      | nonSynonymous     | 16.3 | -         | 72440787  | -           | -                 | -                | -                   | -                    | -                                      |
| DACH1      | chr13 | 71866667  | A   | G   | Novel       | S35P      | nonSynonymous     | 17.2 | -         | 72440805  | -           | -                 | -                | -                   | -                    | -                                      |
| DACH1      | chr13 | 71866676  | A   | G   | Novel       | S32P      | nonSynonymous     | 19.8 | -         | 72440814  | -           | -                 | -                | -                   | -                    | -                                      |
| DACH1      | chr13 | 71866687  | C   | G   | Novel       | G28A      | nonSynonymous     | 13.3 | -         | 72440825  | -           | -                 | -                | -                   | -                    | -                                      |
| DACH1      | chr13 | 71866690  | G   | A   | Novel       | S27F      | nonSynonymous     | 21   | -         | 72440828  | -           | -                 | -                | -                   | -                    | -                                      |
| DACH1      | chr13 | 71866703  | A   | T   | Novel       | S23T      | nonSynonymous     | 15.7 | -         | 72440841  | -           | -                 |                  |                     |                      |                                        |









|          |       |           |   |   |              |       |               |      |          |           |             |              |             |             |             |                                                                  |                                                                             |
|----------|-------|-----------|---|---|--------------|-------|---------------|------|----------|-----------|-------------|--------------|-------------|-------------|-------------|------------------------------------------------------------------|-----------------------------------------------------------------------------|
| RANGAP1  | chr22 | 41254375  | G | A | rs777615097  | P398L | nonSynonymous | 10.3 | 0.000008 | 41650379  | 0.000008236 | 0            | 0           | 0.000115607 | 0           | unknown                                                          |                                                                             |
| RANGAP1  | chr22 | 41264755  | T | A | rs780709524  | Q130L | nonSynonymous | 18   | 0.000008 | 41660759  | 0.000008236 | 1.50047E-05  | 0           | 0           | 0           | 0                                                                | unknown                                                                     |
| RAPGEFL1 | chr17 | 40184583  | T | A | Novel        | D95E  | nonSynonymous | 10.1 | -        | 38340835  | -           | -            | -           | -           | -           | -                                                                |                                                                             |
| RAPGEFL1 | chr17 | 40193768  | C | G | rs143788634  | L506V | nonSynonymous | 23.8 | 0.000157 | 38350020  | 0.0001565   | 0            | 0.001730104 | 0           | 0           | 0 byCluster,byFrequency                                          |                                                                             |
| RAPGEFL1 | chr17 | 40191625  | A | T | rs372662080  | M369L | nonSynonymous | 21.7 | 0.000102 | 38347877  | 0.00007415  | 0            | 0.001110591 | 0           | 0           | 0 byCluster,byFrequency,by1000G                                  |                                                                             |
| RAPGEFL1 | chr17 | 40188916  | G | A | rs763119373  | R144H | nonSynonymous | 28.6 | 0.000025 | 38345168  | 0.00002471  | 0            | 0.000290529 | 0           | 0           | 0 byCluster,byFrequency                                          |                                                                             |
| RAPGEFL1 | chr17 | 40193408  | C | T | rs767817765  | R468W | nonSynonymous | 27.8 | 0.000025 | 38349660  | 0.00002471  | 1.49849E-05  | 0.000192271 | 0           | 0           | 0 byFrequency                                                    |                                                                             |
| RAPGEFL1 | chr17 | 40189243  | G | A | rs768709613  | V177M | nonSynonymous | 25.4 | 0.000008 | 38345495  | 0.000008236 | 0            | 0           | 0           | 0           | 6.0562E-05 unknown                                               |                                                                             |
| RGS13    | chr1  | 192659493 | G | C | rs16834603   | L150F | nonSynonymous | 17.3 | 0.013914 | 192628623 | 0.012       | 0.000113078  | 0.139133102 | 0           | 0           | 0.000190452 byCluster,byFrequency,byHapMap,by1000G               |                                                                             |
| RGS13    | chr1  | 192644342 | G | A | rs768361269  | R3K   | nonSynonymous | 14.9 | 0.000017 | 192613472 | 0.00001647  | 3.00661E-05  | 0           | 0           | 0           | 0 byFrequency                                                    |                                                                             |
| RNPEP    | chr1  | 201983051 | C | G | Novel        | P129A | nonSynonymous | 12.6 | -        | 201952179 | -           | -            | -           | -           | -           | -                                                                |                                                                             |
| RNPEP    | chr1  | 201983058 | G | C | Novel        | R131P | nonSynonymous | 16.2 | -        | 201952186 | -           | -            | -           | -           | -           | -                                                                |                                                                             |
| RNPEP    | chr1  | 201983060 | G | C | Novel        | A132P | nonSynonymous | 12.1 | -        | 201952188 | -           | -            | -           | -           | -           | -                                                                |                                                                             |
| RNPEP    | chr1  | 201983063 | G | C | Novel        | A133P | nonSynonymous | 19.4 | -        | 201952191 | -           | -            | -           | -           | -           | -                                                                |                                                                             |
| RNPEP    | chr1  | 201983066 | G | C | Novel        | E134Q | nonSynonymous | 12.6 | -        | 201952194 | -           | -            | -           | -           | -           | -                                                                |                                                                             |
| RNPEP    | chr1  | 201983077 | G | C | Novel        | Q137H | nonSynonymous | 23.2 | -        | 201952205 | -           | -            | -           | -           | -           | -                                                                |                                                                             |
| RNPEP    | chr1  | 201983079 | T | G | Novel        | V138G | nonSynonymous | 25.5 | -        | 201952207 | -           | -            | -           | -           | -           | -                                                                |                                                                             |
| RNPEP    | chr1  | 201983087 | A | C | Novel        | T141P | nonSynonymous | 15.7 | -        | 201952215 | -           | -            | -           | -           | -           | -                                                                |                                                                             |
| RNPEP    | chr1  | 201983090 | T | G | Novel        | Y142D | nonSynonymous | 31   | -        | 201952218 | -           | -            | -           | -           | -           | -                                                                |                                                                             |
| RNPEP    | chr1  | 201983091 | A | C | Novel        | Y142S | nonSynonymous | 28.8 | -        | 201952219 | -           | -            | -           | -           | -           | -                                                                |                                                                             |
| RNPEP    | chr1  | 201983105 | G | C | Novel        | G147R | nonSynonymous | 31   | -        | 201952233 | -           | -            | -           | -           | -           | -                                                                |                                                                             |
| RNPEP    | chr1  | 201997413 | C | T | rs79980228   | R317C | nonSynonymous | 34   | 0.006233 | 201966541 | 0.005807    | 0.00014984   | 0.063328849 | 0           | 0           | 6.0562E-05 byCluster,byFrequency,by1000G                         |                                                                             |
| RNPEP    | chr1  | 202005604 | G | T | rs190562495  | G614V | nonSynonymous | 29.6 | 0.000127 | 201974732 | 0.0001235   | 0.000179813  | 0           | 0           | 0           | 0 byCluster,byFrequency,by1000G                                  |                                                                             |
| RNPEP    | chr1  | 202001659 | G | C | rs143039696  | A440P | nonSynonymous | 24.1 | 0.000499 | 201970787 | 0.0004777   | 0.000809401  | 9.61538E-05 | 0           | 0           | 0 byCluster,byFrequency,by1000G                                  |                                                                             |
| RNPEP    | chr1  | 202005651 | G | A | rs148685424  | A630T | nonSynonymous | 14.3 | 0.000016 | 201974779 | 0.001408    | 0.0001798022 | 0           | 0           | 0           | 0.002785853 byCluster,byFrequency,by1000G                        |                                                                             |
| RNPEP    | chr1  | 201996189 | G | T | rs74710742   | K260N | nonSynonymous | 20.7 | 0.000008 | 201965317 | 0.011       | 0.015496673  | 0.003843936 | 0           | 0           | 0.00660126 byCluster,byFrequency,by1000G                         |                                                                             |
| RNPEP    | chr1  | 202003320 | C | G | rs146663755  | P504A | nonSynonymous | 22.6 | 0.000799 | 201972448 | 0.0001402   | 4.50E-05     | 0.001155    | 0.00011556  | 0           | 0                                                                | 0 byCluster,byFrequency,by1000G                                             |
| RNPEP    | chr1  | 201989500 | G | A | rs201047350  | G236R | nonSynonymous | 34   | 0.000058 | 201958628 | 0.00005765  | 2.99787E-05  | 0.000384394 | 0.000115554 | 0           | 0                                                                | 0 byCluster,byFrequency                                                     |
| RNPEP    | chr1  | 201983040 | C | T | rs201819747  | S125F | nonSynonymous | 19.3 | 0.000782 | 201952168 | 0.0002353   | 0.002619325  | 0           | 0           | 0           | 0 byCluster,byFrequency                                          |                                                                             |
| RNPEP    | chr1  | 201997416 | T | A | rs374485540  | S318T | nonSynonymous | 24   | 0.000033 | 201966544 | 0.00003295  | 0            | 0.000288295 | 0           | 0           | 0 byCluster,byFrequency                                          |                                                                             |
| RNPEP    | chr1  | 202004437 | G | A | rs3820439    | V579I | nonSynonymous | 13.9 | 0.000008 | 201973565 | 0.325       | 0.279537132  | 0.252552495 | 0.377842227 | 0           | 0.496183669 byCluster,byFrequency,by2Hit2Allele,byHapMap,by1000G |                                                                             |
| RNPEP    | chr1  | 201982956 | G | T | rs549263851  | R97L  | nonSynonymous | 12.9 | 0.000669 | 201952084 | 0.000293    | 0.000996016  | 0           | 0           | 0           | 0.000841184 byFrequency,by1000G                                  |                                                                             |
| RNPEP    | chr1  | 201983054 | T | G | rs557054580  | C130G | nonSynonymous | 14.1 | 0.001254 | 201952182 | 0.0002764   | 0            | 0.0215311   | 0           | 0           | 0 byCluster,byFrequency,by1000G                                  |                                                                             |
| RNPEP    | chr1  | 201996214 | G | C | rs575051595  | E269* | stopGain      | 41   | 0.000099 | 201965342 | 0.00009884  | 7.49356E-05  | 0           | 0.000808875 | 0           | 0                                                                | 0 byCluster,byFrequency                                                     |
| RNPEP    | chr1  | 202003375 | T | C | rs749095534  | I522T | nonSynonymous | 20.3 | 0.000149 | 201972503 | 0.0001483   | 0.000271035  | 0           | 0           | 0           | 0 byFrequency                                                    |                                                                             |
| RNPEP    | chr1  | 201999913 | G | T | rs750504839  | T368S | nonSynonymous | 12.4 | 0.000017 | 201969041 | 0.00001647  | 0            | 0.000200441 | 0           | 0           | 0 byFrequency                                                    |                                                                             |
| RNPEP    | chr1  | 201983096 | G | C | rs758926508  | V144L | nonSynonymous | 25.3 | 0.000009 | 201952224 | 0.000008978 | 0            | 0           | 0           | 0           | 0 unknown                                                        |                                                                             |
| RNPEP    | chr1  | 202003449 | C | T | rs760016335  | P547S | nonSynonymous | 25.6 | 0.000009 | 201972577 | 0.000008237 | 1.69848E-05  | 0           | 0           | 0           | 0 unknown                                                        |                                                                             |
| S100Z    | chr5  | 76875477  | C | T | rs148288662  | R40*  | stopGain      | 37   | 0.000648 | 76171302  | 0.0008686   | 0.001415876  | 0           | 0           | 0           | 0 byCluster,byFrequency,by1000G                                  |                                                                             |
| S100Z    | chr5  | 76875427  | A | C | rs1320308    | E23A  | nonSynonymous | 23.1 | 0.385973 | 76171252  | 0.616       | 0.678840215  | 0.57377551  | 0.568688982 | 0.352296135 | 0                                                                | 0.352296135 byCluster,byFrequency,byOtherPop,by2Hit2Allele,byHapMap,by1000G |
| SCLY     | chr2  | 238083338 | C | T | rs143511249  | R298W | nonSynonymous | 22.3 | 0.000066 | 238991979 | 0.00006589  | 5.99502E-05  | 9.61723E-05 | 0           | 0           | 0.000121153 byCluster,byFrequency                                |                                                                             |
| SCLY     | chr2  | 238082165 | G | A | rs145727476  | V253M | nonSynonymous | 33   | 0.000052 | 238990806 | 0.00004942  | 7.9159E-05   | 0.000100402 | 0           | 0           | 0 byCluster,byFrequency                                          |                                                                             |
| SCLY     | chr2  | 238098333 | C | T | rs148012854  | A447V | nonSynonymous | 19.3 | 0.000061 | 239006974 | 0.00048     | 0.000784071  | 0.000519076 | 0.000271813 | 0.000294291 | 0                                                                | 0.000294291 byCluster,byFrequency                                           |
| SCLY     | chr2  | 238081747 | G | A | rs3210400    | A183T | nonSynonymous | 14.3 | 0.353028 | 238990388 | 0.357       | 0.432888422  | 0.082564398 | 0.211667826 | 0.22497877  | 0                                                                | 0.22497877 byCluster,byFrequency,byHapMap,by1000G                           |
| SLC46A2  | chr9  | 112886572 | C | T | rs1446666415 | V420M | nonSynonymous | 28.2 | 0.000124 | 115648852 | 0.0001235   | 1.4984E-05   | 0.001153181 | 0           | 0           | 6.0562E-05 byCluster,byFrequency                                 |                                                                             |
| SLC46A2  | chr9  | 112889585 | G | A | rs16917454   | A366V | nonSynonymous | 23.2 | 0.001687 | 115651865 | 0.001499    | 3.01468E-05  | 0.016082435 | 0           | 0           | 0.000127828 byCluster,byFrequency,byHapMap,by1000G               |                                                                             |
| SLC46A2  | chr9  | 112890656 | C | T | rs145291738  | R9Q   | nonSynonymous | 14.2 | 0.00086  | 115652936 | 0.0008087   | 9.63639E-05  | 0.009214032 | 0           | 0           | 0 byCluster,byFrequency,by1000G                                  |                                                                             |
| SLC46A2  | chr9  | 112879815 | C | T | rs74339125   | V459M | nonSynonymous | 25.1 | 0.003584 | 115642095 | 0.00369     | 0.00594917   | 0.000960984 | 0           | 0           | 0.000423985 byCluster,byFrequency,by1000G                        |                                                                             |
| SLC46A2  | chr9  | 112889913 | C | T | rs112054166  | D257N | nonSynonymous | 22.7 | 0.006124 | 115652193 | 0.006293    | 0.00978717   | 0.001249279 | 0.000115554 | 0           | 0                                                                | 0.00121124 byCluster,byFrequency,by1000G                                    |
| SLC46A2  | chr9  | 112889792 | A | G | rs756996058  | V297A | nonSynonymous | 17.4 | 0.000016 | 115652072 | 0.00001647  | 1.49885E-05  | 0           | 0           | 0           | 0 byFrequency                                                    |                                                                             |
| SLC46A2  | chr9  | 112890051 | A | C | rs757764932  | C111G | nonSynonymous | 23.7 | 0.000025 | 115652331 | 0.00002471  | 4.56649E-05  | 0           | 0           | 0           | 0 byFrequency                                                    |                                                                             |
| SNX17    | chr2  | 27374354  | A | C | -            | K178Q | nonSynonymous | 23.9 | -        | 27597221  | -           | -            | -           | -           | -           | -                                                                |                                                                             |
| SNX17    | chr2  | 27374721  | C | T | rs142888525  | M215T | nonSynonymous | 23   | 0.000099 | 27597588  | 0.00009884  | 0.00014988   | 0.000192197 | 0           | 0           | 0 byCluster,byFrequency                                          |                                                                             |
| SNX17    | chr2  | 27374730  | G | A | rs145463878  | R218Q | nonSynonymous | 23.5 | 0.00015  | 27597597  | 0.0001483   | 0.000239808  | 0           | 0           | 0           | 0 byCluster,byFrequency,by1000G                                  |                                                                             |
| SNX17    | chr2  | 27373276  | G | A | rs78946094   | E96K  | nonSynonymous | 24.1 | 0.003254 | 27596143  | 0.003311    | 0.005533063  | 0.000770713 | 0           | 0           | 0.000181818 byCluster,byFrequency,by1000G                        |                                                                             |
| SNX17    | chr2  | 27371275  | A | C | rs147740391  | N24H  | nonSynonymous | 26.6 | 0.005152 | 27594142  | 0.005271    | 0.00784503   | 0.001066098 | 0.000115929 | 0           | 0                                                                | 0.000484731 byCluster,byFrequency,by1000G                                   |
| SNX17    | chr2  | 27375882  | C | T | rs377585045  | R339W | nonSynonymous | 26.3 | 0.000088 | 27598749  | 0.00014     | 0            | 0.001057896 | 0.00023116  | 0           | 0                                                                | 0.000121403 byCluster,byFrequency                                           |
| SNX17    | chr2  | 27376335  | G | A | rs747235132  | G402D | nonSynonymous | 23   | 0.000008 | 27599202  | 0.000008236 | 1.50693E-05  | 0           | 0           | 0           | 0 unknown                                                        |                                                                             |
| SNX17    | chr2  | 27376320  | G | A | rs751199615  | R397H | nonSynonymous | 24.7 | 0.000017 | 27599187  | 0.00001647  | 0            | 0           | 0           | 0.00012444  | 0                                                                | 0.00012444 byCluster,byFrequency                                            |
| SNX17    | chr2  | 27375112  | C | T | rs770828684  | R245W | nonSynonymous | 27.2 | 0.000082 | 27597979  | 0.00008236  | 4.49775E-05  | 0           | 0           | 0           | 6.05767E-05 byFrequency                                          |                                                                             |
| SPECC1L  | chr22 | 24347122  | C | T | rs148229290  | P897S | nonSynonymous | 22.7 | 0.001495 | 24743090  | 0.001359    | 1.49858E-05  | 0.000480492 | 0.017679686 | 0.000181686 | 0                                                                | 0.000181686 byCluster,byFrequency,by1000G                                   |
| SPECC1L  | chr22 | 24365533  | C | T | rs190313411  | S962L | nonSynonymous | 25.4 | 0.000047 | 24761501  | 0.00004118  | 2.99742E-05  | 0.000231107 | 0           | 0           | 6.0562E-05 byCluster,byFrequency,by1000G                         |                                                                             |
| SPECC1L  | chr22 | 24328848  | A | G | rs6004132    | T717A | nonSynonymous | 14.8 | 0.000512 | 24724816  | 0.0004859   | 3.15696E-05  | 0.004540967 | 0           | 0           | 0 byCluster,byFrequency,byHapMap,by1000G                         |                                                                             |
| SPECC1L  | chr22 | 24334453  | G | A | rs139167350  | V814I | nonSynonymous | 25.9 | 0.000247 | 24730421  | 0.0002471   | 0.000419551  | 0           | 0           | 0           | 0 byCluster,byFrequency                                          |                                                                             |
| SPECC1L  | chr22 | 24365530  | C | T | rs5996694    | A961V | nonSynonymous | 22.8 | 0.002073 | 24761498  | 0.00215     | 0.001633546  | 0           | 0.000231107 | 0           | 6.0562E-05 byCluster,byFrequency,by1000G                         |                                                                             |
| SPECC1L  | chr22 | 24313452  | C | T | rs35783914   | S98F  | nonSynonymous | 24.7 | 0.003657 | 24709420  | 0.003772    | 0.0058531405 | 0.001057489 | 0           | 0           | 0.000970403 byCluster,byFrequency,by1000G                        |                                                                             |
| SPECC1L  | chr22 | 24322440  | G | A | rs55723436   | R487H | nonSynonymous | 32   | 0.005641 | 24718408  | 0.005716    | 0.00873763   | 0.002527216 | 0           | 0           | 0.002483343 byCluster,byFrequency,by1000G                        |                                                                             |
| SPECC1L  | chr22 | 24321542  | C | T | rs6168869    | L188F | nonSynonymous | 25.6 | 0.007082 | 24717510  | 0.007232    | 0.009060984  | 0.000673465 | 0           | 0           | 0.001514417 byCluster,byFrequency,by1000G                        |                                                                             |
| SPECC1L  | chr22 | 24321580  | A | T | rs56112030   | L200F | nonSynonymous | 17.4 | 0.000008 | 24717548  | 0.012       | 0.011450496  | 0.00163966  | 0.002543353 | 0           | 0                                                                | 0.025681405 byCluster,byFrequency,by1000G                                   |

|         |       |           |   |   |             |       |               |      |          |           |             |             |             |             |             |                                        |                               |                               |
|---------|-------|-----------|---|---|-------------|-------|---------------|------|----------|-----------|-------------|-------------|-------------|-------------|-------------|----------------------------------------|-------------------------------|-------------------------------|
| SPECC1L | chr22 | 24365499  | G | A | rs204718    | V951M | nonSynonymous | 17.8 | 0.000071 | 24761467  | 1           | 1           | 1           | 0.999075358 | 1           | byCluster,byFrequency,byHapMap,by1000G |                               |                               |
| SPECC1L | chr22 | 24321476  | A | G | rs199673620 | M166V | nonSynonymous | 20.9 | 0.000617 | 24717444  | 0.000626    | 0.00107891  | 0.000288406 | 0           | 0           | byCluster,byFrequency,by1000G          |                               |                               |
| SPECC1L | chr22 | 24313419  | C | T | rs199815517 | S87F  | nonSynonymous | 24.1 | 0.000008 | 24709387  | 0.00008236  | 1.49858E-05 | 0           | 0           | 0           | byCluster                              |                               |                               |
| SPECC1L | chr22 | 24321450  | G | A | rs201337978 | R157Q | nonSynonymous | 17.8 | 0.000362 | 24717418  | 0.0003624   | 0.000449559 | 0           | 0           | 0.000848074 | byCluster,byFrequency                  |                               |                               |
| TBC1D17 | chr19 | 49884676  | G | T | -           | E454D | nonSynonymous | 31   | -        | 50387933  | -           | -           | -           | -           | -           | -                                      |                               |                               |
| TBC1D17 | chr19 | 49888574  | A | G | Novel       | S633G | nonSynonymous | 27.3 | -        | 50391831  | -           | -           | -           | -           | -           | -                                      |                               |                               |
| TBC1D17 | chr19 | 49884690  | T | C | rs142816596 | M459T | nonSynonymous | 26.1 | 0.000318 | 50387947  | 0.0002883   | 0           | 0           | 0.003816794 | 6.05767E-05 | byCluster,byFrequency,by1000G          |                               |                               |
| TBC1D17 | chr19 | 49882111  | C | T | rs151237175 | H200Y | nonSynonymous | 21.5 | 0.000198 | 50385368  | 0.0001977   | 0.000299724 | 0           | 0           | 6.0562E-05  | byCluster,byFrequency,by1000G          |                               |                               |
| TBC1D17 | chr19 | 49882046  | C | T | rs146631204 | P178L | nonSynonymous | 34   | 0.000008 | 50385303  | 0.001038    | 0.001590636 | 9.61908E-05 | 0           | 0.00096911  | byCluster,byFrequency                  |                               |                               |
| TBC1D17 | chr19 | 49887746  | A | G | rs149454222 | N524S | nonSynonymous | 23.3 | 0.001283 | 50391003  | 0.001244    | 0.002235279 | 0.000106406 | 0           | 0.000128551 | byCluster,byFrequency,by1000G          |                               |                               |
| TBC1D17 | chr19 | 49882878  | C | T | rs144381223 | R305W | nonSynonymous | 27.6 | 0.00134  | 50386135  | 0.001351    | 0.002268002 | 0.000103263 | 0           | 0.000521921 | byCluster,byFrequency,by1000G          |                               |                               |
| TBC1D17 | chr19 | 49882362  | G | C | rs200460228 | D254H | nonSynonymous | 23.9 | 0.00004  | 50385619  | 0.00004118  | 0           | 0.000292227 | 0           | 0           | 0                                      | byCluster,byFrequency,by1000G |                               |
| TBC1D17 | chr19 | 49887766  | T | G | rs371659502 | C531G | nonSynonymous | 27   | 0.000046 | 50391023  | 0.00004119  | 8.33806E-05 | 0           | 0           | 0           | 0                                      | byCluster,byFrequency         |                               |
| TBC1D17 | chr19 | 49880388  | C | T | rs371768869 | S102L | nonSynonymous | 12.6 | 0.000116 | 50383645  | 0.0001153   | 0.00021234  | 0           | 0           | 0           | 0                                      | byCluster,byFrequency         |                               |
| TBC1D17 | chr19 | 49888509  | C | T | rs376165198 | P611L | nonSynonymous | 23.7 | 0.000294 | 50391766  | 0.0001477   | 0           | 0.003117693 | 0           | 0           | 0                                      | byCluster,byFrequency,by1000G |                               |
| TBC1D17 | chr19 | 49887728  | C | T | rs763562597 | T518I | nonSynonymous | 32   | 0.000009 | 50390985  | 0.000008239 | 1.56769E-05 | 0           | 0           | 0           | 0                                      | unknown                       |                               |
| TIMM8B  | chr11 | 112086719 | G | A | rs368516346 | A17V  | nonSynonymous | 22.9 | 0.00008  | 111957443 | 0.00005768  | 0.000121755 | 0           | 0           | 0           | 0                                      | 0                             | byCluster,byFrequency         |
| UBL4A   | chrX  | 154485830 | C | A | rs781866836 | V102F | nonSynonymous | 26.8 | 0.000012 | 153714169 | 0.00000826  | 0           | 0           | 0           | 0.000161734 | unknown                                |                               |                               |
| ZNF629  | chr16 | 30784410  | C | A | Novel       | G25C  | nonSynonymous | 30   | -        | 30795731  | -           | -           | -           | -           | -           | -                                      |                               |                               |
| ZNF629  | chr16 | 30781848  | T | A | rs61741652  | H827L | nonSynonymous | 11.1 | 0.004595 | 30793169  | 0.003923    | 0.000184695 | 0.044731405 | 0           | 0           | 0                                      | 0                             | byCluster,byFrequency,by1000G |
| ZNF629  | chr16 | 30784160  | C | G | rs199766404 | K56N  | nonSynonymous | 25.6 | 0.000713 | 30795481  | 0.000597    | 0.001159299 | 0           | 0           | 0           | 0                                      | 0                             | byCluster,byFrequency         |
| ZNF629  | chr16 | 30784473  | C | T | rs374972176 | E4K   | nonSynonymous | 23.7 | 0.000091 | 30795794  | 0.00003468  | 0.000205508 | 0           | 0           | 0           | 0                                      | 0                             | byCluster,byFrequency         |
| ZNF629  | chr16 | 30784224  | G | T | rs748667104 | P35H  | nonSynonymous | 22.6 | 0.000012 | 30795545  | 0.00002484  | 4.35161E-05 | 0           | 0           | 0.000166058 | 0                                      | 0                             | byFrequency                   |
| ZNF629  | chr16 | 30782776  | C | T | rs766764636 | D518N | nonSynonymous | 26.8 | 0.000008 | 30794097  | 0.000008239 | 0           | 0           | 0           | 0           | 6.05767E-05                            | unknown                       |                               |
